# Supplementary material for: High Levels of Frataxin Overexpression Lead to Mitochondrial and Cardiac Toxicity in Mouse Models
Source: PubMed Central journal article supplement — Mol Ther Methods Clin Dev. 2020 Sep 1;19:120–38. doi: 10.1016/j.omtm.2020.08.018 (PMC7648087; doi:10.1016/j.omtm.2020.08.018), 2020-09-01
Supplement: mmc1.pdf [file mmc1.pdf]

**OMTM, Volume 19**

## **Supplemental Information**

**High Levels of Frataxin Overexpression**

**Lead to Mitochondrial and Cardiac**

**Toxicity in Mouse Models**

**Brahim Belbellaa, Laurence Reutenauer, Nadia Messaddeq, Laurent Monassier, and H el ene Puccio**

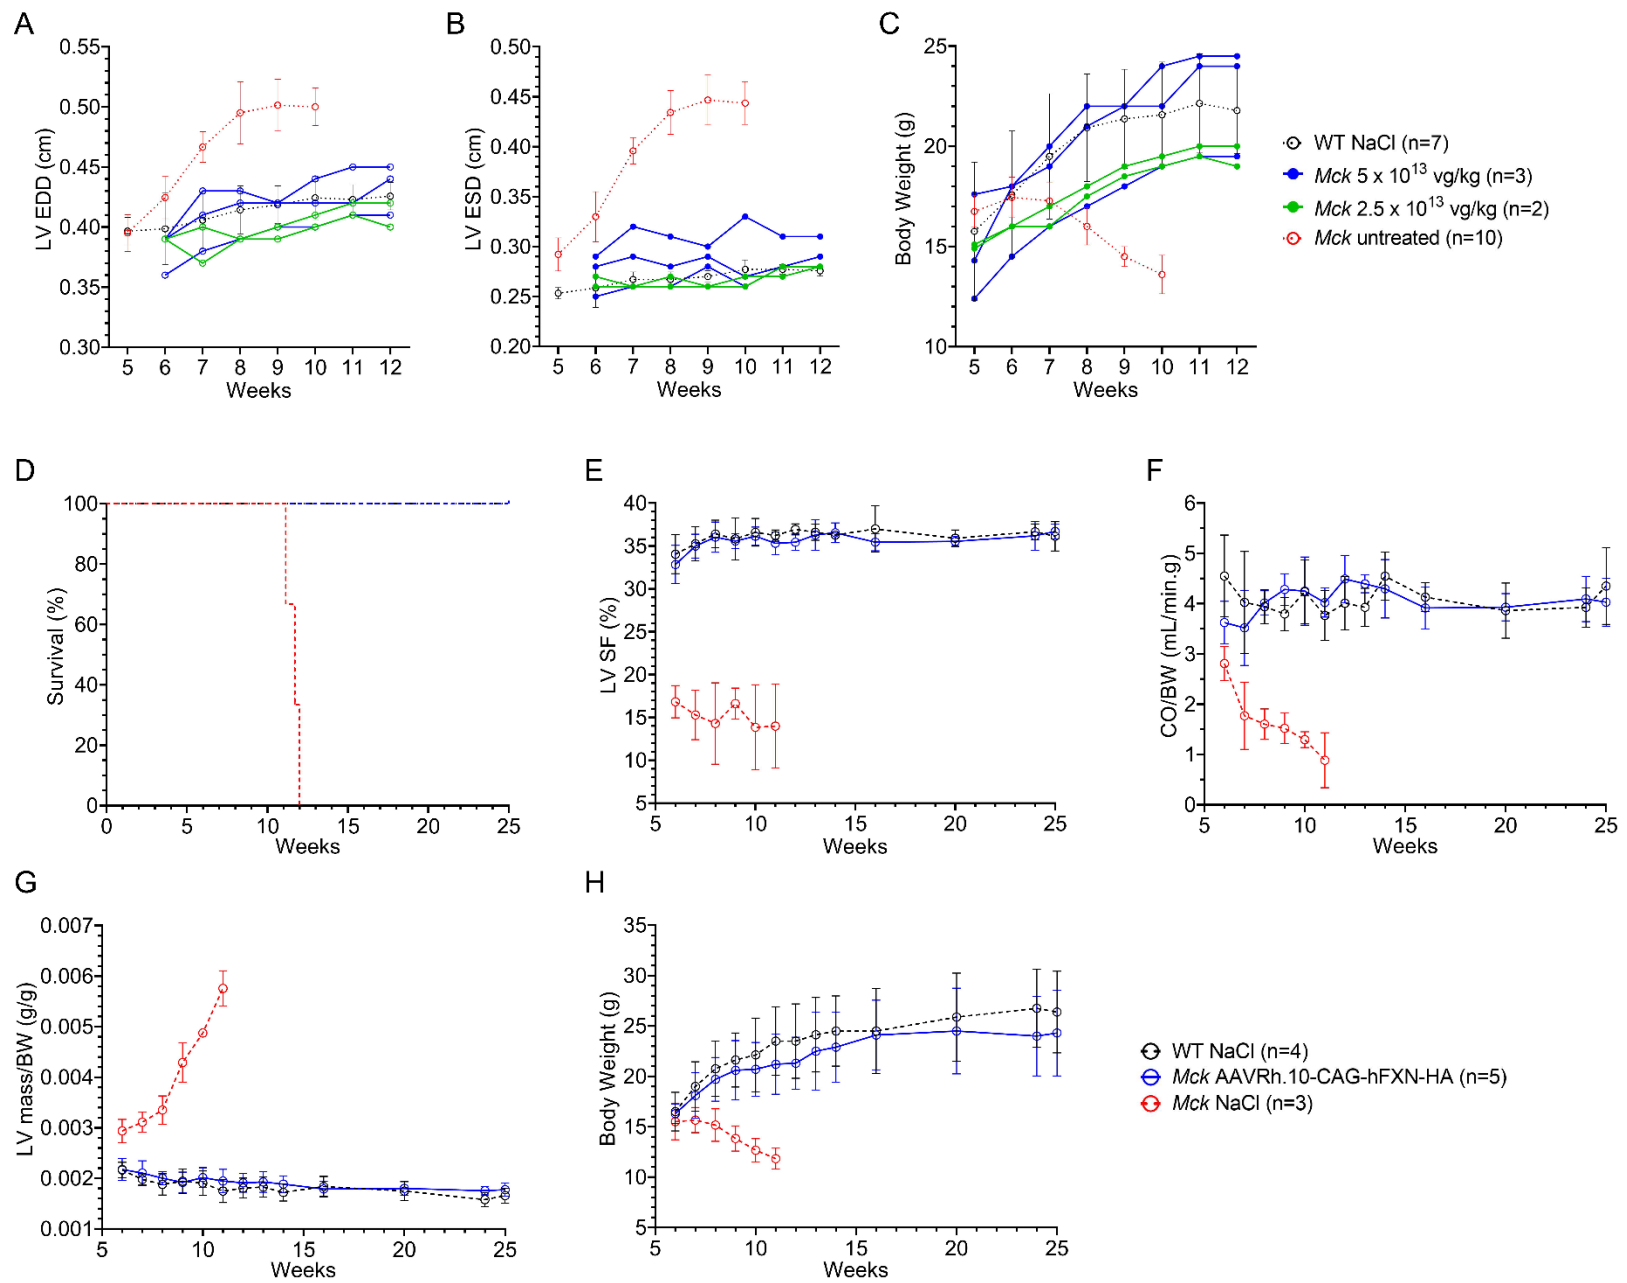

**Figure S1. Extended longitudinal echocardiography evaluation of *Mck* mice treated at 5 weeks of age with AAVRh.10-CAG-hFXN-HA vector, up to 25 weeks of age.** See also figure 1. **(A-C)** WT mice treated with NaCl (n=7) and *Mck* mice treated at  $5 \times 10^{13}$  (n=3) or  $2.5 \times 10^{13}$  (n=2) vg/kg and sacrificed at 12 weeks of age for histological and molecular analysis. Data are represented as individual kinetics for treated *Mck* mice. Control WT mice and untreated *Mck* mice are reported as mean  $\pm$  SD. For untreated *Mck* mice, historical data were plotted. Statistical analyses are reported in Table S2. Figure adapted from Belbellaa et al 2019 Human Molecular Genetics. **(A)** Left ventricle (LV) end-diastole diameter (LV EDD). **(B)** LV end-systole diameter (LV ESD). **(C)** Body weight. **(D-G)** Cohort of mice treated similarly and followed-up until 25 weeks of age. *Mck* mice treated at  $5 \times 10^{13}$  vg/kg (n=5), WT (n=4) and *Mck* (n=3) mice treated with NaCl. Data are reported as mean  $\pm$  SD and statistical analyses are reported in Table S3. **(D)** Survival analysis. Log-rank Mantel-Cox statistical test: WT vs *Mck* AAV,  $p > 0.999$ ; WT vs *Mck* NaCl,  $p = 0.0101$ ; *Mck* AAV vs *Mck* NaCl,  $p = 0.0042$ . **(E)** LV shortening fraction. **(F)** Cardiac blood output measured at the aorta (CO) and normalized to body weight (BW). **(G)** LV mass normalized to BW. **(H)** Body weight.

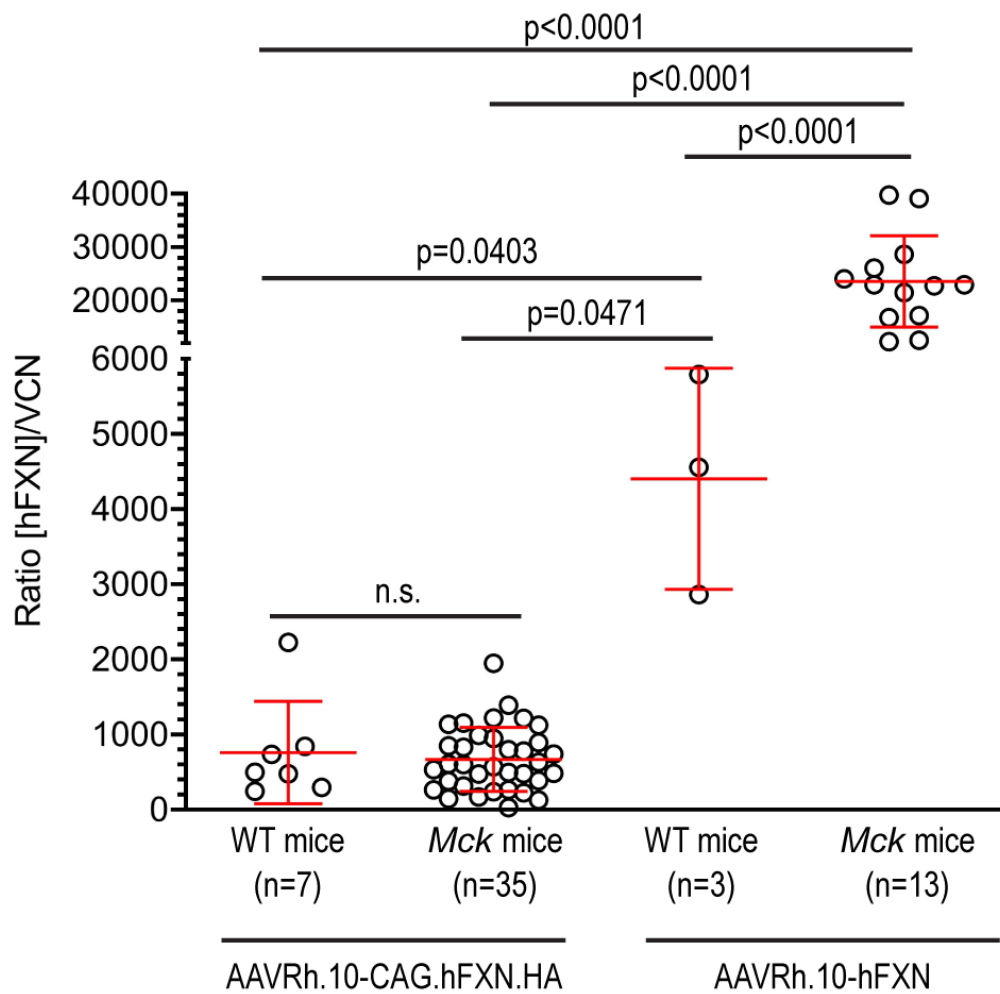

**Figure S2. Comparison of AAVRh.10-CAG-hFXN-HA and AAVRh.10-hFXN vectors expression in the heart of WT and *Mck* mice treated at 7 weeks and sacrificed at 15 weeks.** Vector biodistribution and expression were quantified in each individual mouse heart. The tissue concentration in human FXN protein was measured by ELISA assay (expressed as ng of FXN per mg of total protein) and normalized by the average vector DNA copies per diploid genome. WT mice (n=7) injected with the AAVRh.10-CAG-hFXN-HA vector, as well as WT mice (n=3) and *Mck* mice (n=13) injected with the AAVRh.10-hFXN, correspond to mice injected for the present study, see Table S1. *Mck* mice (n=35) injected with the AAVRh.10-CAG-hFXN-HA vector, correspond to historical data from our previous dose response study, where mice were treated at 5 or 7 weeks of age, with doses ranging from  $5 \times 10^{13}$  down to  $1 \times 10^{12}$  vg/kg, see Belbellaa et al 2019 Human Molecular Genetic. Individual datapoint are reported, with mean and SD. Brown-Forsythe and Welch one-way ANOVA statistical test, p values are reported with n.s.  $p > 0.05$ .

Colocalization analysis - Low magnification

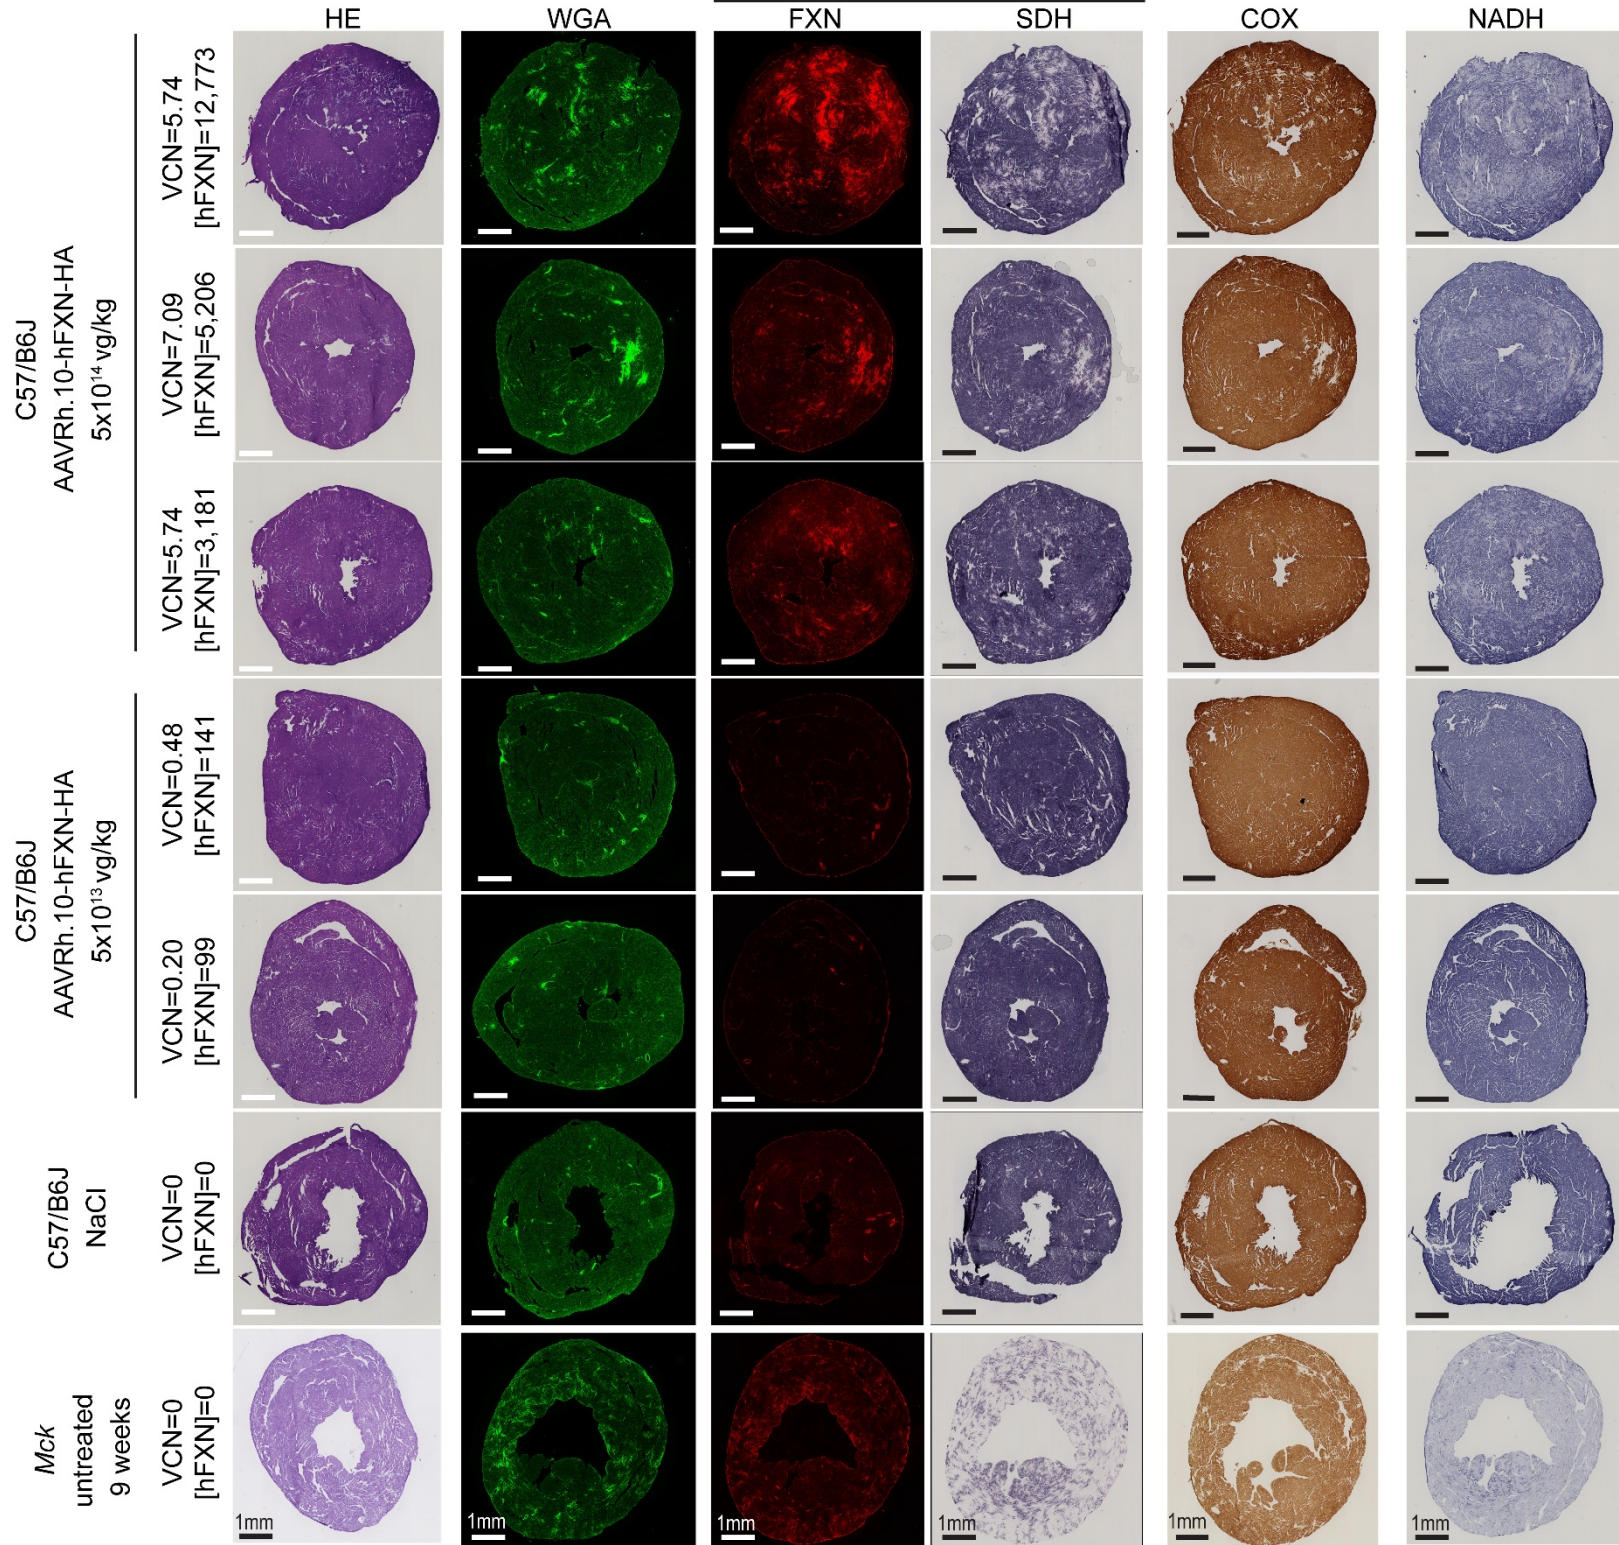

**Figure S3. Extended histological analysis and observation at low-magnification of heart tissue section from wild-type C57/B6J mice treated with AAVRh.10-CAG-FXN-HA vector.** See also figures 2 and 3. Representative images from the histological analysis of adjacent heart tissue section collected from WT C57/B6J mice treated at 7-weeks of age with vehicle (n=1) or AAVRh.10-CAG-hFXN-HA vector at the dose of  $5 \times 10^{14}$  (n=4) or  $5 \times 10^{13}$  (n=3) vg/kg, and then sacrificed at 21 weeks of age. For control, we analyzed heart tissue sections from untreated *Mck* mice collected at 9 weeks of age (Table S1). The two left columns correspond to histological analysis of heart fibrosis following staining with hematoxylin-eosin (HE) or wheat germ agglutinin conjugated to Alexa488nm (WGA). The two middle columns represent single tissue section and microscopy field, after co-staining of FXN-HA by immunofluorescence and succinate dehydrogenase (SDH) activity by *in-situ* histoenzymatic assay, in order to assess the colocalization of FXN overexpression hotspots and the impairment of SDH enzymatic activity. The two-right columns correspond to *in-situ* histoenzymatic activity assay for cytochrome c oxidase (COX) and NADH-ubiquinone oxidoreductase (NADH). The corresponding dose, VCN and [hFXN] are reported next to each image series. Scale bar, 1mm. Same time exposure used for each labelling series.

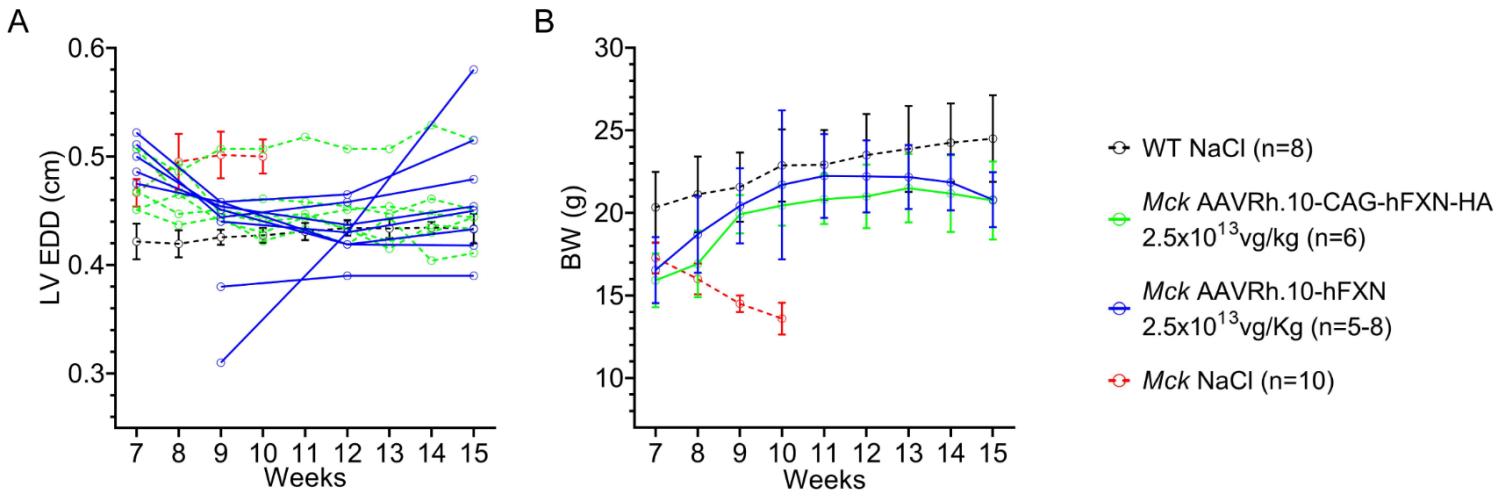

**Figure S4. Supplementary longitudinal echocardiography analysis of *Mck* mice treated at 7 weeks of age with AAVRh.10-CAG-hFXN-HA or AAVRh.10-hFXN vector at  $2.5 \times 10^{13}$  vg/kg.** See also figure 5. **(A)** Left ventricle (LV) end-diastole diameter (LV EDD). Data are represented as individual kinetics for treated *Mck* mice with AAVRh.10-CAG-hFXN-HA (n=6) or with AAVRh.10-hFXN (n=8) vector. Control NaCl-injected WT (n=8) and *Mck* mice (n=10) are reported as mean  $\pm$  SD. Statistical analysis is reported in Table S4. **(B)** Body weight (BW) are reported as mean  $\pm$  SD. For untreated *Mck* mice, historical data were plotted.

A

WT AAVRh.10-hFXN  
VCN=0.08; [hFXN]=355WT NaCl  
VCN=0; [hFXN]=0Untreated *Mck*  
9 weeks of age

Untreated WT spleen

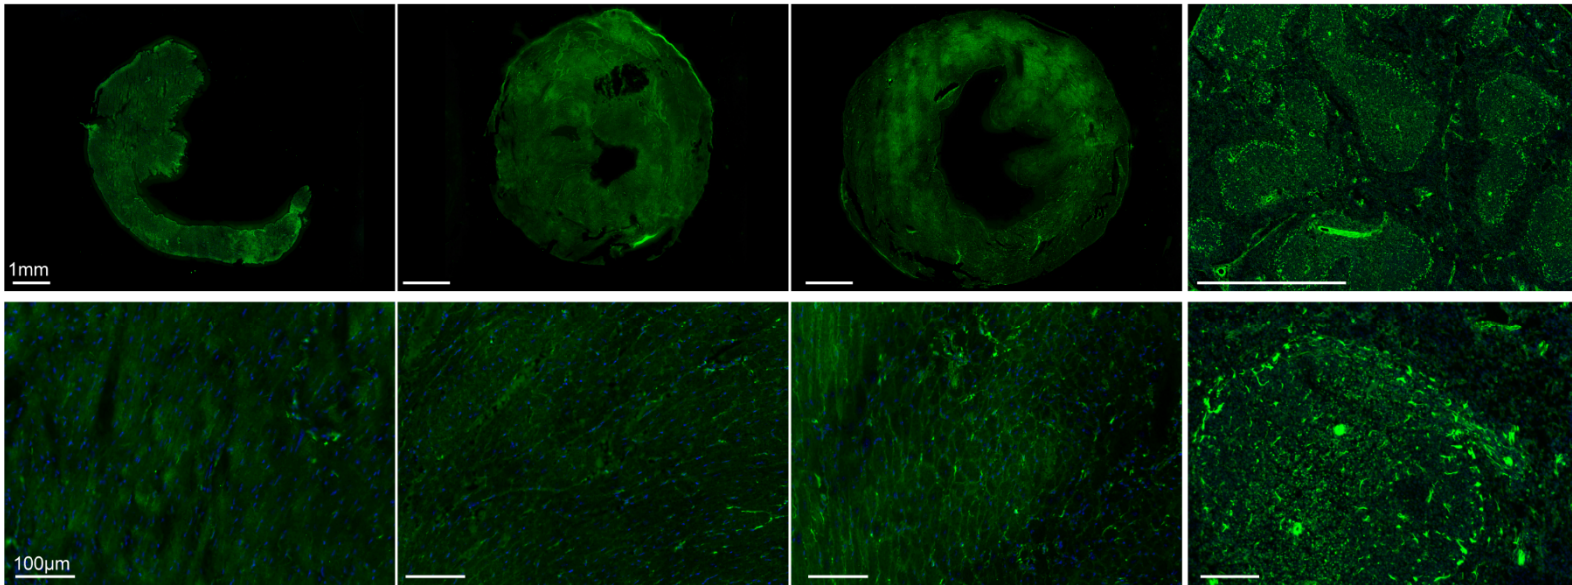

B

*Mck* AAVRh.10-hFXN  $2.5 \times 10^{13}$ vg/kg*Mck* AAVRh.10-hFXN-HA  $2.5 \times 10^{13}$ vg/kg

VCN=0.87; [hFXN]=34,095

VCN=0.96; [hFXN]=37,969

VCN=1.04; [hFXN]=393

VCN=1.25; [hFXN]=924

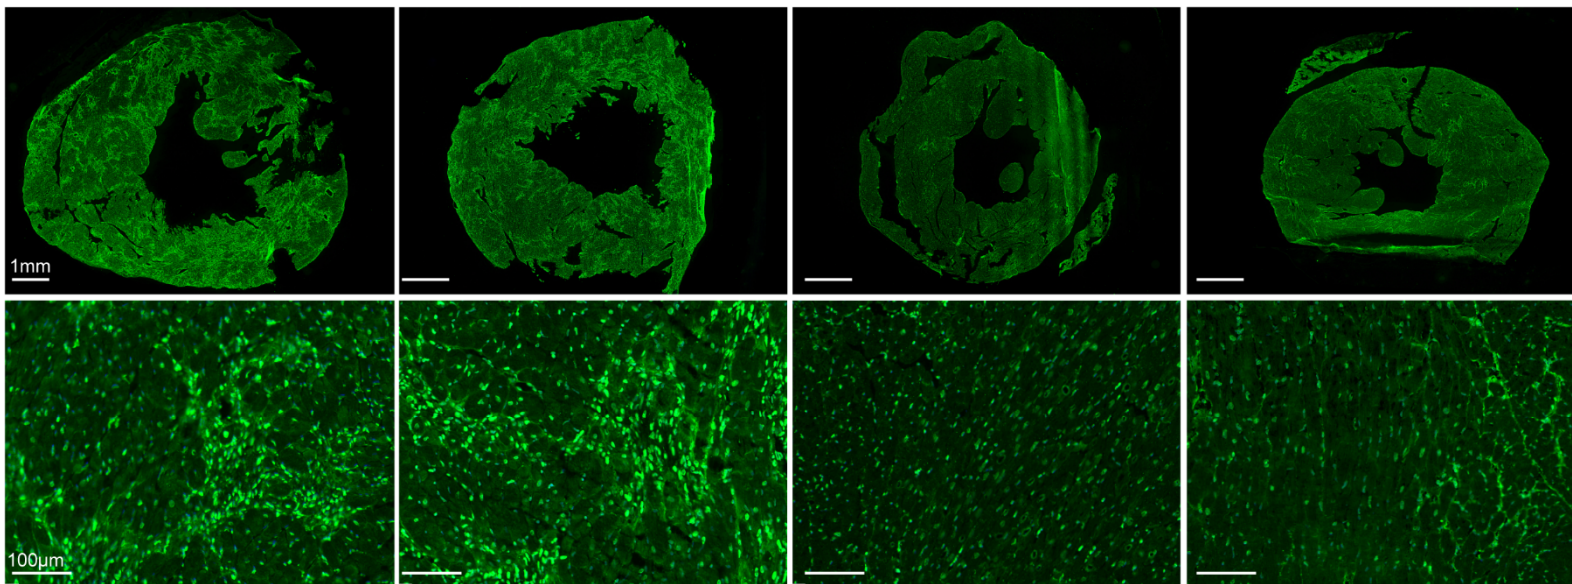WT AAVRh.10-hFXN  
VCN=0.08; [hFXN]=355WT NaCl  
VCN=0; [hFXN]=0Untreated *Mck*  
9 weeks of age

Untreated WT spleen

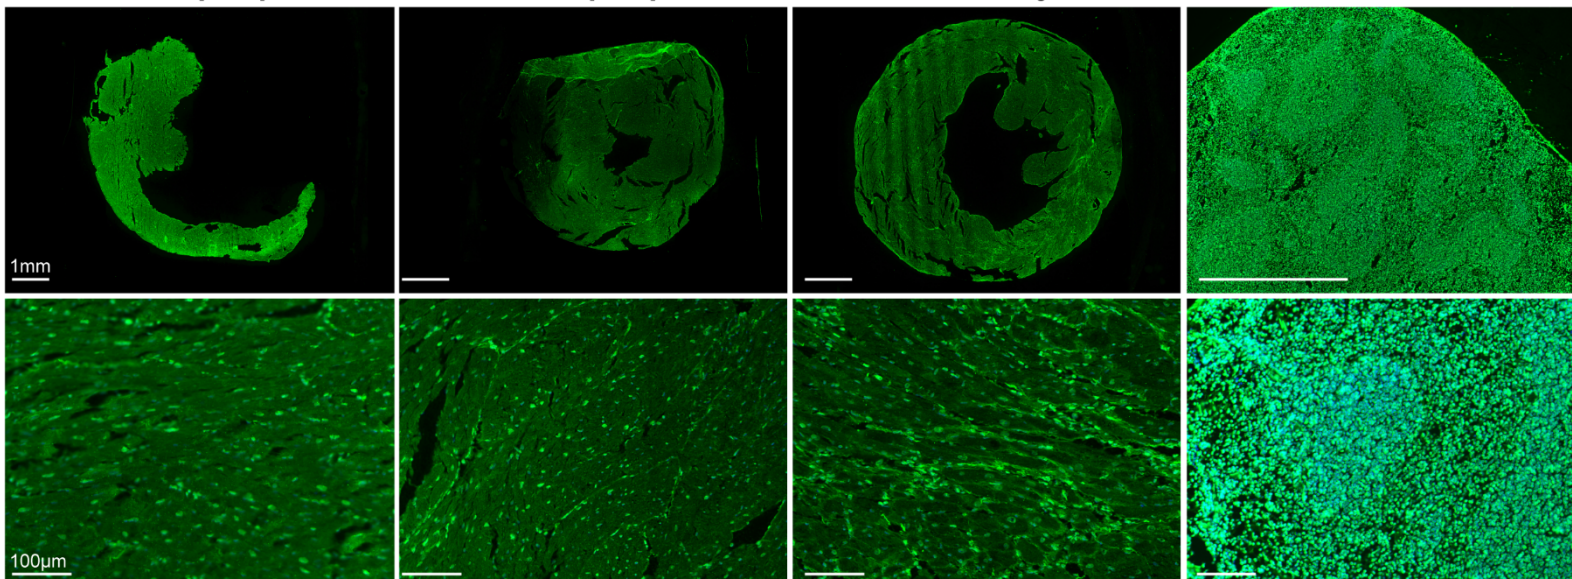



C

*Mck* AAVRh.10-hFXN  $2.5 \times 10^{13}$ vg/kg*Mck* AAVRh.10-hFXN-HA  $2.5 \times 10^{13}$ vg/kg

VCN=0.87; [hFXN]=34,095

VCN=0.96; [hFXN]=37,969

VCN=1.04; [hFXN]=393

VCN=1.25; [hFXN]=924

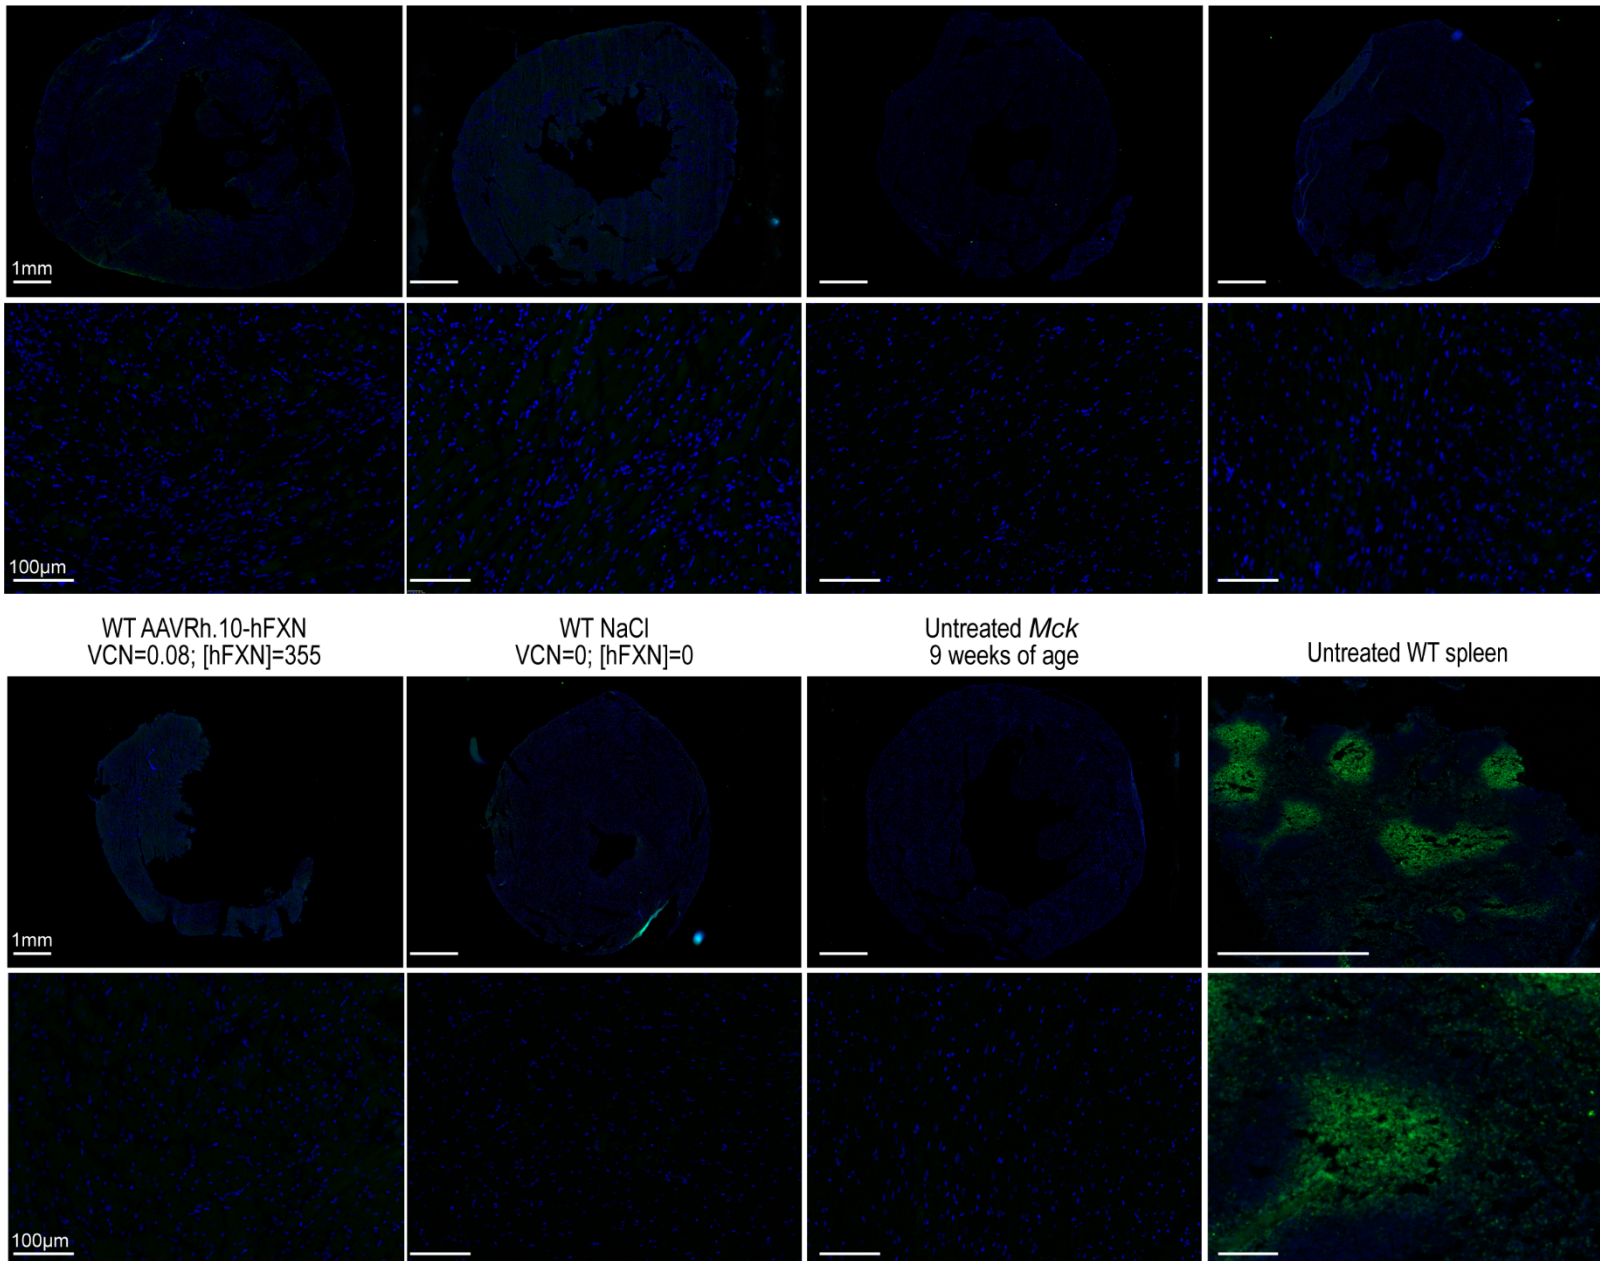

**Figure S5. Extended histological analysis of immune cells infiltration in the heart of *Mck* and wild-type mice treated at 7 weeks with AAVRh.10-hFXN or AAVRh.10-CAG-hFXN-HA vector and sacrificed at 15 weeks.** See also figure 6. Representative histological analysis on adjacent heart tissue sections from *Mck* mice treated with AAVRh.10-hFXN (n=3) or AAVRh.10-CAG-hFXN-HA (n=3) at  $2.5 \times 10^{13}$ vg/kg, WT mouse injected with AAVRh.10-hFXN (n=1) at  $5 \times 10^{12}$ vg/kg, NaCl-injected WT mice (n=3). For control, 9-weeks old untreated *Mck* mice heart and WT mouse spleen (n=1) were also analyzed. **(A)** Immunofluorescence labelling of the monocyte cells marker CD14. **(B)** Immunofluorescence labelling of the leukocyte cells marker CD45. **(C)** Immunofluorescence labelling of the lymphocyte cells marker CD3.

A

## Colocalization analysis - low magnification

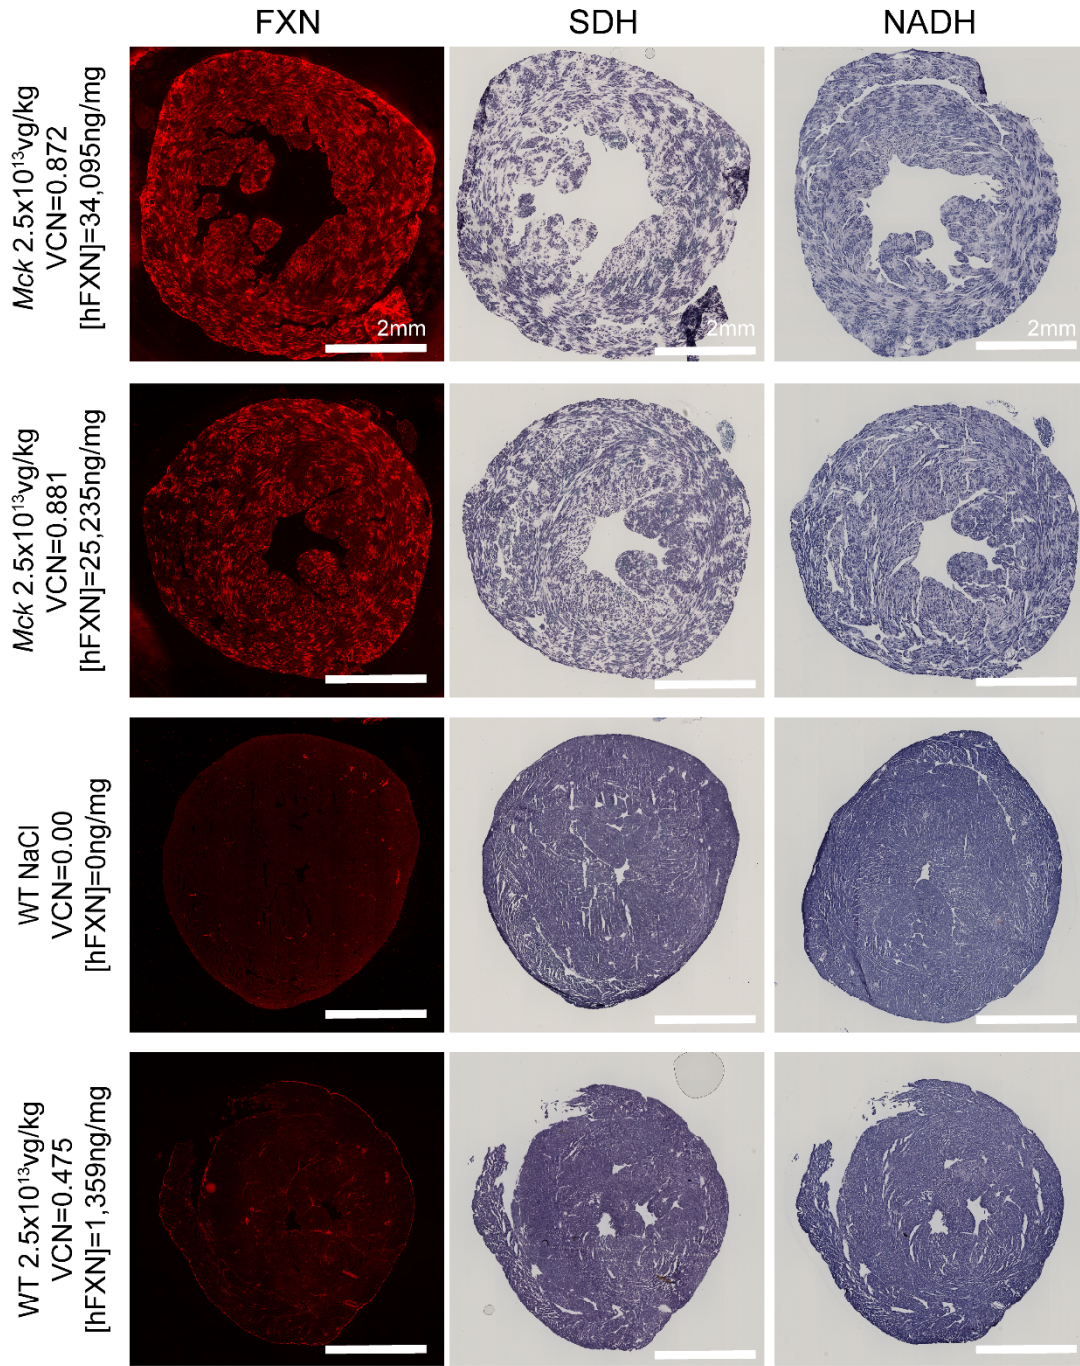

B

## SDH

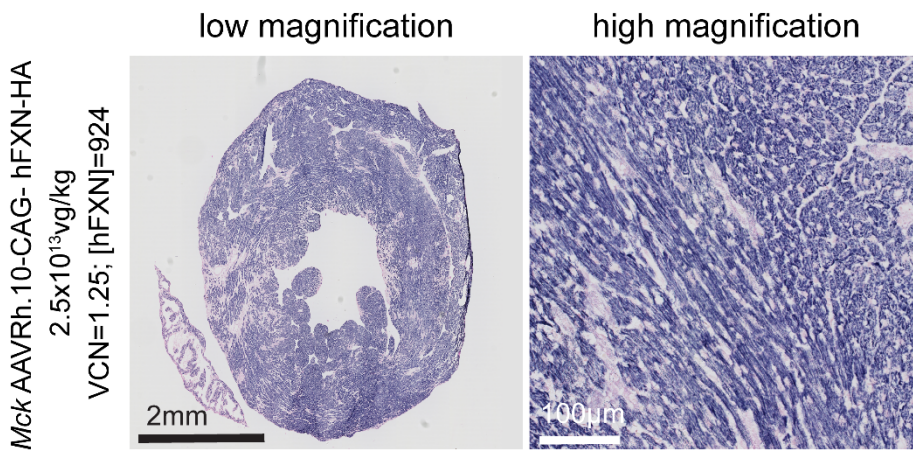

**Figure S6. Extended histological analysis of mitochondrial enzymatic activity and observation at low-magnification of heart tissue sections from wild-type and *Mck* mice treated at 7 weeks with AAVRh.10-hFXN or AAVRh.10-CAG-hFXN-HA vector at  $2.5 \times 10^{13}$  vg/kg and sacrificed at 15 weeks. See also figure 7.**

**(A)** Representative image and histological analysis of adjacent heart tissue sections from *Mck* mice (n=3) and WT mice (n=2) treated with AAVRh.10-hFXN vector and NaCl-injected WT mice (n=2). Left and middle columns represent the single tissue sections and microscopy fields, after co-staining of FXN by immunofluorescence and succinate dehydrogenase (SDH) activity by *in-situ* histoenzymatic assay, in order to assess the colocalization of FXN overexpression hotspots and the impairment of SDH enzymatic activity. Right-column corresponds to *in-situ* histoenzymatic activity assay for NADH-ubiquinone oxidoreductase (NADH). **(B)** *In situ* histoenzymatic assay performed on heart tissue section from a *Mck* mouse treated with AAVRh.10-CAG-hFXN-HA vector and imaged at low and high magnifications. The respective dose, VCN and [hFXN] are reported above each image series. Same time exposure for each labelling series.

**Video S1. Echocardiography parasternal short-axis imaging of the left ventricle performed at 21 weeks of age, in wild-type C57/B6J mice treated with AAVRh.10-CAG-FXN-HA vector at 7 weeks of age.**

**Table S1.** Experimental design: summary of mice age of injection, vector and dose administrated, effective and bioanalytical.

| Age of treatment in weeks | Animal groups | Genotype        | Treatment/vector     | Dose (vg/kg)         | Effective             | Age of sacrifice in weeks | Bioanalytical                                                                                                            |
|---------------------------|---------------|-----------------|----------------------|----------------------|-----------------------|---------------------------|--------------------------------------------------------------------------------------------------------------------------|
| Untreated                 | A             | <i>Mck</i> mice | None                 | N/A                  | 6                     | 9*                        | Histological analysis                                                                                                    |
|                           | B             |                 |                      |                      | 4                     | 8*                        | Electron microscopy                                                                                                      |
|                           | C             |                 |                      |                      | 10 - historical data† | spontaneous death         | Echocardiography<br>Survival                                                                                             |
| 5 weeks of age            | 1             | <i>Mck</i> mice | AAVRh.10-CAG-hFXN-HA | 5x10 <sup>13</sup>   | 3                     | 12§                       | Echocardiography<br>Vector biodistribution/expression<br>Histological analysis                                           |
|                           | 2             |                 |                      | 2.5x10 <sup>13</sup> | 2                     |                           |                                                                                                                          |
|                           | 3             |                 |                      | 5x10 <sup>13</sup>   | 5                     | 25‡                       | Echocardiography                                                                                                         |
|                           | 4             | NaCl            | N/A                  | 3                    |                       |                           |                                                                                                                          |
|                           | 5             | WT mice         | NaCl                 | N/A                  | 7                     |                           |                                                                                                                          |
|                           | 6             |                 |                      | N/A                  | 4                     | 25‡                       | Echocardiography                                                                                                         |
| 7 weeks of age            | 7             | <i>Mck</i> mice | AAVRh.10-CAG-hFXN-HA | 2.5x10 <sup>13</sup> | 6                     | 22¶                       | Echocardiography<br>vector biodistribution/expression<br>Histology analysis<br>Molecular analysis<br>Electron microscopy |
|                           | 8             |                 | AAVRh.10-hFXN        | 2.5x10 <sup>13</sup> | 8                     | 22¶                       |                                                                                                                          |
|                           | 9             | WT mice         | AAVRh.10-CAG-hFXN-HA | 5x10 <sup>14</sup>   | 4                     | 15**                      |                                                                                                                          |
|                           | 10            |                 | AAVRh.10-CAG-hFXN-HA | 5x10 <sup>13</sup>   | 3                     | 15**                      |                                                                                                                          |
|                           | 11            |                 | AAVRh.10-hFXN        | 2.5x10 <sup>13</sup> | 2                     | 15**                      |                                                                                                                          |
|                           | 12            |                 | AAVRh.10-hFXN        | 5x10 <sup>12</sup>   | 1                     | 15**                      |                                                                                                                          |
|                           | 13            |                 | NaCl                 | N/A                  | 11                    | 15** or 22¶               |                                                                                                                          |

Note: *Mck* and WT mice are on 100% C57/B6J genetic background.

Groups A, B and C correspond to untreated *Mck* mice which were used as controls across the different mice studies.

\* untreated *Mck* mice median survival is around 10 weeks of age, so groups A and B were sacrifice at 8 and 9 weeks of age to generate control tissues.

† *Mck* knock-out mice display a very robust and reproducible phenotype as demonstrated previously across several studies, such as Puccio et al 2001 Nature genetics, Seznec et al 2004 Human Molecular Genetics and Perdomini et al 2014 Nature Medicine. To reduce the number of mice used to follow the three-R ethical rules, historical echocardiography *Mck* mice data were used here.

Groups 1, 2 and 5 corresponds to mice originating from our previous dose response study, where mice were treated at 5 or 7 weeks of age, with doses ranging from 5x10<sup>13</sup> down to 1x10<sup>12</sup> vg/kg, see Belbellaa et al 2019 Human Molecular Genetic.

§ Mice sacrificed at 12 weeks of age for histological and molecular analysis. ‡ Mice sacrificed at 25 weeks of age for long term echocardiography follow-up.

\*\* Mice sacrificed at 15 weeks or at 22 weeks of age for histological and molecular analysis.

**Table S2. Statistical analysis of echocardiography measurements presented in Figures 1D-F and S1A-C.**

*Mck* mice treated at 5 weeks of age with AAVRh.10-CAG-hFXN-HA vector at  $5 \times 10^{13}$  or  $2.5 \times 10^{13}$  vg/kg and sacrificed at 12 weeks of age. One-way ANOVA analysis, Mixed-effects model (REML), no assumption of sphericity,  $\alpha = 0.05$ .

| <b>Left ventricle shortening fraction</b>                                                 |                                       |                                       |                  |
|-------------------------------------------------------------------------------------------|---------------------------------------|---------------------------------------|------------------|
| Fixed effect (type III) <0.0001                                                           | F (DFn, DFd) F (1.135, 9.079) = 49.42 | Geisser-Greenhouse's epsilon = 0.3783 |                  |
| Tukey's multiple comparisons test                                                         | Mean Diff.                            | 95.00% CI of diff.                    | Adjusted P Value |
| WT NaCl (n=7) vs. <i>Mck</i> $5 \times 10^{13}$ vg/kg (n=3)                               | 4.250                                 | 1.743 to 6.757                        | <b>0.0044</b>    |
| WT NaCl (n=7) vs. <i>Mck</i> $2.5 \times 10^{13}$ vg/kg (n=2)                             | 1.869                                 | 0.02753 to 3.711                      | <b>0.0471</b>    |
| WT NaCl (n=7) vs. <i>Mck</i> untreated (n=10)                                             | 18.82                                 | 10.45 to 27.19                        | <b>0.0016</b>    |
| <i>Mck</i> $5 \times 10^{13}$ vg/kg (n=3) vs. <i>Mck</i> $2.5 \times 10^{13}$ vg/kg (n=2) | -2.381                                | -4.643 to -0.1192                     | <b>0.0406</b>    |
| <i>Mck</i> $5 \times 10^{13}$ vg/kg (n=3) vs. <i>Mck</i> untreated (n=10)                 | 14.57                                 | 4.878 to 24.26                        | <b>0.0123</b>    |
| <i>Mck</i> $2.5 \times 10^{13}$ vg/kg (n=2) vs. <i>Mck</i> untreated (n=10)               | 16.95                                 | 7.139 to 26.76                        | <b>0.0074</b>    |
| <b>Cardiac output normalized to body weight</b>                                           |                                       |                                       |                  |
| Fixed effect (type III) <0.0001                                                           | F (DFn, DFd) F (1.590, 12.72) = 90.72 | Geisser-Greenhouse's epsilon = 0.5299 |                  |
| Tukey's multiple comparisons test                                                         | Mean Diff.                            | 95.00% CI of diff.                    | Adjusted P Value |
| WT NaCl (n=7) vs. <i>Mck</i> $5 \times 10^{13}$ vg/kg (n=3)                               | 0.09299                               | -0.4230 to 0.6090                     | 0.9207           |
| WT NaCl (n=7) vs. <i>Mck</i> $2.5 \times 10^{13}$ vg/kg (n=2)                             | 0.2953                                | -0.2019 to 0.7926                     | 0.2669           |
| WT NaCl (n=7) vs. <i>Mck</i> untreated (n=10)                                             | 2.727                                 | 1.868 to 3.586                        | <b>0.0003</b>    |
| <i>Mck</i> $5 \times 10^{13}$ vg/kg (n=3) vs. <i>Mck</i> $2.5 \times 10^{13}$ vg/kg (n=2) | 0.2024                                | -0.08695 to 0.4917                    | 0.1728           |
| <i>Mck</i> $5 \times 10^{13}$ vg/kg (n=3) vs. <i>Mck</i> untreated (n=10)                 | 2.634                                 | 1.374 to 3.894                        | <b>0.0036</b>    |
| <i>Mck</i> $2.5 \times 10^{13}$ vg/kg (n=2) vs. <i>Mck</i> untreated (n=10)               | 2.432                                 | 1.454 to 3.410                        | <b>0.0019</b>    |
| <b>Left ventricle mass normalized to body</b>                                             |                                       |                                       |                  |
| Fixed effect (type III) = 0.0014                                                          | F (DFn, DFd) F (1.015, 8.123) = 22.10 | Geisser-Greenhouse's epsilon = 0.3385 |                  |
| Tukey's multiple comparisons test                                                         | Mean Diff.                            | 95.00% CI of diff.                    | Adjusted P Value |
| WT NaCl (n=7) vs. <i>Mck</i> $5 \times 10^{13}$ vg/kg (n=3)                               | 7.256e-005                            | -2.800e-005 to 0.0001731              | 0.1575           |
| WT NaCl (n=7) vs. <i>Mck</i> $2.5 \times 10^{13}$ vg/kg (n=2)                             | 8.208e-005                            | -2.791e-006 to 0.0001670              | 0.0571           |
| WT NaCl (n=7) vs. <i>Mck</i> untreated (n=10)                                             | -0.001551                             | -0.003006 to -9.562e-005              | 0.0395           |
| <i>Mck</i> $5 \times 10^{13}$ vg/kg (n=3) vs. <i>Mck</i> $2.5 \times 10^{13}$ vg/kg (n=2) | 9.524e-006                            | -9.986e-005 to 0.0001189              | 0.9895           |
| <i>Mck</i> $5 \times 10^{13}$ vg/kg (n=3) vs. <i>Mck</i> untreated (n=10)                 | -0.001624                             | -0.002941 to -0.0003064               | <b>0.0249</b>    |
| <i>Mck</i> $2.5 \times 10^{13}$ vg/kg (n=2) vs. <i>Mck</i> untreated (n=10)               | -0.001633                             | -0.003034 to -0.0002318               | <b>0.0302</b>    |
| <b>Left ventricle end diastole diameter</b>                                               |                                       |                                       |                  |
| Fixed effect (type III) = 0.0023                                                          | F (DFn, DFd) F (1.074, 6.086) = 24.40 | Geisser-Greenhouse's epsilon = 0.3580 |                  |
| Tukey's multiple comparisons test                                                         | Mean Diff.                            | 95.00% CI of diff.                    | Adjusted P Value |
| WT NaCl (n=7) vs. <i>Mck</i> $5 \times 10^{13}$ vg/kg (n=3)                               | 0.000                                 | -0.01115 to 0.01115                   | >0.9999          |
| WT NaCl (n=7) vs. <i>Mck</i> $2.5 \times 10^{13}$ vg/kg (n=2)                             | 0.01476                               | 0.005639 to 0.02388                   | <b>0.0056</b>    |
| WT NaCl (n=7) vs. <i>Mck</i> untreated (n=10)                                             | -0.05041                              | -0.09929 to -0.001542                 | <b>0.0446</b>    |
| <i>Mck</i> $5 \times 10^{13}$ vg/kg (n=3) vs. <i>Mck</i> $2.5 \times 10^{13}$ vg/kg (n=2) | 0.01476                               | -0.0006284 to 0.03015                 | 0.0589           |
| <i>Mck</i> $5 \times 10^{13}$ vg/kg (n=3) vs. <i>Mck</i> untreated (n=10)                 | -0.05041                              | -0.09703 to -0.003798                 | <b>0.0387</b>    |
| <i>Mck</i> $2.5 \times 10^{13}$ vg/kg (n=2) vs. <i>Mck</i> untreated (n=10)               | -0.06518                              | -0.1239 to -0.006452                  | <b>0.0355</b>    |
| <b>Left ventricle end systole diameter</b>                                                |                                       |                                       |                  |
| Fixed effect (type III) = 0.0016                                                          | F (DFn, DFd) F (1.010, 5.721) = 31.31 | Geisser-Greenhouse's epsilon = 0.3365 |                  |
| Tukey's multiple comparisons test                                                         | Mean Diff.                            | 95.00% CI of diff.                    | Adjusted P Value |
| WT NaCl (n=7) vs. <i>Mck</i> $5 \times 10^{13}$ vg/kg (n=3)                               | -0.01839                              | -0.02474 to -0.01205                  | <b>0.0002</b>    |
| WT NaCl (n=7) vs. <i>Mck</i> $2.5 \times 10^{13}$ vg/kg (n=2)                             | 0.001131                              | -0.008187 to 0.01045                  | 0.9729           |
| WT NaCl (n=7) vs. <i>Mck</i> untreated (n=10)                                             | -0.1221                               | -0.2032 to -0.04113                   | <b>0.0097</b>    |
| <i>Mck</i> $5 \times 10^{13}$ vg/kg (n=3) vs. <i>Mck</i> $2.5 \times 10^{13}$ vg/kg (n=2) | 0.01952                               | 0.008714 to 0.03033                   | <b>0.0032</b>    |
| <i>Mck</i> $5 \times 10^{13}$ vg/kg (n=3) vs. <i>Mck</i> untreated (n=10)                 | -0.1037                               | -0.1842 to -0.02330                   | <b>0.0213</b>    |

**Table S3. Statistical analysis of echocardiography measurements presented in Figure S1D-H.**

*Mck* mice treated at 5 weeks of age with AAVRh.10-CAG-hFXN-HA vector at  $5 \times 10^{13}$ vg/kg and sacrificed at 25 weeks of age. One-way ANOVA analysis, Mixed-effects model (REML), no assumption of sphericity,  $\alpha = 0.05$ .

| <b>Left ventricle shortening fraction</b>                               |                                       |                                       |                   |
|-------------------------------------------------------------------------|---------------------------------------|---------------------------------------|-------------------|
| Fixed effect (type III) <b>&lt;0.0001</b>                               | F (1.122, 16.28) = 1093               | Geisser-Greenhouse's epsilon = 0.5612 |                   |
| Tukey's multiple comparisons test                                       | Mean Diff.                            | 95.00% CI of diff.                    | Adjusted P Value  |
| WT NaCl (n=4) vs. <i>Mck</i> AAV $5 \times 10^{13}$ vg/kg (n=5)         | 0.5254                                | 0.06266 to 0.9881                     | <b>0.0263</b>     |
| WT NaCl (n=4) vs. <i>Mck</i> NaCl (n=3)                                 | 21.00                                 | 18.49 to 23.50                        | <b>&lt;0.0001</b> |
| <i>Mck</i> AAV $5 \times 10^{13}$ vg/kg (n=5) vs. <i>Mck</i> NaCl (n=3) | 20.47                                 | 17.76 to 23.18                        | <b>&lt;0.0001</b> |
| <b>Cardiac output normalized to body weight</b>                         |                                       |                                       |                   |
| Fixed effect (type III) <b>&lt;0.0001</b>                               | F (0.9670, 14.02) = 107.1             | Geisser-Greenhouse's epsilon = 0.4835 |                   |
| Tukey's multiple comparisons test                                       | Mean Diff.                            | 95.00% CI of diff.                    | Adjusted P Value  |
| WT NaCl (n=4) vs. <i>Mck</i> AAV $5 \times 10^{13}$ vg/kg (n=5)         | 0.01580                               | -0.2946 to 0.3262                     | 0.9899            |
| WT NaCl (n=4) vs. <i>Mck</i> NaCl (n=3)                                 | 2.435                                 | 1.925 to 2.945                        | <b>&lt;0.0001</b> |
| <i>Mck</i> AAV $5 \times 10^{13}$ vg/kg (n=5) vs. <i>Mck</i> NaCl (n=3) | 2.419                                 | 1.411 to 3.427                        | <b>0.0013</b>     |
| <b>Left ventricle mass normalized to body</b>                           |                                       |                                       |                   |
| Fixed effect (type III) <b>&lt;0.0001</b>                               | F (DFn, DFd) F (1.015, 8.123) = 22.10 | Geisser-Greenhouse's epsilon = 0.3385 |                   |
| Tukey's multiple comparisons test                                       | Mean Diff.                            | 95.00% CI of diff.                    | Adjusted P Value  |
| WT NaCl (n=4) vs. <i>Mck</i> AAV $5 \times 10^{13}$ vg/kg (n=5)         | -9.278e-005                           | -0.0001489 to -3.670e-005             | <b>0.0022</b>     |
| WT NaCl (n=4) vs. <i>Mck</i> NaCl (n=3)                                 | -0.002223                             | -0.003625 to -0.0008206               | <b>0.0083</b>     |
| <i>Mck</i> AAV $5 \times 10^{13}$ vg/kg (n=5) vs. <i>Mck</i> NaCl (n=3) | -0.002130                             | -0.003489 to -0.0007711               | <b>0.0087</b>     |
| <b>Body weight</b>                                                      |                                       |                                       |                   |
| Fixed effect (type III) = <b>0.0003</b>                                 | F (1.024, 8.700) = 33.02              | Geisser-Greenhouse's epsilon = 0.5118 |                   |
| Tukey's multiple comparisons test                                       | Mean Diff.                            | 95.00% CI of diff.                    | Adjusted P Value  |
| WT NaCl (n=4) vs. <i>Mck</i> AAV $5 \times 10^{13}$ vg/kg (n=5)         | 1.456                                 | 0.9015 to 2.010                       | <b>&lt;0.0001</b> |
| WT NaCl (n=4) vs. <i>Mck</i> NaCl (n=3)                                 | 8.899                                 | 3.487 to 14.31                        | <b>0.0071</b>     |
| <i>Mck</i> AAV $5 \times 10^{13}$ vg/kg (n=5) vs. <i>Mck</i> NaCl (n=3) | 7.443                                 | 2.839 to 12.05                        | <b>0.0076</b>     |

**Table S4. Statistical analysis of echocardiography measurements presented in Figures 5I-L and S4A-B.***Mck* mice treated at 7 weeks of age with AAVRh.10-CAG-hFXN-HA vector or AAVRh.10-hFXN vector at  $2.5 \times 10^{13}$ vg/kg.One-way ANOVA analysis, Mixed-effects model (REML), no assumption of sphericity,  $\alpha = 0.05$ .**Table S4. Statistical analysis of echocardiography measurements in *Mck* mice treated at 7 weeks of age with AAVRh.10-CAG-hFXN-HA vector or AAVRh.10-hFXN vector at  $2.5 \times 10^{13}$ vg/kg. One-way ANOVA analysis, Mixed-effects model (REML), no assumption of sphericity,  $\alpha = 0.05$** 

| <b>Left ventricle shortening fraction</b>                                |                                         |                                       |                  |
|--------------------------------------------------------------------------|-----------------------------------------|---------------------------------------|------------------|
| Fixed effect (type III) = <b>0.0112</b>                                  | F (DFn, DFd): F (0.7212, 3.366) = 27.54 | Geisser-Greenhouse's epsilon = 0.2404 |                  |
| Tukey's multiple comparisons test                                        | Mean Diff.                              | 95.00% CI of diff.                    | Adjusted P Value |
| <i>Mck</i> AAVRh.10-hFXN (n=8) vs. <i>Mck</i> AAVRh.10-CAG-hFXN-HA (n=6) | -1.992                                  | -9.261 to 5.278                       | 0.6098           |
| <i>Mck</i> AAVRh.10-hFXN (n=8) vs. <i>Mck</i> untreated (n=10)           | 14.00                                   | -125.7 to 153.7                       | 0.4786           |
| <i>Mck</i> AAVRh.10-hFXN (n=8) vs. WT NaCl (n=8)                         | -9.949                                  | -24.29 to 4.392                       | 0.1251           |
| <i>Mck</i> AAVRh.10-CAG-hFXN-HA (n=6) vs. <i>Mck</i> untreated (n=10)    | 16.00                                   | -4.653 to 36.64                       | 0.0960           |
| <i>Mck</i> AAVRh.10-CAG-hFXN-HA (n=6) vs. WT NaCl (n=8)                  | -7.957                                  | -14.23 to -1.683                      | <b>0.0153</b>    |
| <i>Mck</i> untreated (n=10) vs. WT NaCl (n=8)                            | -23.95                                  | -27.96 to -19.95                      | <b>0.0003</b>    |
| <b>Cardiac output normalized to body weight</b>                          |                                         |                                       |                  |
| Fixed effect (type III) = <b>0.0112</b>                                  | F (DFn, DFd): F (0.7212, 3.366) = 27.54 | Geisser-Greenhouse's epsilon = 0.2404 |                  |
| Tukey's multiple comparisons test                                        | Mean Diff.                              | 95.00% CI of diff.                    | Adjusted P Value |
| <i>Mck</i> AAVRh.10-hFXN (n=8) vs. <i>Mck</i> AAVRh.10-CAG-hFXN-HA (n=6) | -0.4267                                 | -1.736 to 0.8823                      | 0.5016           |
| <i>Mck</i> AAVRh.10-hFXN (n=8) vs. <i>Mck</i> untreated (n=10)           | 2.016                                   | -18.42 to 22.45                       | 0.4847           |
| <i>Mck</i> AAVRh.10-hFXN (n=8) vs. WT NaCl (n=8)                         | -0.6183                                 | -2.992 to 1.756                       | 0.6401           |
| <i>Mck</i> AAVRh.10-CAG-hFXN-HA (n=6) vs. <i>Mck</i> untreated (n=10)    | 2.443                                   | 0.3170 to 4.569                       | <b>0.0344</b>    |
| <i>Mck</i> AAVRh.10-CAG-hFXN-HA (n=6) vs. WT NaCl (n=8)                  | -0.1916                                 | -1.029 to 0.6456                      | 0.8813           |
| <i>Mck</i> untreated (n=10) vs. WT NaCl (n=8)                            | -2.635                                  | -3.164 to -2.105                      | <b>0.0006</b>    |
| <b>Left ventricle mass normalized to body</b>                            |                                         |                                       |                  |
| Fixed effect (type III) = <b>0.0138</b>                                  | F (DFn, DFd): F (0.7034, 3.282) = 24.91 | Geisser-Greenhouse's epsilon = 0.2345 |                  |
| Tukey's multiple comparisons test                                        | Mean Diff.                              | 95.00% CI of diff.                    | Adjusted P Value |
| <i>Mck</i> AAVRh.10-hFXN (n=8) vs. <i>Mck</i> AAVRh.10-CAG-hFXN-HA (n=6) | 0.0009792                               | 4.837e-005 to 0.001910                | <b>0.0437</b>    |
| <i>Mck</i> AAVRh.10-hFXN (n=8) vs. <i>Mck</i> untreated (n=10)           | 0.001687                                | -6.490e-006 to 0.003381               | <b>0.0505</b>    |
| <i>Mck</i> AAVRh.10-hFXN (n=8) vs. WT NaCl (n=8)                         | -0.0004650                              | -0.02119 to 0.02026                   | 0.9513           |
| <i>Mck</i> AAVRh.10-CAG-hFXN-HA (n=6) vs. <i>Mck</i> untreated (n=10)    | 0.0007082                               | 0.0002797 to 0.001137                 | <b>0.0033</b>    |
| <i>Mck</i> AAVRh.10-CAG-hFXN-HA (n=6) vs. WT NaCl (n=8)                  | -0.001444                               | -0.003638 to 0.0007495                | 0.1412           |
| <i>Mck</i> untreated (n=10) vs. WT NaCl (n=8)                            | -0.002152                               | -0.003301 to -0.001004                | <b>0.0087</b>    |
| <b>Left ventricle end diastole diameter</b>                              |                                         |                                       |                  |
| Fixed effect (type III) = <b>0.0132</b>                                  | F (DFn, DFd): F (0.7051, 5.170) = 15.30 | Geisser-Greenhouse's epsilon = 0.2350 |                  |
| Tukey's multiple comparisons test                                        | Mean Diff.                              | 95.00% CI of diff.                    | Adjusted P Value |
| <i>Mck</i> AAVRh.10-hFXN (n=8) vs. <i>Mck</i> AAVRh.10-CAG-hFXN-HA (n=6) | -0.001386                               | -0.05710 to 0.05433                   | 0.9992           |
| <i>Mck</i> AAVRh.10-hFXN (n=8) vs. <i>Mck</i> untreated (n=10)           | -0.03596                                | -0.9011 to 0.8292                     | 0.8200           |
| <i>Mck</i> AAVRh.10-hFXN (n=8) vs. WT NaCl (n=8)                         | 0.02581                                 | -0.05129 to 0.1029                    | 0.4848           |
| <i>Mck</i> AAVRh.10-CAG-hFXN-HA (n=6) vs. <i>Mck</i> untreated (n=10)    | -0.03457                                | -0.09014 to 0.02099                   | 0.1603           |
| <i>Mck</i> AAVRh.10-CAG-hFXN-HA (n=6) vs. WT NaCl (n=8)                  | 0.02720                                 | 0.01198 to 0.04241                    | <b>0.0020</b>    |
| <i>Mck</i> untreated (n=10) vs. WT NaCl (n=8)                            | -0.06177                                | -0.09496 to -0.02858                  | <b>0.0088</b>    |
| <b>Left ventricle end systole diameter</b>                               |                                         |                                       |                  |
| Fixed effect (type III) = <b>0.0132</b>                                  | F (DFn, DFd): F (0.7051, 5.170) = 15.30 | Geisser-Greenhouse's epsilon = 0.2350 |                  |
| Tukey's multiple comparisons test                                        | Mean Diff.                              | 95.00% CI of diff.                    | Adjusted P Value |
| <i>Mck</i> AAVRh.10-hFXN (n=8) vs. <i>Mck</i> AAVRh.10-CAG-hFXN-HA (n=6) | -0.001386                               | -0.05710 to 0.05433                   | 0.9992           |
| <i>Mck</i> AAVRh.10-hFXN (n=8) vs. <i>Mck</i> untreated (n=10)           | -0.03596                                | -0.9011 to 0.8292                     | 0.8200           |
| <i>Mck</i> AAVRh.10-hFXN (n=8) vs. WT NaCl (n=8)                         | 0.02581                                 | -0.05129 to 0.1029                    | 0.4848           |
| <i>Mck</i> AAVRh.10-CAG-hFXN-HA (n=6) vs. <i>Mck</i> untreated (n=10)    | -0.03457                                | -0.09014 to 0.02099                   | 0.1603           |
| <i>Mck</i> AAVRh.10-CAG-hFXN-HA (n=6) vs. WT NaCl (n=8)                  | 0.02720                                 | 0.01198 to 0.04241                    | <b>0.0020</b>    |
| <i>Mck</i> untreated (n=10) vs. WT NaCl (n=8)                            | -0.06177                                | -0.09496 to -0.02858                  | <b>0.0088</b>    |



**Table S5.** Primers sequence.

| <b>Gene</b>    | <b>Forward</b>          | <b>Reverse</b>            |
|----------------|-------------------------|---------------------------|
| <i>18s</i>     | ACCGCAGCTAGGAATAATGGAA  | CCTCCGACTTTCGTTCTTGATT    |
| <i>Hprt</i>    | GTAATGATCAGTCAACGGGGGAC | CCAGCAAGCTTGCAACCTTAACCA  |
| <i>Fxn</i>     | ATGGCGTGCTCACCATTAAG    | GGCCAATGAAGACAAGTCCA      |
| <i>FXN</i>     | AGAGGAAACGCTGGACTCTT    | ACGCTTAGGTCCACTGGATG      |
| <i>Col1a1</i>  | TCACCTACAGCACCCCTTGTG   | GTCCGAATTCTGGTCTGG        |
| <i>Col3a1</i>  | TCAAGGCTGAAGGAAACAGC    | GGGTAGTCTCATTGCCTTGC      |
| <i>Tgf · 1</i> | GGAGAGCCCTGGATACCAAC    | CAACCCAGGTCCTTCCTAAA      |
| <i>Il1b</i>    | AGCTATGGCAACTGTTCTCTGA  | CTGCCACAGCTTCTCCACA       |
| <i>Il6</i>     | GTGACAACCACGGCCTTC      | ACAACCTCTTTTCTCATTTCCACGA |
| <i>Tnf ·</i>   | TCAGTTCTATGGCCCAGACCC   | GTCTTTGAGATCCATGCCGTT     |
| <i>Nppa</i>    | TCGTCTTGGCCTTTTGGCT     | TCCAGGTGGTCTAGCAGGTTCT    |
| <i>Nppb</i>    | AAGTCCTAGCCAGTCTCCAGA   | GAGCTGTCTCTGGGCCATTTC     |
| <i>Asns</i>    | ATTACGACAGTTCGGGCATC    | TCTCAGTTCGAGACCGTGTC      |
| <i>Mthfd2</i>  | AATTTGGGCTTTGCAGTGAC    | AACTCCCAAAGAGCAGCTG       |
| <i>Ddit3</i>   | CCAGAATAACAGCCGGAACC    | ATCCTCATACCAGGCTTCCA      |
| <i>Trib3</i>   | CGCTTTGTCTTCAGCAACTGT   | TCATCTGATCCAGTCATCAG      |
| <i>Fgf21</i>   | ACCTCTACACAGATGACGACCA  | AGAAACCTAGAGGCTTTGACACC   |
| <i>Gdf15</i>   | GCTGCTACTCCGCGTCAACC    | CTACCCGTAAGCGCAGTTCC      |
