# Supplementary material for: High Levels of Frataxin Overexpression Lead to Mitochondrial and Cardiac Toxicity in Mouse Models
Source: PubMed Central journal article supplement — Mol Ther Methods Clin Dev. 2020 Sep 1;19:120–38. doi: 10.1016/j.omtm.2020.08.018 (PMC7648087; doi:10.1016/j.omtm.2020.08.018), 2020-09-01
Supplement: mmc3.pdf [file mmc3.pdf]

# High Levels of Frataxin Overexpression Lead to Mitochondrial and Cardiac Toxicity in Mouse Models

Brahim Belbellaa,<sup>1,2,3,4,6</sup> Laurence Reutenauer,<sup>1,2,3,4</sup> Nadia Messadeg,<sup>1,2,3,4</sup> Laurent Monassier,<sup>5</sup> and Hélène Puccio<sup>1,2,3,4,7</sup>

<sup>1</sup>Institut de Génétique et de Biologie Moléculaire et Cellulaire (IGBMC), Illkirch 67404, France; <sup>2</sup>Institut National de la Santé et de la Recherche Médicale, U1258, Illkirch 67404, France; <sup>3</sup>Centre National de la Recherche Scientifique, UMR7104, Illkirch 67404, France; <sup>4</sup>Université de Strasbourg, Illkirch 67404, France; <sup>5</sup>Laboratoire de Pharmacologie et Toxicologie NeuroCardiovasculaire EA7296, Faculté de Médecine, Strasbourg 67085, France

**Friedreich ataxia (FA) is currently an incurable inherited mitochondrial disease caused by reduced levels of frataxin (FXN). Cardiac dysfunction is the main cause of premature death in FA. Adeno-associated virus (AAV)-mediated gene therapy constitutes a promising approach for FA, as demonstrated in cardiac and neurological mouse models. While the minimal therapeutic level of FXN protein to be restored and biodistribution have recently been defined for the heart, it is unclear if FXN overexpression could be harmful. Indeed, depending on the vector delivery route and dose administered, the resulting FXN protein level could reach very high levels in the heart, cerebellum, or off-target organs such as the liver. The present study demonstrates safety of FXN cardiac overexpression up to 9-fold the normal endogenous level but significant toxicity to the mitochondria and heart above 20-fold. We show gradual severity with increasing FXN overexpression, ranging from subclinical cardiotoxicity to left ventricle dysfunction. This appears to be driven by impairment of the mitochondria respiratory chain and ultrastructure, which leads to cardiomyocyte subcellular disorganization, cell death, and fibrosis. Overall, this study underlines the need, during the development of gene therapy approaches, to consider appropriate vector expression level, long-term safety, and biomarkers to monitor such events.**

## INTRODUCTION

Friedreich ataxia (FA) is a rare neurodegenerative disease characterized by spinocerebellar and sensory ataxia associated with hypertrophic cardiomyopathy (HCM).<sup>1</sup> Cardiac dysfunction is the main cause of premature death in FA patients.<sup>2</sup> 95% of FA patients present a homozygous (GAA) expansion within the first intron of the frataxin gene (*FXN*).<sup>3</sup> This pathological expansion causes the heterochromatinization of the locus leading to reduced transcription of the *FXN* gene.<sup>4</sup> *FXN* is a highly conserved mitochondrial protein regulating the biosynthesis of iron sulfur clusters (Fe-S) through an interaction with the *de novo* Fe-S complex assembly machinery.<sup>5</sup> Fe-S are prosthetic groups crucial for many biological functions, including the

mitochondrial respiratory chain; heme, lipid acid, and molybdenum biosynthesis; tRNA thiolation; and iron metabolism.<sup>6–9</sup> Frataxin deficiency leads to impaired Fe-S biogenesis, impairment of Fe-S enzymes, mitochondrial dysfunction, iron metabolism dysregulation, and eventually cellular dysfunction and death.<sup>10,11</sup>

The therapeutic potential of AAV-mediated *in vivo* gene therapy in preventing and rescuing mitochondrial dysfunction associated with *FXN* deficiency, both in cardiac and neurological tissues, has clearly been demonstrated in several mouse studies.<sup>12–14</sup> To successfully translate these initial proof-of-concept studies to the clinic, we undertook to define the therapeutic thresholds conditioning the rescue of the cardiac phenotype as well as the potential toxic effects associated with *FXN* overexpression. This first point was addressed in a recent publication describing the dose-response studies we have conducted in the cardiac *Mck* conditional knockout mouse model (or *Mck* mouse), which recapitulates most features of the FA cardiomyopathy.<sup>10,15</sup> We demonstrated that the therapeutic outcome of AAV-*FXN* gene therapy is directly and proportionally correlated with the vector biodistribution in the heart. The correction of only half the cardiomyocyte was sufficient to restore fully the cardiac morphology and function.<sup>15</sup> Regarding the maximum level of *FXN* protein expression tolerated, earlier mouse studies have reported that the constitutive overexpression of *FXN* in muscle and heart up to 6-fold the normal level was innocuous.<sup>16,17</sup> In contrast, several recent studies have

Received 30 March 2020; accepted 27 August 2020;  
<https://doi.org/10.1016/j.omtm.2020.08.018>.

<sup>6</sup>Present address: Adverum Biotechnologies Inc., 800 Saginaw Drive, 94027 Redwood City, California, USA.

<sup>7</sup>Present address: Institut NeuroMyoGene, UMR5310 INSERM U1217, Université Claude Bernard Lyon I, Faculté de Médecine, 8 Avenue Rockefeller, 69008 Lyon, France.

**Correspondence:** Brahim Belbellaa, Adverum Biotechnologies Inc., 800 Saginaw Drive, 94027 Redwood City, California, USA.

**E-mail:** [bbellaa@adverum.com](mailto:bbellaa@adverum.com)

**Correspondence:** Hélène Puccio, Institut NeuroMyoGene, UMR5310 INSERM U1217, Université Claude Bernard Lyon I, Faculté de Médecine, 8 Avenue Rockefeller, 69008 Lyon, France.

**E-mail:** [helene.puccio@inserm.fr](mailto:helene.puccio@inserm.fr)

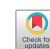

suggested otherwise when constitutive or induced FXN overexpression reach higher levels in yeast (>14-fold),<sup>18</sup> HEK293 inducible cell line (>13-fold),<sup>19</sup> and transgenic *Drosophila* (>9-fold).<sup>20,21</sup> However, the possible toxicity of similar levels of FXN overexpression were never investigated in preclinical relevant animal models (i.e., rodent or large animal models) or in the context of AAV-mediated gene therapy.

In the present study, we investigated whether *in vivo* AAV-mediated gene transfer could be detrimental in wild-type (WT) mice or frataxin-deficient *Mck* mice. We evaluated FXN overexpression *in vivo* and its functional and morphological consequences on mitochondria and the heart. FXN protein expression over 20-fold the endogenous level is toxic for the mitochondria and results in severe impairment of complexes I and II enzymatic activity, alteration of the mitochondria ultrastructure, cardiomyocyte cell death, and fibrosis leading to heart dysfunction. This was also associated with an increased mitochondria biomass in cardiomyocytes and the induction of the integrated stress response (ISR). Overexpression of frataxin up to 9-fold the endogenous level in the cardiac tissue was uneventful, suggesting that the maximum safe level of FXN overexpression is between 9- and 20-fold the normal level. Strikingly, liver overexpression of FXN >90-fold the normal level did not result in any detectable toxicity, suggesting organs specific susceptibility to FXN overexpression in mice.

## RESULTS

### FXN Overexpression Leads to Impairment of Mitochondria Succinate Dehydrogenase (SDH) Activity

Previously, we conducted a dose-response study in 5-week-old *Mck* mice injected intravenously with decreasing doses of AAVRh.10-CAG-hFXN-HA vector, from  $5 \times 10^{13}$  down to  $1 \times 10^{12}$  vector genomes (vg)/kg.<sup>15</sup> Upon sacrifice at 12 weeks of age, the human FXN (hFXN) protein level measured in the heart by ELISA assay ranged from 2 to 10,927 ng of FXN per mg of total heart protein (ng/mg). In WT 9-week-old C57/B6J mice ( $n = 6$ ), the mouse FXN protein level measured by ELISA in the heart was  $147 \pm 42$  ng/mg. Despite more than 70-fold overexpression, the cardiac function and morphology of treated *Mck* mice was rescued. In the present study, we performed additional histological analysis on the heart tissue sections from the same *Mck* mice to further investigate the relationship between FXN overexpression in the heart and the rescue of mitochondrial metabolism (Table S1). Unexpectedly, the heart tissue sections from *Mck* mice treated at the highest dose of vector (i.e.,  $5 \times 10^{13}$  vg/kg) displayed regions with very high level of hFXN-HA expression, where SDH enzymatic activity was systematically impaired (Figures 1A and S1). This was particularly obvious in the mouse with the highest cardiac vector biodistribution (7.68 per diploid genome on average) and protein concentration (10,927 ng/mg, or 74-fold the endogenous level) (Figure 1A, first row). No SDH impairment was observed in the cardiomyocytes expressing much lower hFXN-HA levels or neighboring these hotspots of expression. Quantification of the heart surface positive for SDH enzymatic activity in the *Mck* mice treated with the highest dose ( $n = 3$ ;  $73\% \pm 2\%$ ) in comparison to NaCl-injected WT mice ( $n = 7$ ;  $83\% \pm 4\%$ ) revealed that less than

12% of the total heart surface was affected. These hotspots were not associated with cardiomyocyte cell death, fibrosis, or cell infiltrations, as assessed by hematoxylin and eosin (H&E) and wheat germ agglutinin (WGA) staining of adjacent heart tissue sections, in comparison to untreated *Mck* mice (Figure 1B). Interestingly, the cardiomyocytes with high hFXN-HA expression and SDH activity impairment did not show any iron accumulation following Perls-DAB (3,3'-Diaminobenzidine) staining of  $\text{Fe}^{3+}$  (Figure 1C), as this would be expected following FXN deficiency and/or Fe-S biosynthesis impairment.<sup>10,22</sup>

Importantly, the left ventricle (LV) function of these mice did not appear substantially impaired at rest at 12 weeks of age (Figures 1D–1F and S1A–S1C). *Mck* mice treated at  $5 \times 10^{13}$  vg/kg displayed LV shortening fraction (SF) and cardiac blood output normalized to body weight (CO/BW) corrected to WT levels (Figures 1D and 1E), similar to *Mck* mice treated at  $2.5 \times 10^{13}$  vg/kg. Importantly, *Mck* mice treated at  $5 \times 10^{13}$  vg/kg displayed a sustained functional rescue at long term (Figures S1D–S1H) when evaluated by echocardiography until 25 weeks of age in a separate cohort of mice ( $n = 5$ ; Table S1). Most likely, this is explained by the relative small proportion of cardiomyocytes and heart surface affected overall (<12%). Indeed, we showed previously that the functional rescue of the cardiac phenotype is achieved with as low as 50%–60% of heart surface corrected.<sup>15</sup> It is worth noting that these mice did not display significant LV hypertrophy (Figure 1F), but the LV diameters at the end systole (LV-ESD) and diastole (LV-EDD) appeared slightly higher in the mouse treated at  $5 \times 10^{13}$  vg/kg and expressing 74-fold the normal level of FXN (Figures S1A and S1B). Overall, these results suggested that a very high level of hFXN-HA protein in cardiomyocytes could lead to impaired mitochondrial SDH enzymatic activity but without notable iron accumulation.

### Overexpression of human FXN in WT Mice Leads to Mitochondrial and Cardiac Toxicity

In order to rule out any potential confounding effects from the *Mck* mouse cardiac phenotype, we undertook to replicate these experimental conditions in WT C57/B6J mice. WT mice received  $5 \times 10^{14}$  vg/kg ( $n = 4$ ) or  $5 \times 10^{13}$  vg/kg ( $n = 3$ ) of the same AAVRh.10-CAG-hFXN-HA vector at 7 weeks of age (Table S1). At the  $5 \times 10^{14}$  vg/kg dose, we were able to replicate similar vector copy number (VCN) ( $\geq 7$ ) and hFXN-HA expression ( $\geq 10,000$  ng/mg) (Figures 2A–2C), as reported above in *Mck* mice treated at  $5 \times 10^{13}$  vg/kg. However, one-log higher of vector dose was required in WT mice to achieve the same vector biodistribution and overexpression as in *Mck* mice. This might suggest a difference of transgene expression between WT and *Mck* mice. However, no significant difference in hFXN-HA expression when normalized to the vector copy number was observed between treated WT mice ( $n = 7$ ) and *Mck* mice ( $n = 35$ ) (Figure S2). At the study endpoint, 21 weeks of age, all treated WT mice were alive, with normal BW growth curve (Figure 2D) and no behavioral sign of stress or suffering. At necropsy, no gross anatomical anomaly was observed at the levels of the heart, lung, liver, kidney, digestive tract, or skeletal muscles.

The consequences of hFXN overexpression on the heart histology were evaluated following H&E and WGA staining, performed on

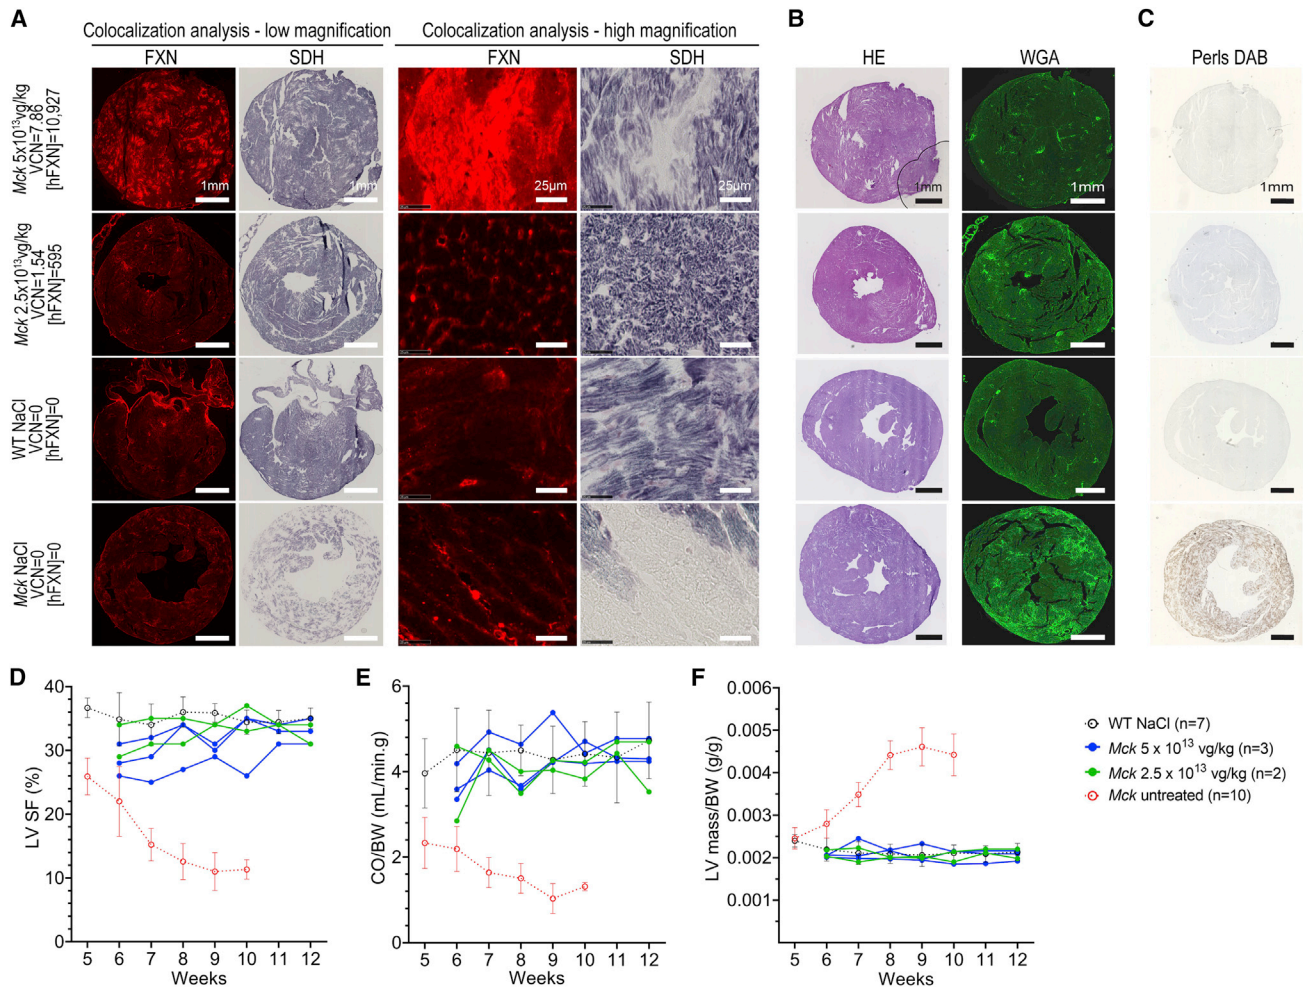

**Figure 1. High Expression of FXN-HA in Cardiomyocytes Is Associated with Impaired Succinate Dehydrogenase (SDH) Enzymatic Activity despite Functional Rescue of *Mck* Mice Treated with AAVrh.10-CAG-hFXN-HA**

(A–C) Histological analysis of heart tissue sections collected from the *Mck* mice treated at 5 weeks of age with the AAVrh.10-CAG-hFXN-HA vector and sacrificed at 12 weeks. Representative images are from the *Mck* mouse treated with  $5 \times 10^{13}$  vg/kg and expressing the highest level of hFXN-HA (10,927 ng/mg) and from another *Mck* mouse treated with  $2.5 \times 10^{13}$  vg/kg and with lower hFXN-HA level (695 ng/mg). For controls, heart tissue sections from 12-week-old NaCl-injected wild-type (WT) mice and 9-week-old untreated *Mck* mice were also analyzed. The corresponding vector copies per diploid genome (VCN) and tissue concentration in human FXN ([hFXN]) in ng per mg of total protein are reported. The same time exposure was used for all animals. (A) Co-staining and co-localization analysis of hFXN-HA overexpression and SDH enzymatic activity. Acquisitions of a single microscopic field at low and high magnification are shown, to compare the distribution of hFXN-HA expression hotspots and SDH activity impairment. (B) Hematoxylin and eosin (H&E) and wheat germ agglutinin (WGA) staining. (C) DAB-enhanced Perls labeling of iron deposits with methyl green counterstaining. (D–F) Longitudinal echocardiography analysis of the same *Mck* mice, represented here as individual kinetics. Data are represented as mean  $\pm$  SD for WT control mice ( $n = 7$ ) and untreated *Mck* mice ( $n = 10$ ). For untreated *Mck* mice, historical data were plotted. Statistical analyses are reported in Table S2. (D) Left ventricle (LV) shortening fraction (SF). (E) Cardiac blood output (CO) measured at the aorta and normalized to body weight (BW). (F) LV mass normalized to BW. See also Figures S1A–S1C for the extended echocardiography analysis of this cohort of mice. See also Figures S1D–S1H for the echocardiography follow-up, until 25 weeks of age, of a second cohort of *Mck* mice treated at 5 weeks of age at  $5 \times 10^{13}$  vg/kg. Figure partially adapted from Belbellaa et al.<sup>15</sup>

adjacent heart frozen tissue sections (Figures 2E and S3). Both stains revealed and confirmed sparse fibrotic patches, but only in the animals treated at  $5 \times 10^{14}$  vg/kg and more visibly in the three mice with the highest transgene expression, ranging from 5,206 up to 12,773 ng/mg (i.e., 34- and 85-fold the normal FXN level, respectively) (Figure 2C). Heart tissue sections from WT mice treated at  $5 \times 10^{13}$  vg/kg and NaCl-injected WT mice appeared similar (Fig-

ures 2C and S3). While the overall total extent of heart fibrosis was not statistically different between NaCl-injected WT mice and WT mice treated at  $5 \times 10^{14}$  or  $5 \times 10^{13}$  vg/kg (Figure 2F), the qRT-PCR analysis of *Col1a1*, *Col3a1*, and *Tgf $\beta$ 1* revealed significant increased expression of *Col1a1* and *Col3a1* in the hearts of WT mice treated at  $5 \times 10^{14}$  vg/kg, indicating ongoing fibrosis (Figure 2G).

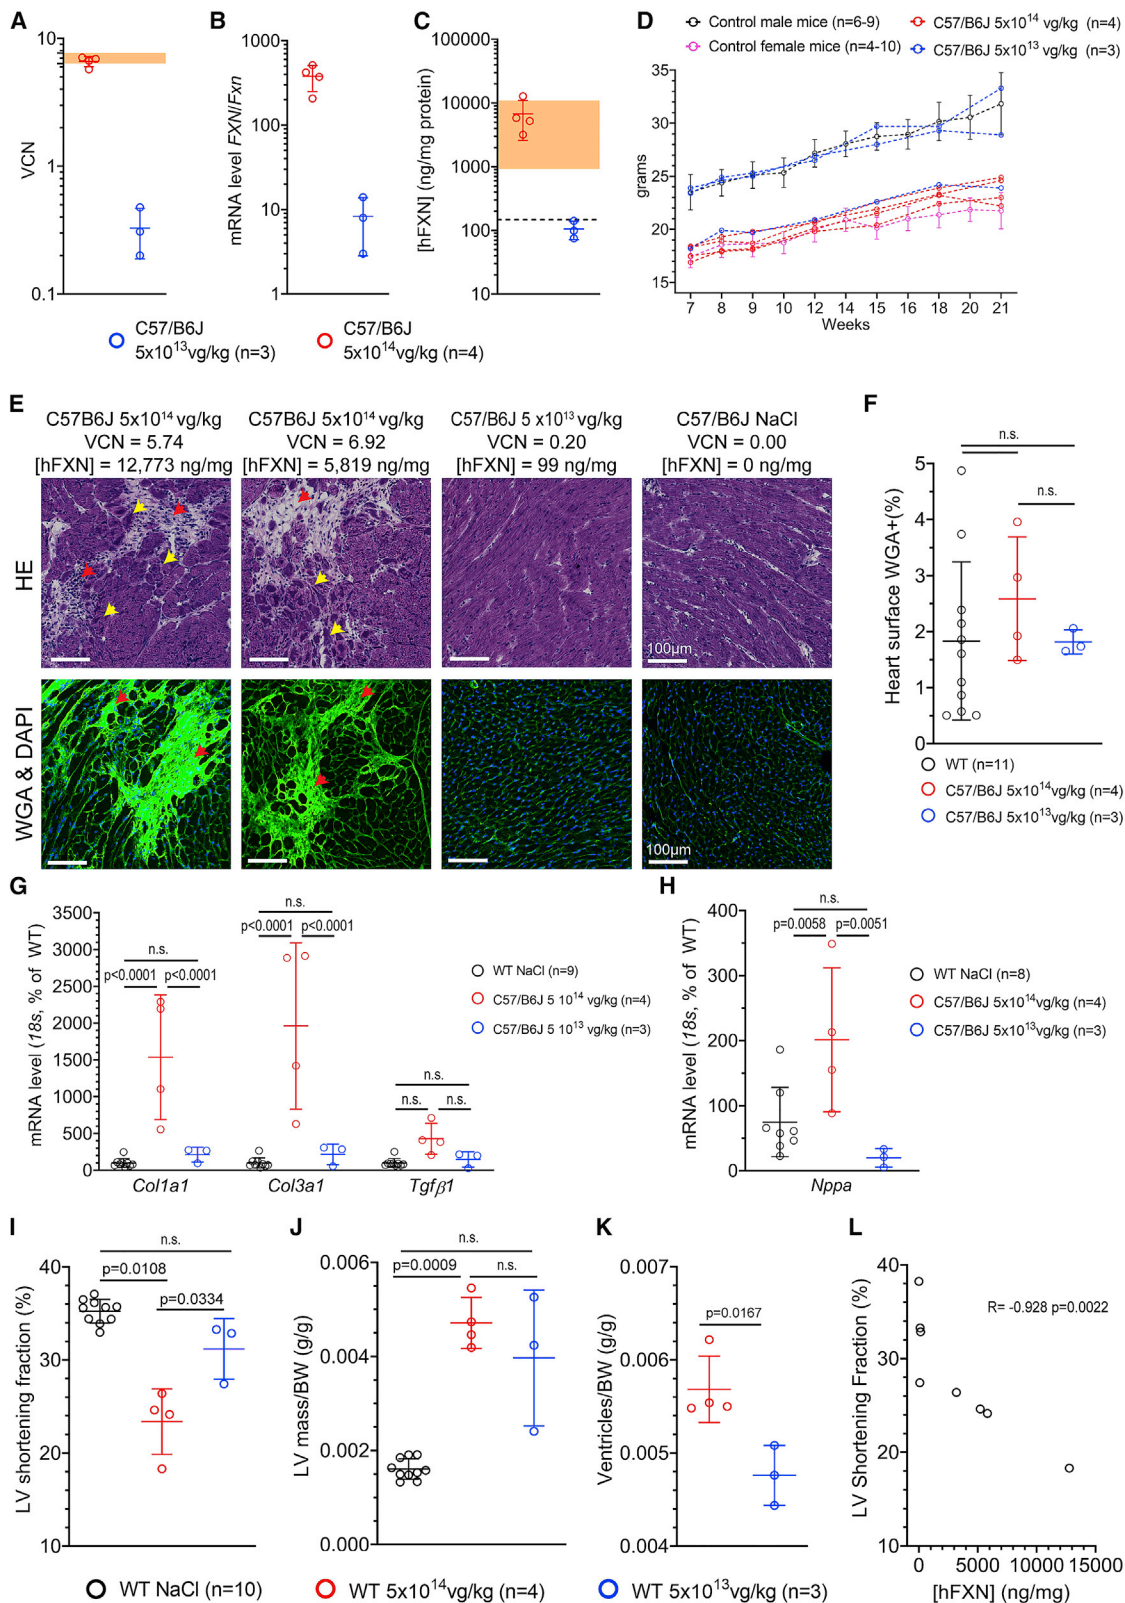

(legend on next page)

While WT mice treated at  $5 \times 10^{14}$  vg/kg displayed significant increased *Nppa* gene expression (Figure 1H), indicative of volume/pressure overload, none of them developed severe cardiac dysfunction at 21 weeks of age (Figures 1I–1K). Nonetheless, the three mice with the highest level of transgene expression in the  $5 \times 10^{14}$  vg/kg group displayed meaningful reduction of LV SF at rest (Figure 2I; Video S1) and increased heart hypertrophy (Figures 2J and 2K). Importantly, no functional or morphologic heart alteration was observed in the mice treated with vehicle or at  $5 \times 10^{13}$  vg/kg. The inverse correlation between hFXN-HA expression and the LV SF was statistically significant (Figure 2L).

To assess the mitochondria function in relation to the level of hFXN-HA expression, semiquantitative histochemical assays were performed on adjacent heart tissue sections. We probed the activity of the respiratory chain complexes I, II, and IV (Figures 3 and S3). As reported in *Mck* mice (Figure 1A), the co-labeling and co-localization analysis of SDH enzymatic activity and hFXN-HA revealed hotspots of transgene expression where the SDH enzymatic activity was strongly reduced (Figure 3). However, the overall heart surface affected was relatively limited (Figure S3), and this was observed only in mice treated at  $5 \times 10^{14}$  vg/kg. SDH enzymatic activity in WT mice treated at  $5 \times 10^{13}$  vg/kg appeared similar to NaCl-injected WT mice (Figures 3 and S3). When quantified, the total surface positive for SDH activity was, respectively,  $95.0\% \pm 2.1\%$  ( $n = 4$ ) and  $98.5\% \pm 0.3\%$  ( $n = 3$ ) in mice treated at  $5 \times 10^{14}$  and  $5 \times 10^{13}$  vg/kg. Of note, the SDH staining and image acquisition and quantification were performed in batch, with all individuals from a given study processed in a single run, including untreated WT and *Mck* controls. However, there were some variations from one run to another, at different steps and especially during the image quantification, which thresholding result led to bias in the background signal. This explains the difference in WT mice values between the analysis of this cohort of mice and the one reported earlier. WT mice treated at  $5 \times 10^{14}$  vg/kg also displayed sparse impairment of the enzymatic activity of complex I (NADH-ubiquinone oxidoreductase [NADH]), contrary to WT mice treated at  $5 \times 10^{13}$  vg/kg. In contrast, the enzymatic activity of complex IV (cytochrome C oxidase [COX]) seemed unaffected in

both dose groups (Figures 3 and S3). Strikingly, these results were reminiscent of what is observed in the heart of untreated *Mck* mice, in which FXN deficiency leads to the impairment of Fe-S enzymes, including SDH and NADH, but not COX, dependent on heme cofactors and not Fe-S cofactors.<sup>23</sup>

The consequences of FXN overexpression on the cardiomyocyte ultrastructure were also assessed by transmission electron microscopy (TEM). In contrast to WT mice treated at  $5 \times 10^{13}$  vg/kg or NaCl, WT mice treated at  $5 \times 10^{14}$  vg/kg displayed a substantial proportion of cardiomyocytes with severe alterations of their subcellular organization, with scattered and disordered myofibrils (Figure 3). Their mitochondria were swollen with sparse cristae, whose stacking is crucial for mitochondria bioenergetic efficiency.<sup>24</sup> The total volume occupied by mitochondria in cardiomyocytes also appeared significantly increased, suggesting altered mitochondrial proliferation or turnover. We also frequently observed the presence of electron-dense bodies inside the mitochondria matrix. These were not reminiscent of collapsed cristae or iron deposits, as commonly observed in FA patients and untreated *Mck* mouse cardiomyocytes.<sup>10,25,26</sup> To rule out the presence of mitochondrial iron deposits, adjacent ultrathin sections were stained with bismuth subnitrate to label iron complexed with ferritin, in the mitochondria as well as in lysosomes.<sup>25,27–29</sup> All WT mice displayed lysosomal labeling, as expected, since this organelle is central to ferritin turnover, but none showed mitochondrial labeling in contrast to untreated *Mck* mice (Figure 3). Collectively, these observations rule out iron accumulation as part of the cardio- and mitochondrial toxicity mechanism, which is in line with the lack of Perls labeling observed in treated *Mck* mice (Figure 1C).

To further investigate the mitochondria biomass, heart tissue sections from the same WT mice were co-labeled for SDH enzymatic activity and for prohibitin (PHB) (Figure 4A). PHB is a ubiquitous protein predominately located in the mitochondrial inner membrane,<sup>30</sup> which we used previously to assess mitochondria biomass.<sup>15</sup> In line with the above TEM observations, WT mice treated at  $5 \times 10^{14}$  vg/kg displayed a substantial increase of PHB labeling, but

## Figure 2. High Level of FXN-HA Overexpression in the Heart of WT Mice Treated with AAVrh.10-CAG-hFXN-HA Vector Is Associated with Cardiac Fibrosis and Subclinical Impairment of Heart Function and Morphology

WT C57/B6J mice were treated at 7 weeks of age at  $5 \times 10^{14}$  ( $n = 4$ , red) or  $5 \times 10^{13}$  ( $n = 3$ , blue) vg/kg and sacrificed at 21 weeks. Unless stated otherwise, individual data points are plotted, with mean and SD. (A) qPCR quantification of the VCN in the heart. Light orange area represents the VCN range in *Mck* mice treated at  $5 \times 10^{13}$  vg/kg ( $n = 3$ ) with the same vector from a previous study.<sup>15</sup> (B) qRT-PCR analysis of the transgene mRNA level normalized to mouse *Fxn* mRNA level. (C) ELISA assay quantification of hFXN-HA protein concentration ([hFXN]) in the heart, normalized to mg of total heart protein. Light orange area represents the [hFXN] range in *Mck* mice treated at  $5 \times 10^{13}$  vg/kg ( $n = 3$ ) from a previous study and reported in Figure 1.<sup>15</sup> Black dotted line represents the endogenous level of FXN in untreated WT mice. (D) BW reported as individual, with males in blue and females in red. For untreated WT mice, historical data were plotted as mean  $\pm$  SD. (E) Representative images from the histological analysis of adjacent heart tissue section collected from WT mice ( $5 \times 10^{14}$ ,  $n = 4$ ;  $5 \times 10^{13}$ ,  $n = 3$ ) and stained with HA or WGA. Red arrows indicate fibrosis and cell infiltrates and yellow arrows indicate cardiomyocytes displaying subcellular disorganization. VCN and [hFXN] values are reported above for each animal. See also Figure S3 for the extended histological analysis. (F) Quantification of heart surface labeled with WGA. NaCl-injected WT mice sacrificed at 15 or 22 weeks of age ( $n = 11$ ) were used as control. Brown-Forsythe and Welch one-way ANOVA statistical test, p values are reported with n.s.  $p > 0.05$ . (G–H) qRT-PCR quantification of cardiac gene expression normalized to *18S* and reported as percentage of NaCl-treated WT mice ( $n = 9$ ). (G) *Col1a1*, *Col3a1*, and *Tgfb1* mRNA level. Two-way ANOVA and FDR 5% statistical test, p values are reported with n.s.  $p > 0.05$ . (H) *Nppa* mRNA level. Brown-Forsythe and Welch one-way ANOVA test, p values are reported with n.s.  $p > 0.05$ . (I and J) Echocardiography at 21 weeks of age. For control, historical data from 21-week-old WT mice treated with NaCl are reported. Brown-Forsythe and Welch one-way ANOVA test, p values are reported with n.s.  $p > 0.05$ . (I) LV SF. (J) LV mass normalized to BW. (K) Heart ventricle weight measured upon necropsy at 21 weeks of age, normalized to BW. (L) Correlation analysis between [hFXN] and LV SF. Spearman non-parametric correlation coefficient and p value are reported.

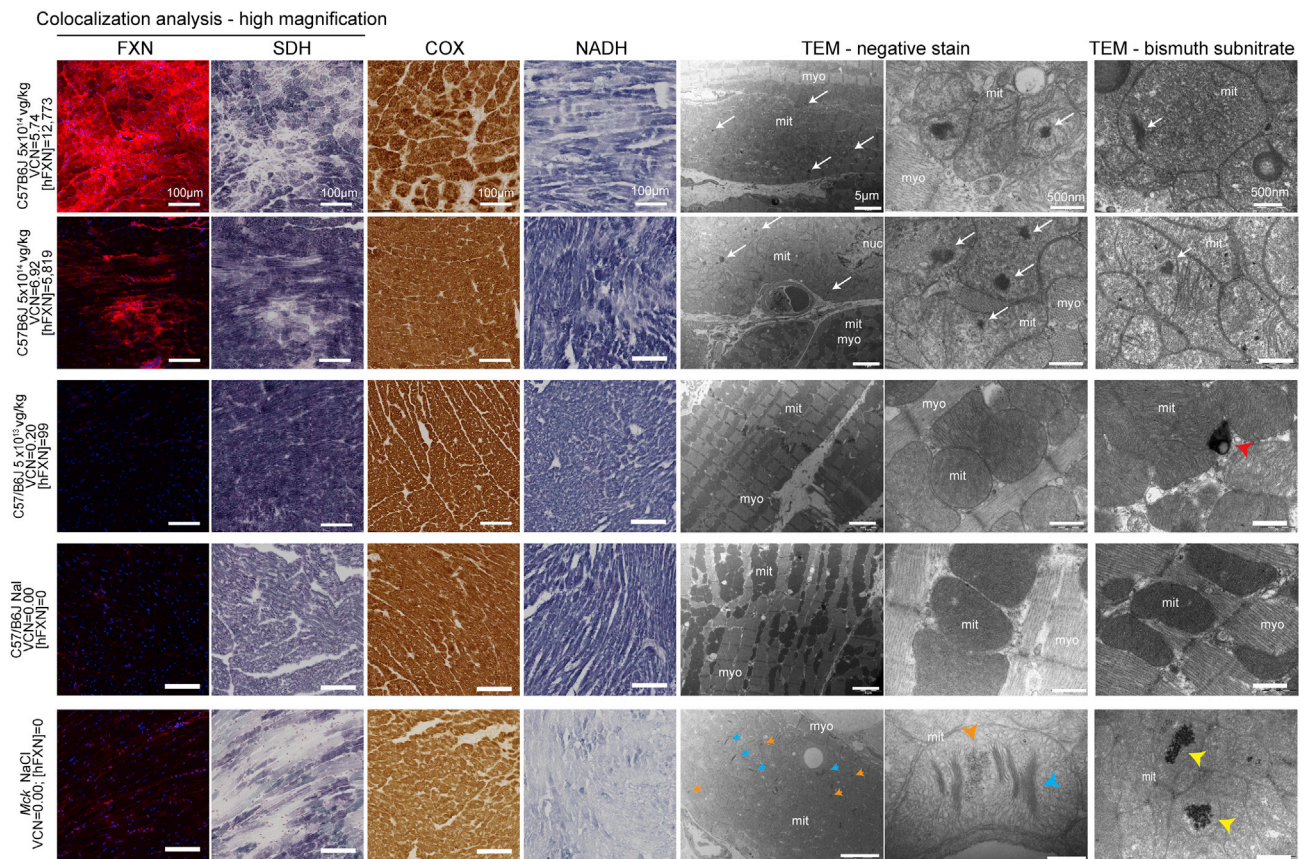

**Figure 3. High Level of FXN-HA Overexpression in WT Mice Cardiomyocytes Leads to Mitochondrial Function and Structure Impairment**

Representative histological observations from the correlative analysis of adjacent heart tissue sections/sample from WT mice treated at 7 weeks of age with AAVRh.10-CAG-hFXN-HA vector ( $5 \times 10^{14}$  vg/kg,  $n = 4$ ;  $5 \times 10^{13}$  vg/kg,  $n = 3$ ) and sacrificed at 21 weeks. For controls, 21-week-old NaCl-injected WT mouse ( $n = 1$ ) and 9-week-old untreated *Mck* mice ( $n = 2$ ) were also analyzed. Each image series corresponds to the same individual for which dose of vector, VCN, and [hFXN] are reported. From left to right, co-staining and co-localization analysis of hFXN-HA protein expression and SDH enzymatic activity, cytochrome C oxidase (COX), and NADH-ubiquinone oxidoreductase (NADH) enzymatic activities assessed by *in situ* histochemical assay are shown. Transmission electron microscopy (TEM) observations at low and high magnification of the LV myocardium is shown, following negative stain performed to assess cardiomyocyte and mitochondria ultrastructure. Finally, TEM observations of adjacent ultrathin sections at high magnification following bismuth sodium tartrate labeling of iron-ferritin complexes are shown. White arrows indicate non-iron mitochondrial electron-dense bodies, blue arrowheads indicate collapsed mitochondrial cristae, orange arrowheads indicate mitochondrial iron deposits, yellow arrowheads indicate mitochondrial iron-ferritin complex accumulation in mitochondria, and red arrowheads indicate ferritin sequestered in the lysosome. myo, myofibrils; mito, mitochondria; nuc, nucleus. See also Figure S3 for extended histological analysis.

less than untreated *Mck* mice. In WT mice treated at  $5 \times 10^{14}$  vg/kg, we also observed a substantial co-localization between increased PHB labeling and reduction of SDH enzymatic activity. In contrast, WT mice treated at  $5 \times 10^{13}$  vg/kg appeared similar to NaCl-injected WT mice. Interestingly, WT mice treated at  $5 \times 10^{14}$  vg/kg also displayed increased cardiac gene expression for *Asns*, *Mthfd2*, and *Ddit3*, hallmark genes of the ISR (Figure 4C). The expression of *Fgf21* and *Gdf15*, which are downstream target genes of the ISR, were also strongly increased, although only statistically significant for *Fgf21* (Figures 4D and 4E). Interestingly, *Fgf21* and *Gdf15* have been proposed as biomarkers of mitochondria and heart dysfunction.<sup>31,32</sup>

Altogether, these results suggest that cardiac overexpression of hFXN-HA  $\geq 20$ –30-fold the normal endogenous level is toxic for

the heart and mitochondria. The mitochondria toxicity is characterized by severe alterations of the mitochondria ultrastructure and bioenergetics and the induction of ISR.

#### High Level of FXN Overexpression Results in Acute Cardiotoxicity and Compromised the Gene Therapy Outcome

While the study in WT mice recapitulated and confirmed the mitochondrial toxicity observed initially in *Mck* mice, it was unclear if this toxicity could also be explained by the high dose of vector administered, the resulting high number of vector copies per cell, and/or the HA tag fused to transgene (Figure 5A). To address these questions, we designed an optimized expression cassette and vector, AAVRh.10-hFXN (Figure 5B). The 5' UTR and Kozak sequences were optimized. The hFXN cDNA was not codon optimized, but the HA tag was

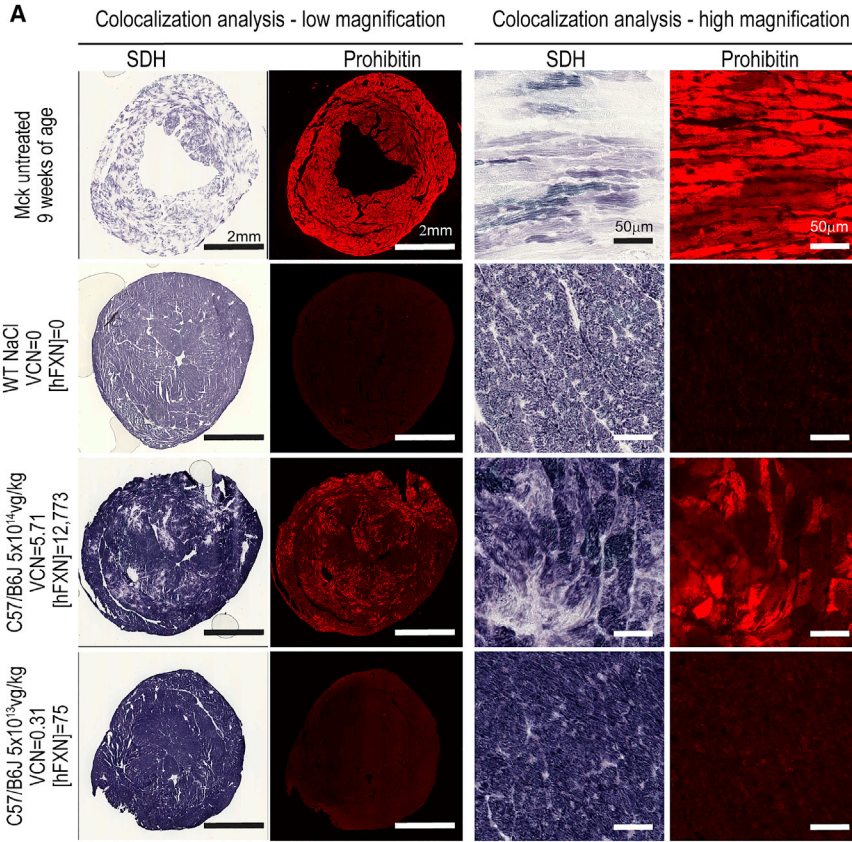

**Figure 4. Cardiotoxic Overexpression of FXN-HA Is Associated with Increased Mitochondria Biomass and the Induction of the Integrated Stress Response**

(A) Co-labeling and co-localization observation for prohibitin (Phb) and the enzymatic activity of SDH, on heart tissue sections from WT mice treated with AAVRh.10-hFXN-HA ( $5 \times 10^{14}$ ,  $n = 4$ ;  $5 \times 10^{13}$ ,  $n = 3$ ). For controls, NaCl-injected WT and untreated *Mck* mice are represented. For each image series, the dose of vector, VCN, and [hFXN] are reported. (B-D) qRT-PCR analysis of heart mRNA levels reported to *18s* or *Hprt* (depending on the abundance of the target gene) and reported as percentage of NaCl-injected WT mice level. Individual data points are reported, with mean and SD. Brown-Forsythe and Welch ANOVA test, p values are reported with n.s.  $p > 0.05$ . (B) Integrated stress response (ISR) hallmark genes. (C and D) Downstream ISR-target genes encoding for secreted proteins (C) *Fgf21* and (D) *Gdf15*.

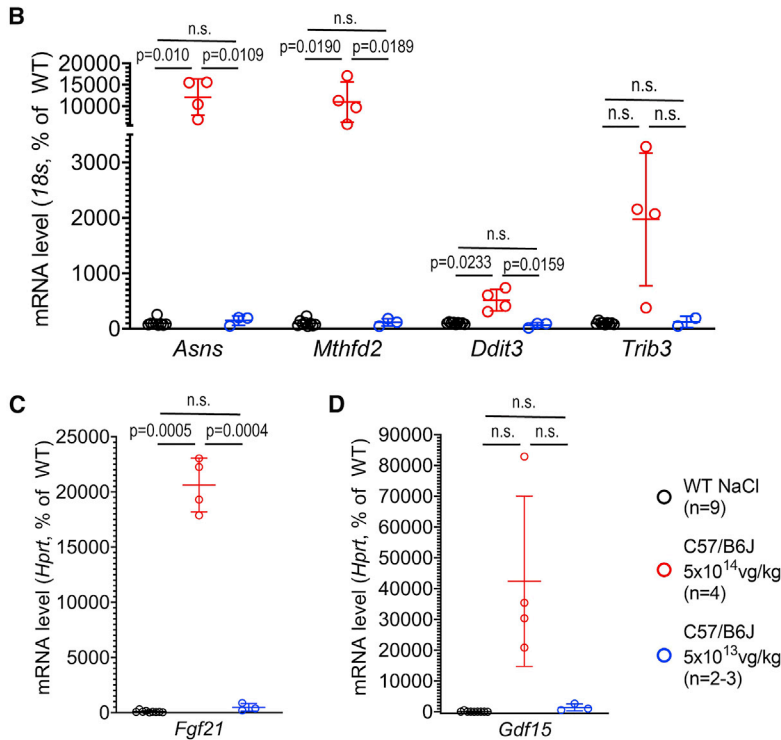

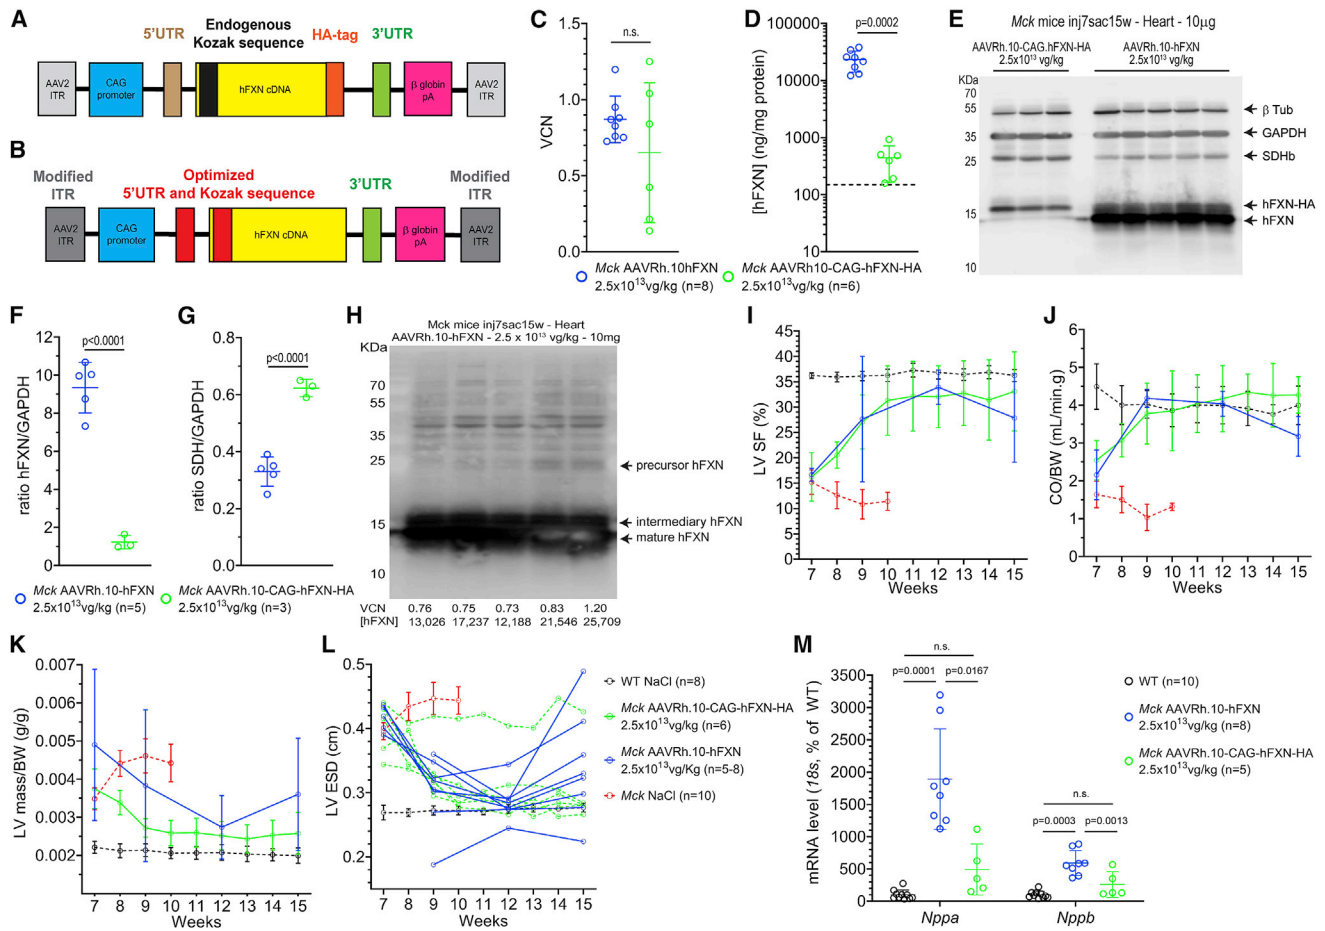

**Figure 5. Cardiotoxicity FXN Overexpression Is Independent of the Dose Administered and Vector Biodistribution and Compromised the Success of Cardiac Gene Therapy in *Mck* Mouse Heart**

*Mck* mice were treated at 7 weeks of age with the non-optimized vector AAVRh.10-CAG-hFXN-HA (n = 6) or with the optimized vector AAVRh.10-hFXN (n = 8) at  $2.5 \times 10^{13}$  vg/kg, followed up by echocardiography, and then sacrificed at 15 weeks of age to perform molecular analysis. NaCl-injected WT (n = 8–10) mice were used as control. (A and B) Schematic description of the vector construct for (A) the non-optimized AAVRh10-CAG-hFXN-HA vector, and (B) the optimized AAVRh.10-hFXN vector. (C) qPCR quantification of the number of VCN in the heart. Individual data points are reported, with mean and SD. Welch’s t test, n.s. for  $p > 0.05$ . (D) ELISA assay quantification of hFXN protein concentration in the heart, normalized to mg of total heart protein. Black dotted line represents the endogenous mouse FXN level in untreated C57/B6J WT mice (i.e.,  $147 \pm 42$  ng/mg) (n = 6). Individual data points are reported, with mean and SD. Welch’s t test, p values are reported. (E) Western blot (WB) analysis of total heart protein extract from *Mck* mice treated with the non-optimized vector (n = 3) or the optimized vector (n = 5). Immunoblotting against FXN, SDHb, GAPDH, and beta-tubulin ( $\beta$ -Tub). (F and G) WB quantification of the relative protein levels of FXN (F) and SDHb (G), normalized to GAPDH. Welch’s t test, p values are reported. (H) WB analysis of FXN protein maturation, in the heart of *Mck* mice treated with the optimized vector (n = 5) and expressing up to 179-fold the normal level of FXN. The dose of vector, VCN, and [hFXN] corresponding to each sample are reported. (I–L) Longitudinal echocardiography analysis. For control, WT mice were injected with NaCl (n = 8), and historical data are plotted for NaCl-injected *Mck* mice (n = 10). Data are reported as mean  $\pm$  SD. Statistical analyses are presented in Table S4. (I) LV SF. (J) CO normalized to BW. (K) LV mass normalized to BW. (L) LV end-systole diameter (LV-ESD) reported as individual kinetic for treated *Mck* mice. See also Figure S4 for LV end-diastole measurement and BW. (M) qRT-PCR quantification of the cardiac gene expression of *Nppa* and *Nppb*, normalized to *18S* and reported as percentage of NaCl-injected WT mice. Brown-Forsythe and Welch ANOVA test, p values are reported with n.s.  $p > 0.05$ .

removed. The same promoter and polyA sequences were used in both vectors (Figures 5A and 5B). In this third mouse study, *Mck* mice at 7 weeks old (upon heart failure) received  $2.5 \times 10^{13}$  vg/kg of the optimized AAVRh.10-hFXN vector (n = 8) or  $2.5 \times 10^{13}$  vg/kg of the non-optimized AAVRh.10-CAG-hFXN-HA vector (n = 6) and were then sacrificed at 15 weeks of age (Table S1). For controls, 7-week-old WT mice received NaCl (n = 10) or the optimized

AAVRh.10-hFXN vector at doses of  $2.5 \times 10^{13}$  (n = 2) or  $5 \times 10^{12}$  vg/kg (n = 1).

When compared to the non-optimized vector, the optimized vector led to much higher levels of hFXN expression in the heart and liver despite similar VCN (Figures 5C–5F, 8A, and 8C–8E). The resulting levels of hFXN protein in the heart were on average



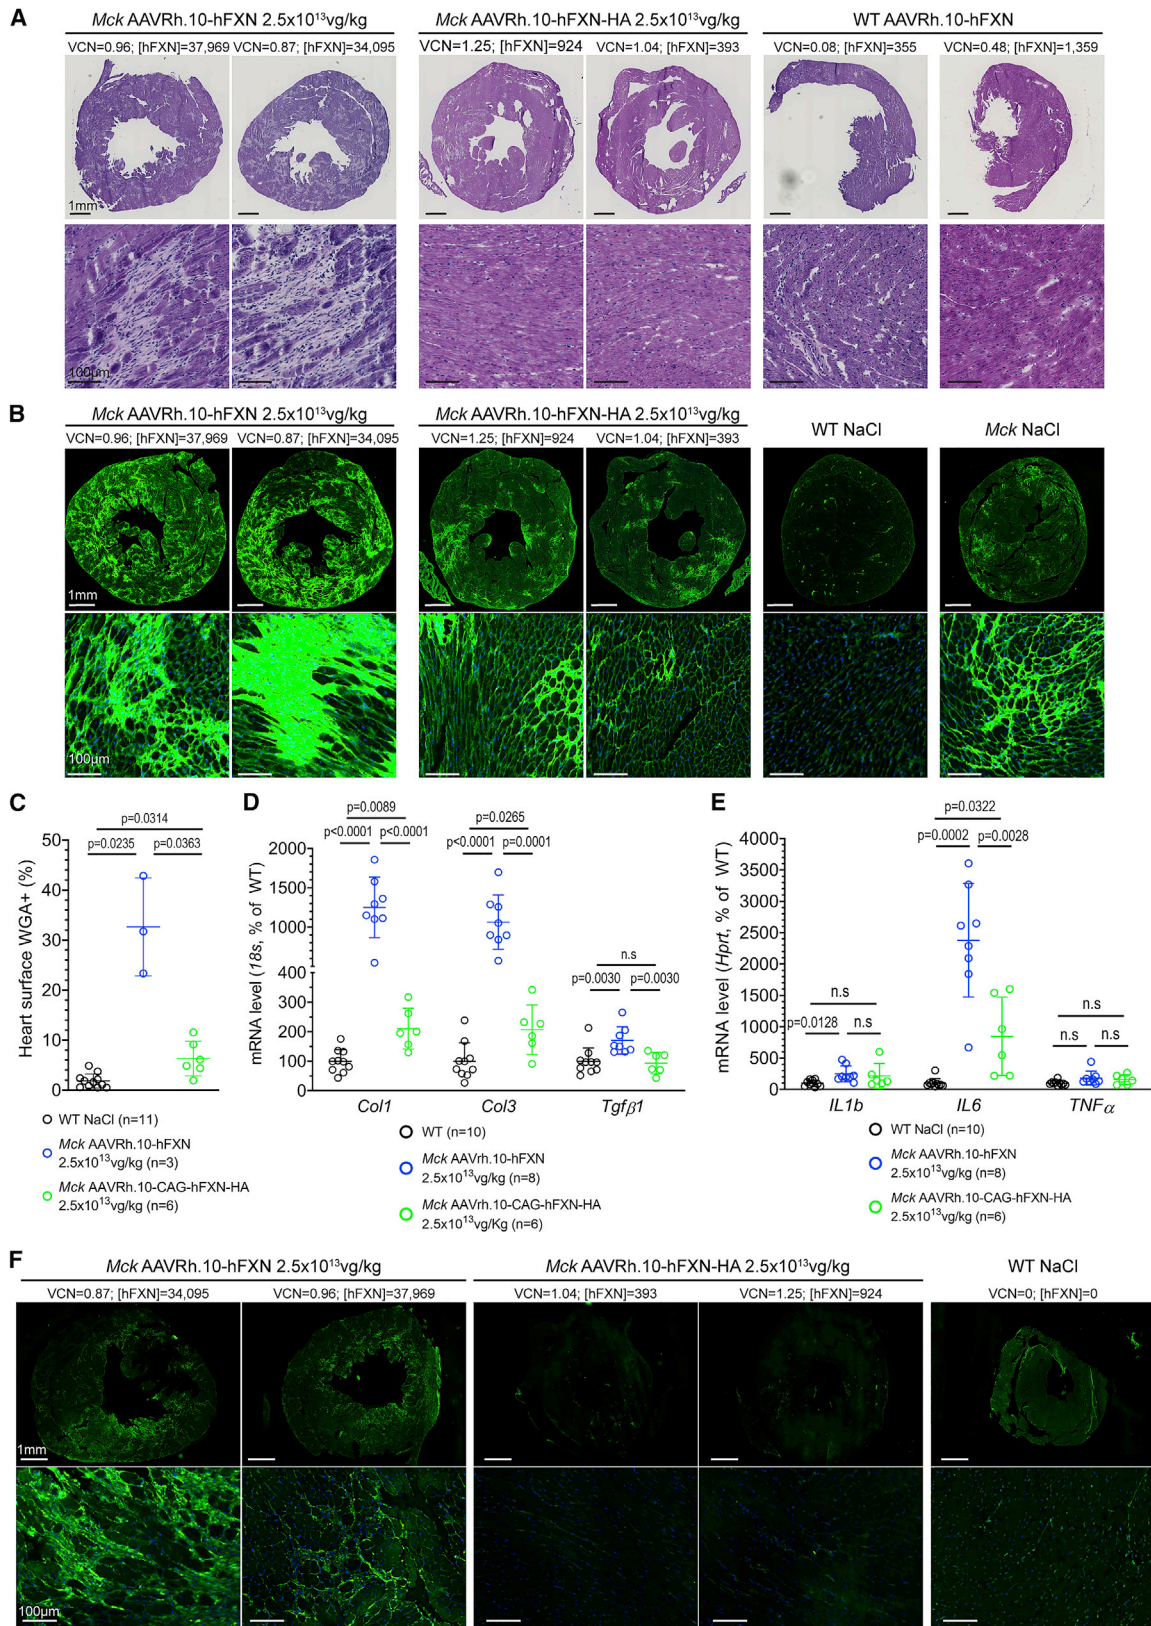

(legend on next page)

23,376 ± 9,336 ng/mg and 441 ± 276 ng/mg, respectively, corresponding to 156-fold and 2.9-fold the endogenous FXN level (Figure 5D). This large difference in expression was confirmed by western blot analysis (Figures 5E and 5F). Despite the very high overexpression in *Mck* mice treated with the optimized vector, no significant accumulation of hFXN precursor (23 kDa) was observed (Figure 5H). While we observed some accumulation of the hFXN intermediary form (19 kDa), the vast majority was processed into the mature form (14 kDa). These results suggest that the majority of the transgenic hFXN protein was targeted to the mitochondria, without severe saturation or impairment of the mitochondria import and processing capacity.<sup>33</sup> Of note, the biodistribution and expression of the optimized AAVRh.10-hFXN vector was also quantified in WT mice treated at  $2.5 \times 10^{13}$  (n = 2) or  $5 \times 10^{12}$  vg/kg (n = 1). The vector biodistribution was similar to *Mck* mice treated at identical doses,<sup>15</sup> with, respectively, 0.983 and 0.475 VCN at  $2.5 \times 10^{13}$  vg/kg and 0.078 VCN at  $5 \times 10^{12}$  vg/kg. In contrast, the vector expression was much lower compared to *Mck* mice treated with the same vector, with, respectively, 5,963 and 3,526 ng/mg at  $2.5 \times 10^{13}$  vg/kg and 355 ng/mg at  $5 \times 10^{12}$  vg/kg.

The expression normalized to the VCN of the optimized vector was 35-fold higher than the expression of the non-optimized vector in the heart of *Mck* mice (Figure S2). As mentioned above, the expression of the non-optimized AAVRh.10-CAG-hFXN-HA vector was similar in the heart of WT and *Mck* mice (Figure S2), despite the significant transcriptional and metabolic dysregulations occurring upon mouse FXN depletion.<sup>10,12,15,34</sup> In contrast, the expression normalized to the VCN of the optimized AAVRh.10-hFXN vector was on average 5-fold higher in the heart of *Mck* mice than in WT mice (Figure S2). This increased expression is possibly driven by the strong induction of the ISR and EIF2 $\alpha$  phosphorylation in *Mck* mouse heart,<sup>34</sup> which might favorably impact the transcription and translation of the optimized expression cassette, in part through the optimized 5' UTR and Kozak sequence. In line with this hypothesis, both vectors displayed similar VCN and transcription levels in the liver of *Mck* mice (Figures 8A and 8B), which is not depleted in FXN and does not present any functional or molecular phenotype. Nonetheless, the optimization of the 5' UTR and Kozak sequences still resulted in a 48-fold increase of the average hFXN protein levels in the liver (Figures 8C–8E). Furthermore, the optimized AAVRh.10-hFXN vector led to much higher hFXN protein expression in the heart than liver of the same *Mck* mice (Figures 5D and 8C).

To assess the consequences of hFXN overexpression on the outcome of FA cardiac gene therapy, the cardiac function and morphology of the same *Mck* mice was assessed by echocardiography (Table S1). Longitudinal echocardiography analyses were performed from 7 to 15 weeks of age (Figures 5I–5L and S4). By 12 weeks of age, *Mck* mice treated with either vector displayed full correction of the heart function and morphology. However, mice treated with the optimized AAVRh.10-hFXN vector started deteriorating afterward, while sustained full correction was achieved in mice treated with the non-optimized AAVRh.10-CAG-hFXN-HA vector. This deterioration was characterized by a decrease of the LV SF (Figure 5I) and CO/BW (Figure 5J) and an increase of the LV mass (Figure 5K) and LV-ESD (Figure 5L). The LV-EDD was also increased but in a delayed manner compared to the other parameters measured (Figure S4A). Overall, this suggests a primary impairment of the contractile and systolic function of the LV, in line with our previous observation in WT mice treated with the non-optimized AAVRh.10-CAG-hFXN-HA (Figures 2I and 2J; Video S1). The impairment of the cardiac function in *Mck* mice treated with the optimized vector is supported by the increased gene expression of *Nppa* and *Nppb*, indicative of pressure/volume overload (Figure 5M).

Histological analysis of the heart fibrosis and cell infiltration was also performed on heart tissue sections (Figures 6A and 6B). Following H&E stain, *Mck* mice treated with the optimized vector displayed substantial heart fibrosis, distributed throughout the LV and associated with numerous cell infiltrates (Figure 6A). *Mck* mice treated with the non-optimized vector displayed a few fibrotic patches. Importantly, heart tissue sections from WT mice treated with the optimized vector at  $2.5 \times 10^{13}$  (n = 2) or  $5 \times 10^{12}$  vg/kg (n = 1) looked similar to heart tissue section from NaCl-injected WT mice (Figure 6A). This suggests the lack of intrinsic toxicity of the optimized vector. To quantify the accumulation of extracellular matrix associated with fibrosis, adjacent heart tissue sections were stained with WGA (Figure 6B). *Mck* mice treated with the non-optimized vector displayed more labeling than WT mice treated with NaCl, but at a much lower level than *Mck* mice treated with the optimized vector (Figure 6C). Furthermore, these observations were in agreement with the increased gene expression of *Col1a1*, *Col3a1*, and *Tgf $\beta$* , which are indicative of ongoing fibrosis (Figure 6D), but also of *Il1b* and *Il6*, which are indicative of ongoing inflammatory response (Figure 6E). To further investigate the nature of these cell infiltrates, adjacent heart tissue sections were immunolabeled for cluster of differentiation 14

### Figure 6. FXN Cardiotoxic Overexpression Is Associated with Acute Heart Fibrosis and Inflammation

(A) Histological analysis of fibrosis and cell infiltrates following H&E staining of heart tissue sections. Analysis of *Mck* mice treated with the AAVRh.10-hFXN (n = 8) or the AAVRh.10-hFXN-HA vector (n = 6) and WT mice treated with the AAVRh.10-hFXN vector at  $2.5 \times 10^{13}$  (n = 2) or  $5 \times 10^{12}$  (n = 1) vg/kg. The VCN and [FXN] in ng/mg are reported for each animal. (B) WGA staining of the extracellular matrix on heart tissue sections. Analysis of *Mck* mice injected with AAVRh.10-hFXN (n = 3) or AAVRh.10-CAG-hFXN-HA (n = 6) at  $2.5 \times 10^{13}$  vg/kg, WT mice injected with NaCl (n = 11) and untreated 9-week-old *Mck* mice (n = 6). (C) Quantification of heart surface labeled with WGA. Brown-Forsythe and Welch ANOVA test, p values are reported with n.s. p > 0.05. (D and E) qRT-PCR analysis of the heart mRNA level normalized to 18S and reported as percentage of NaCl-WT level. Brown-Forsythe and Welch ANOVA test, p values are reported with n.s. p > 0.05. (D) *Col1a1*, *Col3a1*, and *Tgf $\beta$*  mRNA levels. (E) *Il1b*, *Il6*, and *Tnf $\alpha$* . (F) Representative observations at low and high magnification of heart tissue sections immunolabeled for the monocyte cell marker CD14 (same exposure time). Analysis of 15-week-old NaCl-injected mice (n = 3) and *Mck* mice treated with AAVRh.10-hFXN (n = 3) or AAVRh.10-CAG-hFXN-HA (n = 3) at  $2.5 \times 10^{13}$  vg/kg. See also Figure S5 for supplementary histological analysis of CD14, CD45, and CD3.

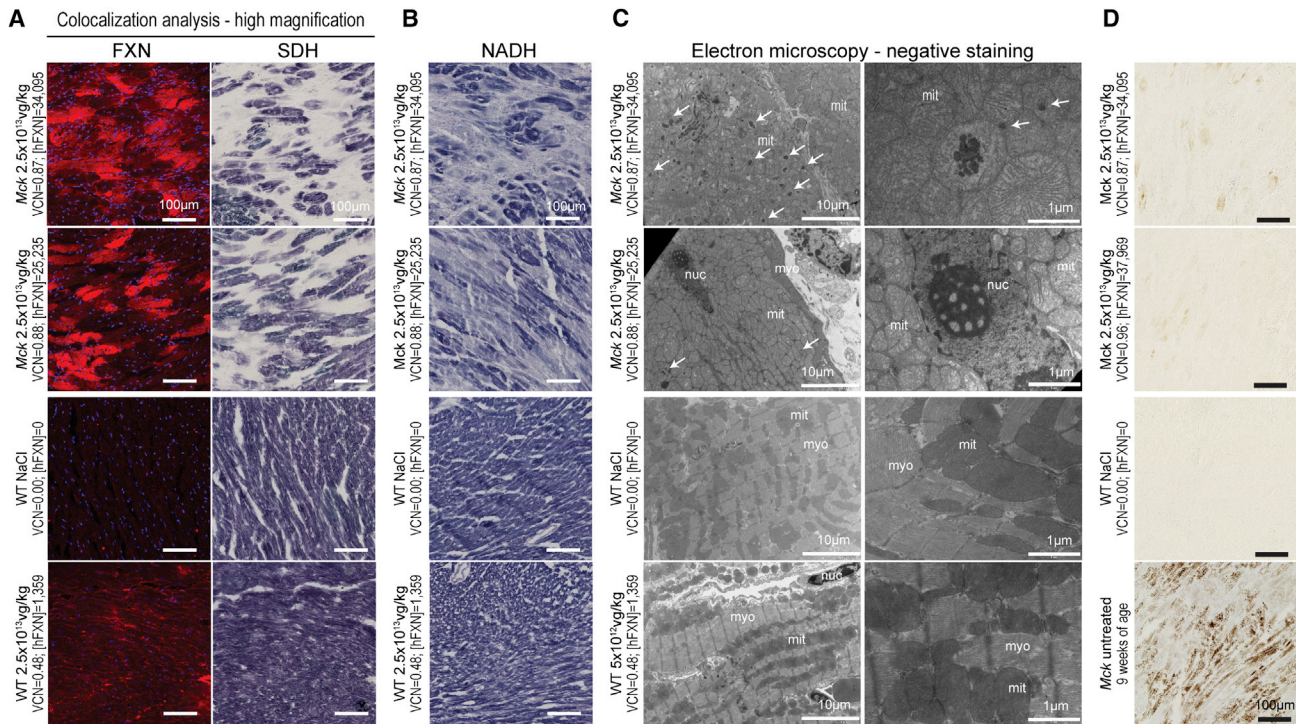

**Figure 7. FXN Cardiotoxic Overexpression Is Associated with Impaired Mitochondrial Function and Ultrastructure, but Not with Iron Overload**

Representative histological observations from the analysis of adjacent heart tissue sections/sample collected from mice treated at 7 weeks of age with the AAVrh.10-hFXN vector and sacrificed at 15 weeks of age. Analysis of *Mck* mice treated at  $2.5 \times 10^{13}$  vg/kg ( $n = 3$ ), WT mice treated at  $2.5 \times 10^{13}$  ( $n = 2$ ) or  $5 \times 10^{12}$  vg/kg ( $n = 1$ ), NaCl-injected WT mice ( $n = 2$ ) and untreated 9-week-old *Mck* mice ( $n = 2$ ). See also Figure S6 for low-magnification imaging. (A) Co-staining and co-localization analysis of hFXN-HA protein expression and SDH enzymatic activity, respectively, labeled by immunofluorescence and *in situ* histoenzymatic assay. (B) NADH enzymatic activities assessed by *in situ* histoenzymatic assay. (C) TEM observations at low and high magnification of the LV myocardium, following negative stain. White arrows indicate non-iron mitochondrial electron-dense bodies; myo, myofibrils; mito, mitochondria; nuc, nucleus. (D) DAB-enhanced Perls labeling of iron deposits.

(CD14), a maker of monocytes and macrophages (Figures 6F and S5A); CD45, a general marker of leukocytes including lymphocytes T, B, and monocytes (Figure S5B); and CD3, a general marker of lymphocytes including regulatory T cells and cytotoxic/natural killer (NK) T cells (Figure S5C). Spleen tissue sections were used as positive labeling controls for all these markers (Figures S5A–S5C). In line with the inflammatory and fibrotic response measured, *Mck* mice treated with the optimized vector showed extensive infiltrations of CD14+ and CD45+ cells, while mice treated with non-optimized vector showed much lower CD14+ and CD45+ labeling. Importantly, WT mice treated with the optimized vector did not show any cell infiltrates, supporting further the lack of intrinsic immunogenicity of the vector or its formulation (Figures S5A–S5C). In contrast, we were unable to identify CD3+ cell infiltrates in the heart tissue sections from animals treated with either vector, which would be expected in case of cytotoxic immune response (NK cells), as shown previously.<sup>35,36</sup>

The investigation of the mitochondria function in *Mck* mice treated with the optimized vector at  $2.5 \times 10^{13}$  vg/kg (Figures 7A, 7B, and S6A) revealed similar alterations as reported above in the *Mck* and WT mice treated with the non-optimized vector at higher doses (Fig-

ures 1A and 3). However, the severity and extent were much higher in mice treated with the optimized vector, in line with the much higher hFXN overexpression across the heart. In *Mck* mice treated with the optimized vector at  $2.5 \times 10^{13}$  vg/kg, co-labeling and co-localization analysis revealed numerous cardiomyocytes throughout the heart, with very high levels of FXN expression and impaired SDH enzymatic activity (Figure 7A). These hotspots of expression covered most of the heart surface (Figure S6A). In contrast, *Mck* mice treated with the non-optimized vector were rescued for SDH enzymatic activity throughout the heart, except for a few fibrotic patches (Figure S6B). Interestingly, the protein level of SDH subunit b (SDHb) was significantly decreased in the heart of the *Mck* mice treated with the optimized vector, when compared with *Mck* mice treated with the non-optimized vector (Figures 5E and 5G). Moreover, *Mck* mice treated with the optimized vector also showed impaired NADH enzymatic activity throughout the heart (Figures 7B and S6A), in line with previous observations in WT mice treated with the non-optimized vector at  $5 \times 10^{14}$  vg/kg (Figures 3 and S3). In contrast, the WT mouse treated with the optimized vector at  $2.5 \times 10^{13}$  vg/kg and expressing 9.2-fold the endogenous FXN level displayed normal SDH and NADH enzymatic activity (Figures 7A, 7B, and S6A). The second WT mouse treated similarly but overexpressing 38.7-fold the

endogenous level of FXN displayed few and sparse cardiomyocytes, with reduced SDH and NADH enzymatic activity.

To assess the cardiomyocytes and mitochondria ultrastructure following the administration of the optimized vector, samples from the LV myocardium of these same *Mck* ( $n = 3$ ) and WT ( $n = 1$ ) mice were collected and observed under TEM after negative staining (Figure 7C). *Mck* mice treated at  $2.5 \times 10^{13}$  vg/kg displayed severe alterations of cardiomyocyte subcellular organization, with scattered and disordered myofibrils and accumulation of swollen mitochondria, with very few visible cristae (Figure 7C). We also observed electron-dense bodies, inside the matrix of several mitochondria. These did not resemble collapsed cristae or iron deposits but appeared similar to what we observed in WT mice treated with the non-optimized vector at  $5 \times 10^{14}$  vg/kg (Figure 3). The absence of iron accumulation in the heart of these *Mck* mice was confirmed with DAB-Perls staining (Figure 7D).

Finally, we also analyzed the liver of the same *Mck* mice treated with the optimized vector at  $2.5 \times 10^{13}$  vg/kg to assess possible toxic effects beyond the heart. The level of hFXN protein in the liver ranged from 1,419 to 4,890 ng/mg when quantified by ELISA assay (Figure 8C). When measured in a distinct cohort of 9-week-old WT C57/B6J mice, the normal level of mouse FXN protein in the liver is  $49.6 \pm 7.8$  ng/mg ( $n = 5$ ). Thus, *Mck* mice treated with the optimized vector at  $2.5 \times 10^{13}$  vg/kg express up to 97-fold the endogenous level in the liver. The high expression was confirmed by western blot analysis (Figures 8D and 8E). Despite this high level of overexpression ([hFXN] =  $2,565 \pm 1,123$  ng/mg;  $n = 8$ ) and the high VCN ( $31 \pm 10$ ;  $n = 8$ ) measured (Figures 8A–8C), the liver histology of the three mice evaluated appeared all normal following H&E staining, with no obvious sign of fibrosis or cell infiltrations (Figure 8G). The latter would have been expected if an adaptive immune response was raised against the transgene and driving the cardiotoxicity. Moreover, TEM observation of adjacent liver samples collected from the same mice ( $n = 3$ ) did not reveal any obvious alterations of hepatocyte subcellular organization or alterations of mitochondria ultrastructure and/or biomass (Figure 8G). These results support further the lack of intrinsic toxicity of the AAVRh.10-hFXN vector or its formulation, when administered in *Mck* or WT mice (Figure 8G). The lack of similar mitochondrial toxicity in the liver was also supported by quantification of SDHb protein level (Figure 8F), which was similar to *Mck* mice treated with the non-optimized vector and expressing much lower levels of FXN ([hFXN] =  $53 \pm 14$  ng/mg;  $n = 3$ ). Altogether, these results support the lack of acute liver toxicity, despite very high levels of FXN overexpression, which contrast with the observed cardiotoxicity in the same mice.

## DISCUSSION

Here, we showed unequivocally the cardiotoxicity of FXN overexpression when expressed >20-fold the endogenous level and its safety when expressed <9-fold. This was demonstrated in three independent studies, using two different animal models and two different

AAVRh.10 vector constructs. The severity of this cardiotoxicity appeared to be proportional to the level of hFXN overexpression but also to the proportion and extent of cardiomyocytes affected throughout the heart. This led to more- or less-severe impairment of LV function and morphology, which then evolved either toward compensated heart hypertrophy or severe impairment of heart function. As demonstrated here, this cardiotoxicity might also compromise the therapeutic outcome of cardiac gene therapy for FA. The identification of this toxic threshold will help define more precisely the safe and efficient range of FXN expression for sustained correction of the FA cardiac phenotype. Our results also suggest that this toxicity might not be generalizable to all organs and/or cell types, as the mouse liver appeared to be tolerant to hFXN overexpression up to 90-fold the normal level.

The [hFXN] values and fold-overexpression numbers reported here correspond to average values reflecting unequal expression of FXN among the cardiomyocytes, some with relatively low or moderate levels and hotspots with very high levels. As shown previously,<sup>37</sup> the inhomogeneous distribution of the FXN expression in the heart reflects most likely the inhomogeneous diffusion of the AAV vectors throughout the cardiac vasculature and then into the parenchyma. This is most likely an inherent characteristic of AAV and intravenous administration. Nonetheless, the safe level of hFXN overexpression in the heart ( $\leq 9$ -fold the endogenous level) is in line with previous studies conducted in yeast, mammalian cell lines, transgenic *Drosophila*, and mouse models constitutively overexpressing FXN. Collectively, these studies reported toxicity when FXN overexpression was higher than 6- to 10-fold the endogenous level<sup>18–21,38,39</sup> but good tolerance for lower levels.<sup>16,17,40–43</sup> Importantly, the current study did not investigate if the expression of the hFXN in the mouse organism would overestimate or underestimate the toxic threshold to be identified if a similar study were to be conducted with the overexpression of the mouse FXN protein. Indeed, the precursor and mature form of the mouse and hFXN present, respectively, 70% and 91% identity. Previous studies have shown that the human ortholog can complement the knockout of the mouse *Fxn* gene, through the genomic insertion and the constitutive expression of the h*Fxn* gene locus in transgenic mouse models.<sup>16,44</sup> These transgenic mice have a normal phenotype and lifespan, therefore suggesting that the hFXN protein has the same functionalities as its mouse ortholog. However, it remained to be shown whether the human and mouse FXN protein have the same affinity and kinetics of activation on the mouse Fe-S cluster assembly complex. It is also unclear if a large excess of FXN could stifle and impair the Fe-S cluster assembly complex and how potential difference in affinity would be impactful. As non-human primates (NHP) have closer physiology to humans and express FXN ortholog with higher identity, we expect toxicology studies conducted in NHP to be more predictive of future clinical trials in FA patients. Indeed, the FXN precursor proteins in cynomolgus and rhesus monkeys are 91% and 92% identical to the hFXN, respectively.

Our results do not support the hypothesis of a potential intrinsic toxicity of the vector construct or production lot used in these mouse

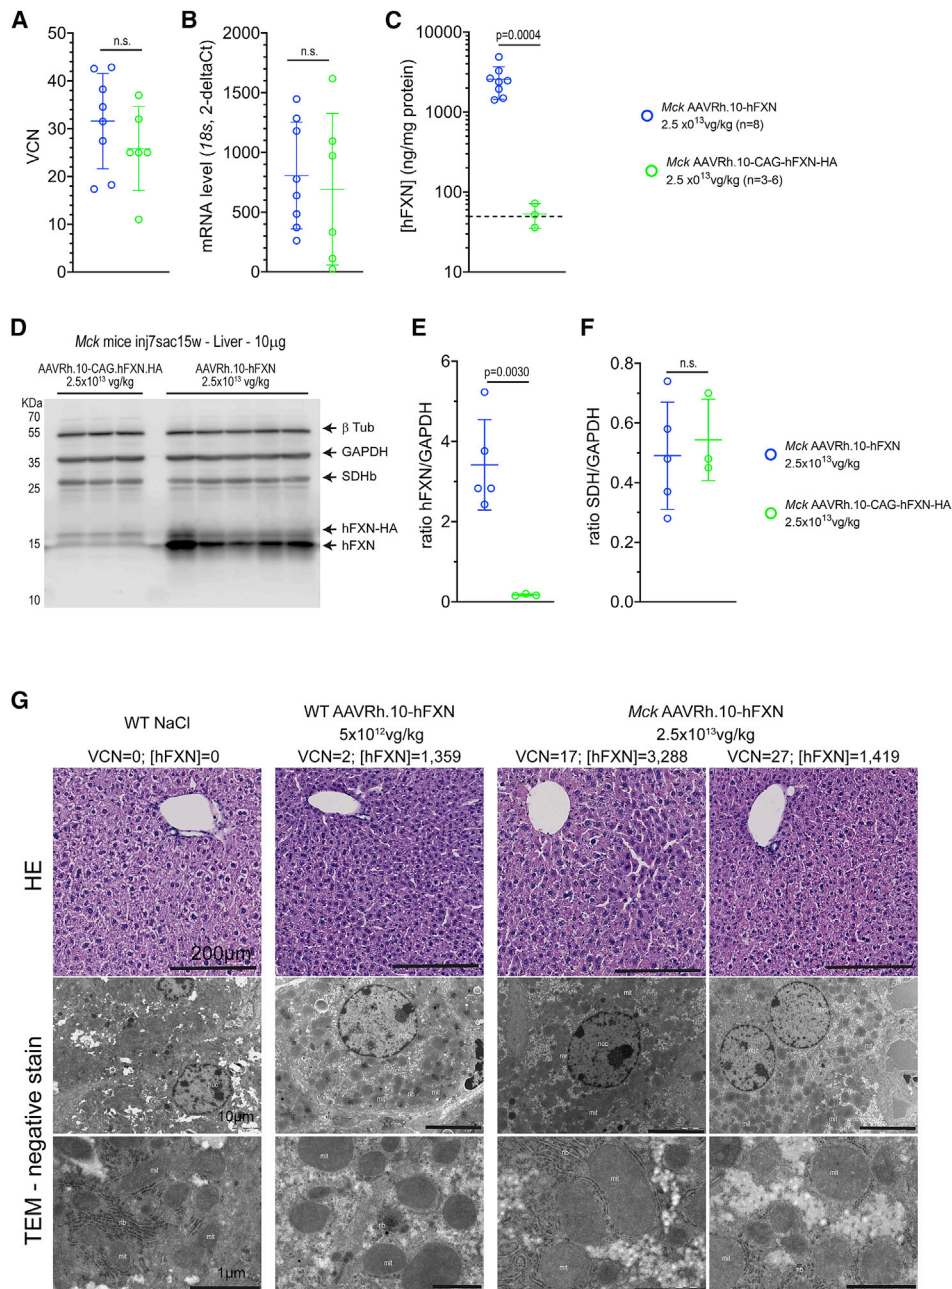

**Figure 8. Liver Overexpression up to 87-Fold the Normal Level Does Not Result in Similar Cellular and Mitochondria Acute Toxicity**

(A–C) The vector biodistribution and expression were assessed in the liver of *Mck* mice treated at 7 weeks of age with AAVRh.10-CAG-hFXN-HA (n = 6) or AAVRh.10-hFXN (n = 8) at  $2.5 \times 10^{13}$  vg/kg and sacrificed at 15 weeks of age. Individual data points are reported, with mean and SD. Welch's t test, p values are reported with n.s.  $p > 0.05$ . (A) qPCR analysis of VCN. (B) qRT-PCR quantification of the transgene mRNA level normalized to mouse FXN mRNA level. (C) ELISA quantification of FXN reported as ng per mg of total liver protein. Black dotted line represents the normal level of mouse FXN in WT mouse liver (i.e.,  $49.6 \pm 7.8$  ng/mg) (n = 5). (D–F) WB analysis of total liver protein extract from *Mck* mice treated with the non-optimized (n = 3) and optimized (n = 5) AAVRh.10 vector. (D) Immunoblotting against FXN, SDHb, GAPDH, and beta-Tubulin ( $\beta$ -Tub). (E) Relative FXN protein level normalized to GAPDH. (F) Relative SDHb protein level normalized to GAPDH. Individual data points are reported, with mean and SD. Welch's t test, p values are reported. (G) Representative histological observations of liver tissue section and ultrathin sections from *Mck* mice treated at 7 weeks of age with AAVRh.10-hFXN (n = 2–3) at  $2.5 \times 10^{13}$  vg/kg, WT treated with NaCl (n = 2) or with optimized AAVRh.10-hFXN at  $5 \times 10^{12}$  vg/kg (n = 1) and sacrificed at 15 weeks of age. The corresponding dose, VCN, and [hFXN] are reported next to each image series. Upper row, H&E staining. Lower row, TEM observations following negative stain.

studies, as WT mice injected with the same vectors did not show signs of toxicity, unless the hFXN protein level was beyond the toxic threshold. Several studies have shown cytotoxicity or genotoxicity following the administration of high-dose vector, particularly in large animal models.<sup>45,46</sup> Here, we have partially ruled out this possibility, as a much lower dose of the optimized AAVRh.10-hFXN vector also induced high levels of FXN expression and cardiotoxicity. In addition, previous mouse studies have shown that similar doses of vector, but with different DNA cargo, were well tolerated up to  $5 \times 10^{14}$  vg/kg, without noticeable cardiotoxicity at long term.<sup>47–51</sup> In the current study, we did not investigate the potential involvement of the innate or adaptive immune response against the vector, transgene, and/or transduced cells.<sup>35,36,52,53</sup> It is likely that the treated mice developed a humoral response against the capsid, including neutralizing antibodies, as shown previously in many mouse gene therapy studies.<sup>50,51</sup> However, the emergence of antibody against the capsid has not been shown to preclude the long-term expression of transgene or to drive cardiac inflammation but only the re-administration of the same vector.<sup>54</sup> Here, we did not explore the potential presence of antibodies against the transgene and, more importantly, the development of a potential cytotoxic cell response targeting the transduced cardiomyocytes. The cytotoxic immune response was shown previously to result in loss of transgene expression in animal models and patients.<sup>35,36,52,53</sup> In the present study, the AAVRh.10 vectors were delivered intravenously, leading to broad biodistribution and strong expression in many organs and muscles.<sup>12,55</sup> Therefore, we would expect a potential cytotoxic immune response to lead to cell infiltration, not only in the heart but also in all transduced organs, especially the liver, for which the AAVRh.10 capsid has the highest tropism. We will investigate these questions in future studies, as they are critical for future clinical development.

Cardiotoxic hFXN overexpression appeared to be driven by cell autonomous impairment of the mitochondria function and structure, most likely followed by cardiomyocyte cell death, heart fibrosis, and LV contractile dysfunction. Strikingly, the mitochondria toxicity affected NADH and SDH enzymatic activities but not COX. The severe ultrastructure anomalies of the mitochondria most likely contributed to their functional impairment,<sup>24</sup> which altogether leads to higher mitochondria biomass. These features are reminiscent of the cardiac, mitochondrial, and biochemical phenotype observed in untreated *Mck* mice and are hallmarks of FXN deficiency.<sup>10,12,15,56</sup> However, it is unclear if hFXN toxic overexpression was associated with or caused by (partial) impairment of Fe-S biogenesis or handling. Indeed, these two cardiac phenotypes differ from one another by the accumulation of mitochondrial iron upon FXN deficiency,<sup>22</sup> which was consistently not observed upon hFXN overexpressing in the three mouse studies conducted here. Indeed, cellular iron metabolism and dysregulation are mediated by IRP1, which is a cytosolic Fe-S protein.<sup>22</sup> These results are in line with previous overexpression studies conducted in yeast,<sup>18</sup> human cells,<sup>19</sup> and *Drosophila*,<sup>20</sup> where only a modest increase in labile iron was observed. Future studies will be needed to address the underlying mechanism, through time course analysis of patho-

logical events, including exhaustive biochemical analysis of the Fe-S biosynthesis, handling, and Fe-S enzymes.

These findings would likely apply to all *in vivo* gene replacement strategies for hFXN, independently of the AAV serotype or other type of viral vector used. Besides gene replacement strategies, this would also be of concern for alternative approaches if presenting the same risk of acute hFXN tissue concentration, either due to their mechanism of action or their delivery modality. This would include synthetic mRNA,<sup>57</sup> FXN protein replacement,<sup>58,59</sup> and *in vivo* gene transfer of strong artificial transcription factors.<sup>60,61</sup> While the current study was focused on the heart, this mitochondrial toxicity is likely to affect other organs. The dorsal root ganglia, the spinal cord, the cerebellum, and the dentate nucleus are important targets to address the neurological symptoms and would be of particular interest for future studies. The spleen and kidney are major off-target sites for AAV vectors following intravenous delivery and should also be considered carefully. Importantly, the FXN level varies largely among these organs,<sup>3,10</sup> most likely along cell-type specific metabolism and abundance of mitochondria. In the present and previous studies,<sup>14,15</sup> we have shown that the normal mouse FXN level is 147 ng/mg in the heart, 49 ng/mg in the liver, 12–25 ng/mg in dorsal root ganglia, and 28 ng/mg in the cerebellum. Therefore, we can hypothesize a different therapeutic index for each one of these organs. To ensure the safety of future clinical trials, AAV vectors will need to be designed to manage appropriately their expression profile across these different tissues. This could be achieved with (1) synthetic weak promoter or the endogenous human frataxin promoter,<sup>62–64</sup> (2) vector de-targeting strategies,<sup>65,66</sup> and/or (3) the design of expression cassette responsive to negative cellular feedback loop. Leveraging our knowledge of the cellular response to toxic FXN overexpression might help achieve the self-regulation of the vector expression and avoid toxic overexpression. For example, the 3' UTR sequence could be engineered to be targeted by inhibitory endogenous microRNA, specifically induced by the ISR,<sup>67,68</sup> or other cellular stress response such as the oxidative stress response.<sup>69,70</sup> In addition, specific routes of drug delivery might also present risk of high local concentration, such as intracardiac injection<sup>71</sup> or local delivery in the central nervous system.<sup>72,73</sup> Due diligence in the design of appropriate pharmacokinetic and toxicity studies, in relevant large animal models, will be crucial for the development of safe clinical therapeutic protocols. Finally, the identification of biomarkers to monitor subclinical toxicity and manage such events would be very advantageous. In this regard, the current study has identified potential candidates, including FGF21, to be explored in future studies.

In summary, the overexpression of hFXN is safe when  $\leq 9$ -fold the normal endogenous level but cardiotoxic when greater than 20-fold. The pathological mechanism was partially elucidated and is most likely primed by the alteration of the mitochondria structure and function. Depending on the percentage of cardiomyocytes affected, this resulted in either subclinical or acute cardiotoxicity.

The toxic threshold and potential readout for toxicity identified here will support the design of robust and meaningful toxicity studies, for safer FA gene therapy clinical trials.

## MATERIALS AND METHODS

### Adeno-Associated Viral Vector Constructs and Production

The AAVRh.10-CAG-hFXN-HA and AAVRh.10-hFXN vectors are described in Figures 5A and 5B and encode, respectively, the human frataxin cDNA, including the mitochondrial targeting sequence, and fused or not in C-terminal to the HA tag. These vectors were produced by triple transfection method in HEK293 cells,<sup>74</sup> respectively, at the Vector Core at the University Hospital of Nantes (France) and the Belfer Gene Therapy Core facility at Weill Cornell Medical College. Their respective concentration was measured as  $8.7 \times 10^{13}$  and  $1.96 \times 10^{14}$  vg/mL, by qPCR. Their purity was checked with a combination of the following assay: potential protein contamination by SDS-PAGE and Coomassie Blue Staining, endotoxin contamination with EndosafePTS LAL (<0.5 EU/m), sterility by growth in liquid and agar-based test media (no contamination detected at 48 h), and qPCR quantification of residual DNA material from AAV Rep or Adenovirus plasmids.

### Animal Procedures

WT C57/B6J mice were supplied by Charles River Laboratory, France. *Mck* mice were generated in 100% C57BL/6J background, with a conditional deletion of *Fxn* gene in cardiac and skeletal muscle (*Mck-Cre-Fxn*<sup>L3/L</sup>) and genotyped, as described previously.<sup>10</sup> This results in the complete depletion of frataxin protein in these organs. Note that *Mck* mice develop a cardiac dysfunction at 5 weeks of age, progressively worsening into heart failure at 7 weeks of age, eventually causing their death around 10 weeks of age.<sup>10</sup> Housing animal facility was controlled for temperature and humidity, with a 12-h light/dark cycle and free access to water and a standard rodent chow (D03, SAFE, Villemoisson-sur-Orge, France). All animal procedures and experiments were approved by the local ethical committee for animal care and use (Com'Eth HP/2012/09/27 and 5344). They were performed in accordance with the Guide for the Care and Use of Laboratory Animals (National Institutes of Health). Five- and seven-week-old animals were anesthetized with isoflurane prior to the retro-orbital injection of vector, in 100  $\mu$ L bolus. Control littermate or WT mice were injected with equivalent volume of NaCl 0.9% solution. Survival and comorbidities were evaluated daily, and BW was evaluated weekly. Echocardiography was performed with the Sonos 5500 system (Hewlett Packard) with a 15 MHz linear transducer (15L6) or with the Vevo 2100 system (Fujifilm Visualsonics) with a 25–55 MHz transducer, as described previously.<sup>15</sup> Briefly, echocardiography was performed under isoflurane anesthesia (0.5%–1.5%) and 0.8 mL/min O<sub>2</sub>, to maintain the heart rhythm between 450 and 550 bpm. Historical data were used as reference for untreated *Mck* mouse survival, BW, and cardiac function

Following intraperitoneal injection of ketamine-xylazine and blood sampling, mice were perfused with cooled NaCl 0.9%, and the heart and liver were retrieved quickly.

Briefly, the apex of the heart was sampled in cryotubes and flash frozen in liquid nitrogen for subsequent DNA and RNA extraction and analysis, as described previously.<sup>15</sup> Two small pieces from the LV anterior wall (less than 1 mm<sup>3</sup>) were sampled in Karnovsky's fixative and processed for TEM morphological analysis. A thin transverse section (around 2 mm thick) was cut at the middle level of the heart for protein analysis. The middle to the base of the heart was embedded in OCT and frozen in isopentane chilled with liquid nitrogen for histological analysis.

The liver medial left lobe was sampled and fixed in PBS 1  $\times$  formaldehyde 10%, dehydrated, and then embedded in paraffin for histological analysis. Two small pieces from the left lateral lobe (less than 2 mm<sup>3</sup>) were sampled and fixed in Karnovsky's fixative for transmitted electron microscopy (TEM) analysis. The remaining lobes—lateral left, medial right, lateral right, and caudate lobes—were sampled in a cryotube and flash frozen in liquid nitrogen for subsequent DNA, RNA, and protein analysis.

The spleen was fixed in PBS 1  $\times$  formaldehyde 4%, embedded in OCT, and frozen in isopentane chilled with liquid nitrogen for histological analysis.

### Histochemistry

Frozen sections from the heart and the spleen, and liver paraffin sections, were collected on Superfrost glass slides. For each staining, the group and number of animals analyzed is reported in the respective figure legend (1–3 tissue sections stained per animal for each histological analysis). Heart and liver tissue sections were stained with H&E. In addition, heart tissue sections were stained with WGA conjugated with Alexa 488 nm, or stained with DAB-enhanced Perls labeling, or used to perform *in situ* histochemical activity assay for SDH or cytochrome C oxidase, as previously described.<sup>15</sup> NADH dehydrogenase *in situ* histochemical activity was performed on heart tissue sections accordingly to Luna et al.<sup>75</sup>

Immunofluorescent labeling, with or without SDH co-labeling, was performed as described previously,<sup>15</sup> with the following antibodies and dilutions: frataxin (anti-FXN, 1/50, IGBMC; FXN935 and anti-HA, 1/100, Abcam, Ab9110), prohibitin (1/300, Ab28172), Sqstm1 (1/300, 2C11, H00008878-M01, Millipore). The FXN antibodies recognize both the human and mouse FXN, including the precursor, intermediate, and mature forms.

For labeling of CD3-, CD14-, and CD45-positive cells, tissue sections were fixed in 4% paraformaldehyde (PFA) for 5 min, permeabilized in PBS 1  $\times$  0.3% Triton X-100 at room temperature (RT) for 10 min, and then blocked with PBS, 1% NGS, 5% BSA, 0.2% Tween (PBS-NBT) for 30 min at RT. Subsequently, tissue sections were incubated overnight (O/N) at 4°C with the rabbit antibody against CD3 (1/100, ab16669, Abcam) or CD14 (1/100, ab183322, Abcam,) or CD45 (1/100, ab10558, Abcam) and afterward with Alexa fluor 488 nm conjugated goat anti-rabbit antibody (1/300, Molecular Probes).

Imaging of the heart, liver, and spleen tissue sections were performed with the Hamamatsu NanoZoomer 2.0 slide scanner.

### Electron Microscopy Analysis

The samples were fixed with 2.5% glutaraldehyde and 2.5% PFA in cacodylate buffer (0.1 M [pH 7.4]), washed 30 min in cacodylate buffer, post-fixed with 1% osmium tetroxide in 0.1 M cacodylate buffer for 1 h at 4°C, and dehydrated through graded alcohol (50%, 70%, 90%, and 100%) and propylene oxide for 30 min each. Samples were oriented and embedded in Epon 812. Semithin sections were cut at 2 μm with the Leica Ultracut UCT ultramicrotome and stained with 1% toluidine blue and 1% sodium borate. Ultrathin sections were cut at 70 nm and contrasted with uranyl acetate and lead citrate. Electron microscopy observation and image acquisition were performed at 70 kv with the Morgagni 268D electron microscope (FEI Electron Optics, Eindhoven, the Netherlands) and equipped with the Mega View III camera (Soft Imaging System). The bismuth sodium tartrate staining of ferritin was performed as described previously.<sup>27,76</sup>

### DNA, RNA, and Protein Analysis

DNA, RNA, and protein extraction and quantification, as well as cDNA synthesis, were performed as described previously.<sup>15</sup>

Briefly, absolute quantification of vector biodistribution was performed in triplicate and the qRT-PCR in duplicate, using the Quantitect Sybr Green CR kit (QIAGEN, 1037795) and the Light Cycler 480 II (Roche Biosciences). Primers were used at 0.4 μM final concentration, and their sequences are reported in Table S5. qPCR amplification program: 1 cycle, 15 min 95°C; 50 cycles, 15 s 94°C–30 s 60°C–30 s 72°C; 1 cycle for melting curve. Depending on the expression level of the target genes quantified, cDNA dilutions ranging from 1/50 to 1/2,000 were performed. As working Ct (threshold cycle) values ranged between 12 and 34 cycles, *18S* and *Hprt* were used for normalization, respectively, when the target genes required high and low cDNA dilution for the qPCR assay.

SimpleStep Human Frataxin ELISA Kit (Abcam, ab176112) and SimpleStep Mouse Frataxin ELISA kit (Abcam, ab199078) were used to quantify the heart and liver tissue concentration in human and mouse frataxin, respectively, following manufacturer instructions.

For western blot analysis, between 10 and 30 μg of total protein extract were loaded and migrated in 14% or 4%–12% SDS-PAGE gels (Novex, Nupage 4%–12% Bis-Tris Midi Gels, 26 wells). Following transfer onto nitrocellulose membranes (Amersham Protran 0.45 μm NC), Red Ponceau staining (Sigma Aldrich, P7170-1L), and blocking, the membranes were immunoblotted O/N at 4°C with the following antibodies and dilution: mouse anti-frataxin (1/10,000, 4F9, IGBMC), mouse anti-complex II 30 kDa subunit SDHb (1/10,000, 21A11AE7, Novex), mouse anti-glyceraldehyde-3-phosphate dehydrogenase (1/30,000, MAB374, Millipore), and/or mouse anti-beta-tubulin (1/10,000, IGBMC). After incubation for 2 h at 4°C with goat anti-mouse IgG H<sup>+</sup>L (1/10,000, 115-035-146, Jackson Immunoresearch), the

signal was revealed using the SuperSignal West Dura Extended Duration Substrate (ThermoScientific, 34075) and imaged with the Amersham Imager 600 (GE Healthcare).

### Statistical, Correlation, and Regression Analysis

Unless otherwise specified, data are reported as mean ± standard deviation (SD). Statistical analyses were carried out using GraphPad Prism 8.3 (GraphPad Software, La Jolla CA, USA), and methods are described in the figure legends.

### SUPPLEMENTAL INFORMATION

Supplemental Information can be found online at <https://doi.org/10.1016/j.omtm.2020.08.018>.

### AUTHOR CONTRIBUTIONS

B.B. and H.P. conceived the project. B.B. conducted and analyzed the experiments. L.R. managed mouse production. N.M. performed electron microscopy. L.M. provided logical support for echocardiography. B.B. and H.P. wrote the manuscript.

### CONFLICTS OF INTEREST

H.P. is the owner of patents pertaining to cardiac and neurological gene therapy methods for the treatment of FA (WO2016150964A1, EP2950824A1, US20150313969A1, US9066966B2, and CA2900135A1) and is one of the scientific co-founders of AAVlife SAS. H.P. is an advisor and beneficiary of sponsored research agreement from Adverum Biotechnologies and Voyager Therapeutics. B.B. is currently employed by Adverum Biotechnologies, although the work was done previous to employment. H.P. and B.B. own equities in Adverum Biotechnologies. All other authors declare no competing financial interests.

### ACKNOWLEDGMENTS

We thank Dr. Hugues Jacob, Karim Hnia, Nicolas Charlet-Berguerand, and Pr. Jean-Louis Mandel for scientific discussions and Dr. Wyatt Delphino and Mehdi Gasmi for critical review of the manuscript. We thank Dr. Ronald G. Crystal (Department of Genetic Medicine, Weill Cornell Medicine, NY, USA) for the production of the optimized construct and vector and Dr. Mustapha Oulad-Abdelghani for providing the 4F9 mouse monoclonal antibodies against FXN. We thank Dr. Tania Sorg, Ghina Bou-About, Josiane Hergueux, the mouse clinic institute phenotyping platform, and Dr. Luc Dupuis for logistical and technical assistance. This work was supported by the Lefoulond Delalande Foundation–Institut de France (post-doctoral research fellowships, 2016); the Friedreich Ataxia Research Alliance (Keith Michael Andrus Cardiac Research Award, 2016); the French Muscular Dystrophy Association AFM-Téléthon (research grant year 2014); and AAVLIFE SAS (sponsored research agreement years 2014–2016). This study was also supported by the grant ANR-10-LABX-0030-INRT, a French State fund managed by the Agence Nationale de la Recherche under the frame program Investissement d'Avenir ANR-10-IDEX-0002-02.



## REFERENCES

- Bürk, K. (2017). Friedreich Ataxia: current status and future prospects. *Cerebellum Ataxias* 4, 4.
- Tsou, A.Y., Paulsen, E.K., Lagedrost, S.J., Perlman, S.L., Mathews, K.D., Wilmot, G.R., Ravina, B., Koeppen, A.H., and Lynch, D.R. (2011). Mortality in Friedreich ataxia. *J. Neurol. Sci.* 307, 46–49.
- Campuzano, V., Montermini, L., Moltó, M.D., Pianese, L., Cossée, M., Cavalcanti, F., Monros, E., Rodius, F., Duclos, F., Monticelli, A., et al. (1996). Friedreich's ataxia: autosomal recessive disease caused by an intronic GAA triplet repeat expansion. *Science* 271, 1423–1427.
- Saveliev, A., Everett, C., Sharpe, T., Webster, Z., and Festenstein, R. (2003). DNA triplet repeats mediate heterochromatin-protein-1-sensitive variegated gene silencing. *Nature* 422, 909–913.
- Maio, N., Jain, A., and Rouault, T.A. (2020). Mammalian iron-sulfur cluster biogenesis: Recent insights into the roles of frataxin, acyl carrier protein and ATPase-mediated transfer to recipient proteins. *Curr. Opin. Chem. Biol.* 55, 34–44.
- Sheftel, A., Stehling, O., and Lill, R. (2010). Iron-sulfur proteins in health and disease. *Trends Endocrinol. Metab.* 21, 302–314.
- Mayr, J.A., Feichtinger, R.G., Tort, F., Ribes, A., and Sperl, W. (2014). Lipoic acid biosynthesis defects. *J. Inher. Metab. Dis.* 37, 553–563.
- Leimkühler, S. (2017). Shared function and moonlighting proteins in molybdenum cofactor biosynthesis. *Biol. Chem.* 398, 1009–1026.
- Braymer, J.J., and Lill, R. (2017). Iron-sulfur cluster biogenesis and trafficking in mitochondria. *J. Biol. Chem.* 292, 12754–12763.
- Puccio, H., Simon, D., Cossée, M., Criqui-Filipe, P., Tiziano, F., Melki, J., Hindelang, C., Matyas, R., Rustin, P., and Koenig, M. (2001). Mouse models for Friedreich ataxia exhibit cardiomyopathy, sensory nerve defect and Fe-S enzyme deficiency followed by intramitochondrial iron deposits. *Nat. Genet.* 27, 181–186.
- Chandran, V., Gao, K., Swarup, V., Versano, R., Dong, H., Jordan, M.C., and Geschwind, D.H. (2017). Inducible and reversible phenotypes in a novel mouse model of Friedreich's Ataxia. *eLife* 6, e30054.
- Perdomini, M., Belbellaa, B., Monassier, L., Reutenauer, L., Messaddeq, N., Cartier, N., Crystal, R.G., Aubourg, P., and Puccio, H. (2014). Prevention and reversal of severe mitochondrial cardiomyopathy by gene therapy in a mouse model of Friedreich's ataxia. *Nat. Med.* 20, 542–547.
- Gérard, C., Xiao, X., Filali, M., Coulombe, Z., Arsenaault, M., Couet, J., Li, J., Drolet, M.C., Chapdelaine, P., Chikh, A., and Tremblay, J.P. (2014). An AAV9 coding for frataxin clearly improved the symptoms and prolonged the life of Friedreich ataxia mouse models. *Mol. Ther. Methods Clin. Dev.* 1, 14044.
- Piguet, F., de Montigny, C., Vaucamps, N., Reutenauer, L., Eisenmann, A., and Puccio, H. (2018). Rapid and Complete Reversal of Sensory Ataxia by Gene Therapy in a Novel Model of Friedreich Ataxia. *Mol. Ther.* 26, 1940–1952.
- Belbellaa, B., Reutenauer, L., Monassier, L., and Puccio, H. (2019). Correction of half the cardiomyocytes fully rescue Friedreich ataxia mitochondrial cardiomyopathy through cell-autonomous mechanisms. *Hum. Mol. Genet.* 28, 1274–1285.
- Pook, M.A., Al-Mahdawi, S., Carroll, C.J., Cossée, M., Puccio, H., Lawrence, L., Clark, P., Lowrie, M.B., Bradley, J.L., Cooper, J.M., et al. (2001). Rescue of the Friedreich's ataxia knockout mouse by human YAC transgenesis. *Neurogenetics* 3, 185–193.
- Miranda, C.J., Santos, M.M., Ohshima, K., Tessaro, M., Sequeiros, J., and Pandolfó, M. (2004). Frataxin overexpressing mice. *FEBS Lett.* 572, 281–288.
- Wang, Y., Wang, Y., Marcus, S., and Busenlehner, L.S. (2014). The role of frataxin in fission yeast iron metabolism: implications for Friedreich's ataxia. *Biochim. Biophys. Acta* 1840, 3022–3033.
- Vannucci, T., Notario Manzano, R., Beccalli, O., Bettgazzi, B., Grohovaz, F., Cinque, G., de Riso, A., Quaroni, L., Codazzi, F., and Pastore, A. (2018). Adding a temporal dimension to the study of Friedreich's ataxia: the effect of frataxin overexpression in a human cell model. *Dis. Model. Mech.* 11, dmm032706.
- Edenharter, O., Clement, J., Schneuwly, S., and Navarro, J.A. (2017). Overexpression of *Drosophila* frataxin triggers cell death in an iron-dependent manner. *J. Neurogenet.* 31, 189–202.
- Navarro, J.A., Llorens, J.V., Soriano, S., Botella, J.A., Schneuwly, S., Martínez-Sebastián, M.J., and Moltó, M.D. (2011). Overexpression of human and fly frataxins in *Drosophila* provokes deleterious effects at biochemical, physiological and developmental levels. *PLoS ONE* 6, e21017.
- Richardson, D.R., Huang, M.L., Whitnall, M., Becker, E.M., Ponka, P., and Suryo Rahmanto, Y. (2010). The ins and outs of mitochondrial iron-loading: the metabolic defect in Friedreich's ataxia. *J. Mol. Med. (Berl.)* 88, 323–329.
- Rich, P.R., and Maréchal, A. (2010). The mitochondrial respiratory chain. *Essays Biochem.* 47, 1–23.
- Dudkina, N.V., Kouril, R., Peters, K., Braun, H.P., and Boekema, E.J. (2010). Structure and function of mitochondrial supercomplexes. *Biochim. Biophys. Acta* 1797, 664–670.
- Koeppen, A.H., Ramirez, R.L., Becker, A.B., Bjork, S.T., Levi, S., Santambrogio, P., Parsons, P.J., Kruger, P.C., Yang, K.X., Feustel, P.J., and Mazurkiewicz, J.E. (2015). The pathogenesis of cardiomyopathy in Friedreich ataxia. *PLoS ONE* 10, e0116396.
- Ward, P.G.D., Harding, I.H., Close, T.G., Corben, L.A., Delatycky, M.B., Storey, E., Georgiou-Karistianis, N., and Egan, G.F. (2019). Longitudinal evaluation of iron concentration and atrophy in the dentate nuclei in friedreich ataxia. *Mov. Disord.* 34, 335–343.
- Michael, S., Petrocine, S.V., Qian, J., Lamarche, J.B., Knutson, M.D., Garrick, M.D., and Koeppen, A.H. (2006). Iron and iron-responsive proteins in the cardiomyopathy of Friedreich's ataxia. *Cerebellum* 5, 257–267.
- Koeppen, A.H. (2011). Friedreich's ataxia: pathology, pathogenesis, and molecular genetics. *J. Neurol. Sci.* 303, 1–12.
- Arosio, P., Elia, L., and Poli, M. (2017). Ferritin, cellular iron storage and regulation. *IUBMB Life* 69, 414–422.
- Tatsuta, T., Model, K., and Langer, T. (2005). Formation of membrane-bound ring complexes by prohibitins in mitochondria. *Mol. Biol. Cell* 16, 248–259.
- Planavila, A., Redondo-Angulo, I., and Villarroya, F. (2015). FGF21 and Cardiac Physiopathology. *Front. Endocrinol. (Lausanne)* 6, 133.
- Montero, R., Yubero, D., Villarroya, J., Henares, D., Jou, C., Rodríguez, M.A., Ramos, F., Nascimento, A., Ortez, C.L., Campistol, J., et al. (2016). GDF-15 Is Elevated in Children with Mitochondrial Diseases and Is Induced by Mitochondrial Dysfunction. *PLoS ONE* 11, e0148709.
- Schmucker, S., Argenti, M., Carelle-Calmels, N., Martelli, A., and Puccio, H. (2008). The in vivo mitochondrial two-step maturation of human frataxin. *Hum. Mol. Genet.* 17, 3521–3531.
- Huang, M.L., Sivagurunathan, S., Ting, S., Jansson, P.J., Austin, C.J., Kelly, M., Semsarian, C., Zhang, D., and Richardson, D.R. (2013). Molecular and functional alterations in a mouse cardiac model of Friedreich ataxia: activation of the integrated stress response, eIF2 $\alpha$  phosphorylation, and the induction of downstream targets. *Am. J. Pathol.* 183, 745–757.
- Manno, C.S., Pierce, G.F., Arruda, V.R., Glader, B., Ragni, M., Rasko, J.J., Ozelo, M.C., Hoots, K., Blatt, P., Konkle, B., et al. (2006). Successful transduction of liver in hemophilia by AAV-Factor IX and limitations imposed by the host immune response. *Nat. Med.* 12, 342–347.
- Mingozzi, F., Maus, M.V., Hui, D.J., Sabatino, D.E., Murphy, S.L., Rasko, J.E., Ragni, M.V., Manno, C.S., Sommer, J., Jiang, H., et al. (2007). CD8(+) T-cell responses to adeno-associated virus capsid in humans. *Nat. Med.* 13, 419–422.
- Prasad, K.M., Xu, Y., Yang, Z., Acton, S.T., and French, B.A. (2011). Robust cardiomyocyte-specific gene expression following systemic injection of AAV: in vivo gene delivery follows a Poisson distribution. *Gene Ther.* 18, 43–52.
- Vannucci, T., Dinarelli, S., Girasole, M., Pastore, A., and Longo, G. (2019). A new tool to determine the cellular metabolic landscape: nanotechnology to the study of Friedreich's ataxia. *Sci. Rep.* 9, 19282.
- Llorens, J.V., Navarro, J.A., Martínez-Sebastián, M.J., Baylies, M.K., Schneuwly, S., Botella, J.A., and Moltó, M.D. (2007). Causative role of oxidative stress in a *Drosophila* model of Friedreich ataxia. *FASEB J.* 21, 333–344.
- Seguin, A., Bayot, A., Dancis, A., Rogowska-Wrzęsinska, A., Auchère, F., Camadro, J.M., Bulteau, A.L., and Lesuisse, E. (2009). Overexpression of the yeast frataxin

- homolog (Yfh1): contrasting effects on iron-sulfur cluster assembly, heme synthesis and resistance to oxidative stress. *Mitochondrion* 9, 130–138.
41. Ristow, M., Pfister, M.F., Yee, A.J., Schubert, M., Michael, L., Zhang, C.Y., Ueki, K., Michael, M.D., 2nd, Lowell, B.B., and Kahn, C.R. (2000). Frataxin activates mitochondrial energy conversion and oxidative phosphorylation. *Proc. Natl. Acad. Sci. USA* 97, 12239–12243.
  42. Shoichet, S.A., Bäumer, A.T., Stamenkovic, D., Sauer, H., Pfeiffer, A.F., Kahn, C.R., Müller-Wieland, D., Richter, C., and Ristow, M. (2002). Frataxin promotes antioxidant defense in a thiol-dependent manner resulting in diminished malignant transformation in vitro. *Hum. Mol. Genet.* 11, 815–821.
  43. Runko, A.P., Griswold, A.J., and Min, K.T. (2008). Overexpression of frataxin in the mitochondria increases resistance to oxidative stress and extends lifespan in *Drosophila*. *FEBS Lett.* 582, 715–719.
  44. Sarsero, J.P., Li, L., Holloway, T.P., Voullaire, L., Gazeas, S., Fowler, K.J., Kirby, D.M., Thorburn, D.R., Galle, A., Cheema, S., et al. (2004). Human BAC-mediated rescue of the Friedreich ataxia knockout mutation in transgenic mice. *Mamm. Genome* 15, 370–382.
  45. Hinderer, C., Katz, N., Buza, E.L., Dyer, C., Goode, T., Bell, P., Richman, L.K., and Wilson, J.M. (2018). Severe Toxicity in Nonhuman Primates and Piglets Following High-Dose Intravenous Administration of an Adeno-Associated Virus Vector Expressing Human SMN. *Hum. Gene Ther.* 29, 285–298.
  46. Nault, J.-C., Datta, S., Imbeaud, S., Franconi, A., Mallet, M., Couchy, G., Letouzé, E., Pilati, C., Verret, B., Blanc, J.F., et al. (2015). Recurrent AAV2-related insertional mutagenesis in human hepatocellular carcinomas. *Nat. Genet.* 47, 1187–1193.
  47. Foust, K.D., Wang, X., McGovern, V.L., Braun, L., Bevan, A.K., Haidet, A.M., Le, T.T., Morales, P.R., Rich, M.M., Burghes, A.H., and Kaspar, B.K. (2010). Rescue of the spinal muscular atrophy phenotype in a mouse model by early postnatal delivery of SMN. *Nat. Biotechnol.* 28, 271–274.
  48. Bočkor, L., Bortolussi, G., Iaconig, A., Chiaruttini, G., Tiribelli, C., Giacca, M., Benvenuti, F., Zentilin, L., and Muro, A.F. (2017). Repeated AAV-mediated gene transfer by serotype switching enables long-lasting therapeutic levels of hUgt1a1 enzyme in a mouse model of Crigler-Najjar Syndrome Type I. *Gene Ther.* 24, 649–660.
  49. Xu, R., Jia, Y., Zygmunt, D.A., and Martin, P.T. (2019). rAAVrh74.MCK.GALGT2 Protects against Loss of Hemodynamic Function in the Aging mdx Mouse Heart. *Mol. Ther.* 27, 636–649.
  50. Zygmunt, D.A., Xu, R., Jia, Y., Ashbrook, A., Menke, C., Shao, G., Yoon, J.H., Hamilton, S., Pisharath, H., Bolon, B., and Martin, P.T. (2019). rAAVrh74.MCK.GALGT2 Demonstrates Safety and Widespread Muscle Glycosylation after Intravenous Delivery in C57BL/6J Mice. *Mol. Ther. Methods Clin. Dev.* 15, 305–319.
  51. Manso, A.M., Hashem, S.I., Nelson, B.C., Gault, E., Soto-Hermida, A., Villarruel, E., Brambatti, M., Bogomolovas, J., Bushway, P.J., Chen, C., et al. (2020). Systemic AAV9.LAMP2B injection reverses metabolic and physiologic multiorgan dysfunction in a murine model of Danon disease. *Sci. Transl. Med.* 12, eaax1744.
  52. Zhu, J., Huang, X., and Yang, Y. (2009). The TLR9-MyD88 pathway is critical for adaptive immune responses to adeno-associated virus gene therapy vectors in mice. *J. Clin. Invest.* 119, 2388–2398.
  53. Ashley, S.N., Somanathan, S., Giles, A.R., and Wilson, J.M. (2019). TLR9 signaling mediates adaptive immunity following systemic AAV gene therapy. *Cell. Immunol.* 346, 103997.
  54. Leborgne, C., Barbon, E., Alexander, J.M., Hanby, H., Delignat, S., Cohen, D.M., Collaud, F., Muraleetharan, S., Lupu, D., Silverberg, J., et al. (2020). IgG-cleaving endopeptidase enables in vivo gene therapy in the presence of anti-AAV neutralizing antibodies. *Nat. Med.* 26, 1096–1101.
  55. Hu, C., Busuttill, R.W., and Lipshutz, G.S. (2010). RH10 provides superior transgene expression in mice when compared with natural AAV serotypes for neonatal gene therapy. *J. Gene Med.* 12, 766–778.
  56. Wagner, G.R., Pride, P.M., Babbey, C.M., and Payne, R.M. (2012). Friedreich's ataxia reveals a mechanism for coordinate regulation of oxidative metabolism via feedback inhibition of the SIRT3 deacetylase. *Hum. Mol. Genet.* 21, 2688–2697.
  57. Nabhan, J.F., Wood, K.M., Rao, V.P., Morin, J., Bhamidipaty, S., LaBranche, T.P., Gooch, R.L., Bozal, F., Bulawa, C.E., and Guild, B.C. (2016). Intrathecal delivery of frataxin mRNA encapsulated in lipid nanoparticles to dorsal root ganglia as a potential therapeutic for Friedreich's ataxia. *Sci. Rep.* 6, 20019.
  58. Vyas, P.M., Tomamichel, W.J., Pride, P.M., Babbey, C.M., Wang, Q., Mercier, J., Martin, E.M., and Payne, R.M. (2012). A TAT-frataxin fusion protein increases lifespan and cardiac function in a conditional Friedreich's ataxia mouse model. *Hum. Mol. Genet.* 21, 1230–1247.
  59. Britti, E., Delaspres, F., Feldman, A., Osborne, M., Greif, H., Tamarit, J., and Ros, J. (2018). Frataxin-deficient neurons and mice models of Friedreich ataxia are improved by TAT-MTScs-FXN treatment. *J. Cell. Mol. Med.* 22, 834–848.
  60. Chapdelaine, P., Gérard, C., Sanchez, N., Cherif, K., Rousseau, J., Ouellet, D.L., Jauvin, D., and Tremblay, J.P. (2016). Development of an AAV9 coding for a 3XFLAG-TALEfrat#8-VP64 able to increase in vivo the human frataxin in YG8R mice. *Gene Ther.* 23, 606–614.
  61. Cherif, K., Gérard, C., Rousseau, J., Ouellet, D.L., Chapdelaine, P., and Tremblay, J.P. (2018). Increased Frataxin Expression Induced in Friedreich Ataxia Cells by Platinum TALE-VP64s or Platinum TALE-SunTag. *Mol. Ther. Nucleic Acids* 12, 19–32.
  62. Puspasari, N., Rowley, S.M., Gordon, L., Lockhart, P.J., Ioannou, P.A., Delatycki, M.B., and Sarsero, J.P. (2011). Long range regulation of human FXN gene expression. *PLoS ONE* 6, e22001.
  63. Sarsero, J.P., Holloway, T.P., Li, L., Finkelstein, D.I., and Ioannou, P.A. (2014). Rescue of the Friedreich ataxia knockout mutation in transgenic mice containing an FXN-EGFP genomic reporter. *PLoS ONE* 9, e93307.
  64. Li, J., Li, Y., Wang, J., Gonzalez, T.J., Asokan, A., Napierala, J.S., and Napierala, M. (2020). Defining Transcription Regulatory Elements in the Human Frataxin Gene: Implications for Gene Therapy. *Hum. Gene Ther.* 31, 839–851.
  65. Wang, D., Li, S., Gessler, D.J., Xie, J., Zhong, L., Li, J., Tran, K., Van Vliet, K., Ren, L., Su, Q., et al. (2018). A Rationally Engineered Capsid Variant of AAV9 for Systemic CNS-Directed and Peripheral Tissue-Targeted Gene Delivery in Neonates. *Mol. Ther. Methods Clin. Dev.* 9, 234–246.
  66. Xie, J., Xie, Q., Zhang, H., Ameres, S.L., Hung, J.-H., Su, Q., He, R., Mu, X., Seher Ahmed, S., Park, S., et al. (2011). MicroRNA-regulated, systemically delivered rAAV9: a step closer to CNS-restricted transgene expression. *Mol. Ther.* 19, 526–535.
  67. Chitnis, N.S., Pytel, D., Bobrovnikova-Marjon, E., Pant, D., Zheng, H., Maas, N.L., Frederick, B., Kushner, J.A., Chodosh, L.A., Koumenis, C., et al. (2012). miR-211 is a prosurvival microRNA that regulates chop expression in a PERK-dependent manner. *Mol. Cell* 48, 353–364.
  68. Ye, H., Xie, M., Xue, S., Hamri, G.C.-E., Yin, J., Zulewski, H., and Fusseneggar, M. (2016). Self-adjusting synthetic gene circuit for correcting insulin resistance. *Nat. Biomed. Eng.* 1, 0005.
  69. Shah, N.M., Rushworth, S.A., Murray, M.Y., Bowles, K.M., and MacEwan, D.J. (2013). Understanding the role of NRF2-regulated miRNAs in human malignancies. *Oncotarget* 4, 1130–1142.
  70. Sun, W., Yi, Y., Xia, G., Zhao, Y., Yu, Y., Li, L., Hua, C., He, B., Yang, B., Yu, C., et al. (2019). Nrf2-miR-129-3p-mTOR Axis Controls an miRNA Regulatory Network Involved in HDACi-Induced Autophagy. *Mol. Ther.* 27, 1039–1050.
  71. Merentie, M., Lottonen-Raikaslehto, L., Parviainen, V., Huusko, J., Pikkarainen, S., Mendel, M., Laham-Karam, N., Kärjä, V., Rissanen, R., Hedman, M., and Ylä-Herttuala, S. (2016). Efficacy and safety of myocardial gene transfer of adenovirus, adeno-associated virus and lentivirus vectors in the mouse heart. *Gene Ther.* 23, 296–305.
  72. Hordeaux, J., Hinderer, C., Goode, T., Buza, E.L., Bell, P., Calcedo, R., Richman, L.K., and Wilson, J.M. (2018). Toxicology Study of Intra-Cisterna Magna Adeno-Associated Virus 9 Expressing Iduronate-2-Sulfatase in Rhesus Macaques. *Mol. Ther. Methods Clin. Dev.* 10, 68–78.
  73. Hordeaux, J., Hinderer, C., Goode, T., Katz, N., Buza, E.L., Bell, P., Calcedo, R., Richman, L.K., and Wilson, J.M. (2018). Toxicology Study of Intra-Cisterna Magna

- Adeno-Associated Virus 9 Expressing Human Alpha-L-Iduronidase in Rhesus Macaques. *Mol. Ther. Methods Clin. Dev.* *10*, 79–88.
74. Rabinowitz, J.E., Rolling, F., Li, C., Conrath, H., Xiao, W., Xiao, X., and Samulski, R.J. (2002). Cross-packaging of a single adeno-associated virus (AAV) type 2 vector genome into multiple AAV serotypes enables transduction with broad specificity. *J. Virol.* *76*, 791–801.
75. Luna, L.G. (1992). *Histopathologic Methods and Color Atlas of Special Stains and Tissue Artifacts* (American Histolabs).
76. Ainsworth, S.K., and Karnovsky, M.J. (1972). An ultrastructural staining method for enhancing the size and electron opacity of ferritin in thin sections. *J. Histochem. Cytochem.* *20*, 225–229.

**OMTM, Volume 19**

## **Supplemental Information**

**High Levels of Frataxin Overexpression**

**Lead to Mitochondrial and Cardiac**

**Toxicity in Mouse Models**

**Brahim Belbellaa, Laurence Reutenauer, Nadia Messaddeq, Laurent Monassier, and H el ene Puccio**

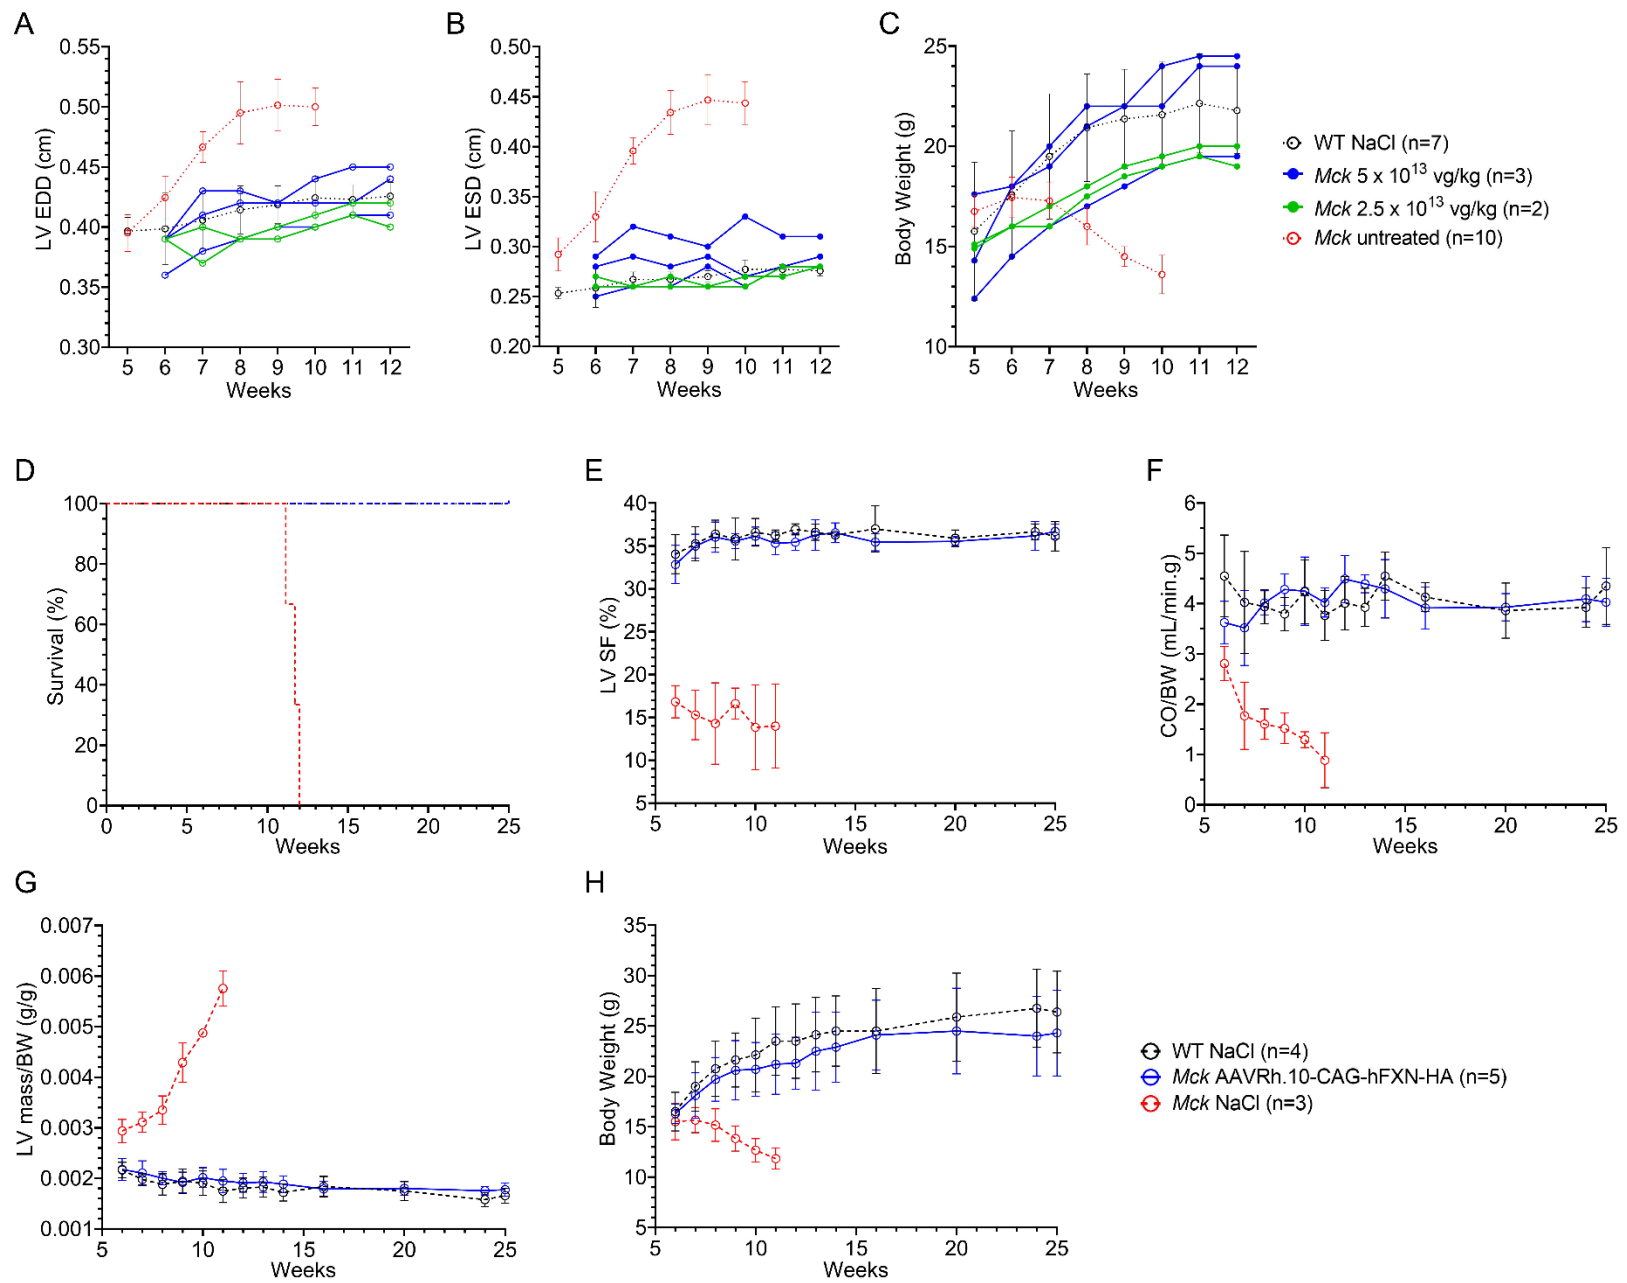

**Figure S1. Extended longitudinal echocardiography evaluation of *Mck* mice treated at 5 weeks of age with AAVRh.10-CAG-hFXN-HA vector, up to 25 weeks of age.** See also figure 1. (A-C) WT mice treated with NaCl (n=7) and *Mck* mice treated at  $5 \times 10^{13}$  (n=3) or  $2.5 \times 10^{13}$  (n=2) vg/kg and sacrificed at 12 weeks of age for histological and molecular analysis. Data are represented as individual kinetics for treated *Mck* mice. Control WT mice and untreated *Mck* mice are reported as mean  $\pm$  SD. For untreated *Mck* mice, historical data were plotted. Statistical analyses are reported in Table S2. Figure adapted from Belbellaa et al 2019 Human Molecular Genetics. (A) Left ventricle (LV) end-diastole diameter (LV EDD). (B) LV end-systole diameter (LV ESD). (C) Body weight. (D-G) Cohort of mice treated similarly and followed-up until 25 weeks of age. *Mck* mice treated at  $5 \times 10^{13}$  vg/kg (n=5), WT (n=4) and *Mck* (n=3) mice treated with NaCl. Data are reported as mean  $\pm$  SD and statistical analyses are reported in Table S3. (D) Survival analysis. Log-rank Mantel-Cox statistical test: WT vs *Mck* AAV,  $p > 0.999$ ; WT vs *Mck* NaCl,  $p = 0.0101$ ; *Mck* AAV vs *Mck* NaCl,  $p = 0.0042$ . (E) LV shortening fraction. (F) Cardiac blood output measured at the aorta (CO) and normalized to body weight (BW). (G) LV mass normalized to BW. (H) Body weight.

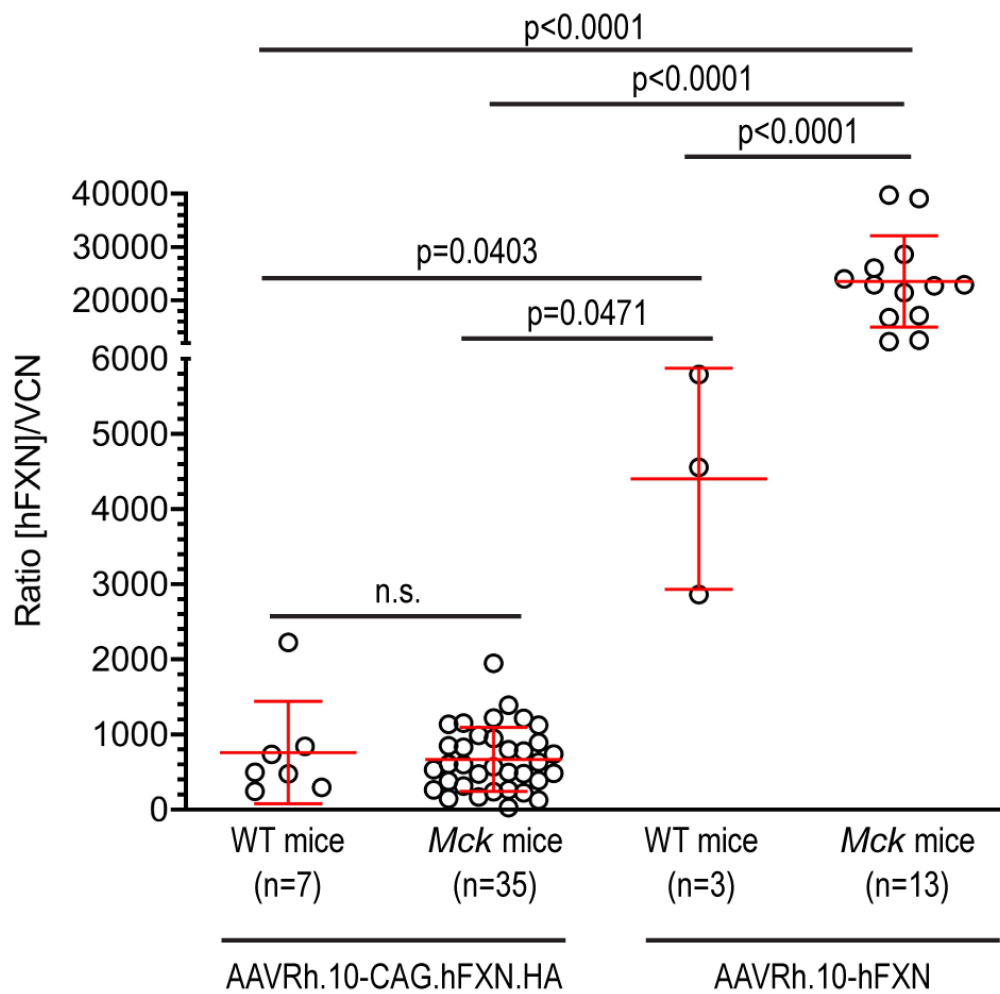

**Figure S2. Comparison of AAVRh.10-CAG-hFXN-HA and AAVRh.10-hFXN vectors expression in the heart of WT and *Mck* mice treated at 7 weeks and sacrificed at 15 weeks.** Vector biodistribution and expression were quantified in each individual mouse heart. The tissue concentration in human FXN protein was measured by ELISA assay (expressed as ng of FXN per mg of total protein) and normalized by the average vector DNA copies per diploid genome. WT mice (n=7) injected with the AAVRh.10-CAG-hFXN-HA vector, as well as WT mice (n=3) and *Mck* mice (n=13) injected with the AAVRh.10-hFXN, correspond to mice injected for the present study, see Table S1. *Mck* mice (n=35) injected with the AAVRh.10-CAG-hFXN-HA vector, correspond to historical data from our previous dose response study, where mice were treated at 5 or 7 weeks of age, with doses ranging from  $5 \times 10^{13}$  down to  $1 \times 10^{12}$  vg/kg, see Belbellaa et al 2019 Human Molecular Genetic. Individual datapoint are reported, with mean and SD. Brown-Forsythe and Welch one-way ANOVA statistical test, p values are reported with n.s.  $p > 0.05$ .

Colocalization analysis - Low magnification

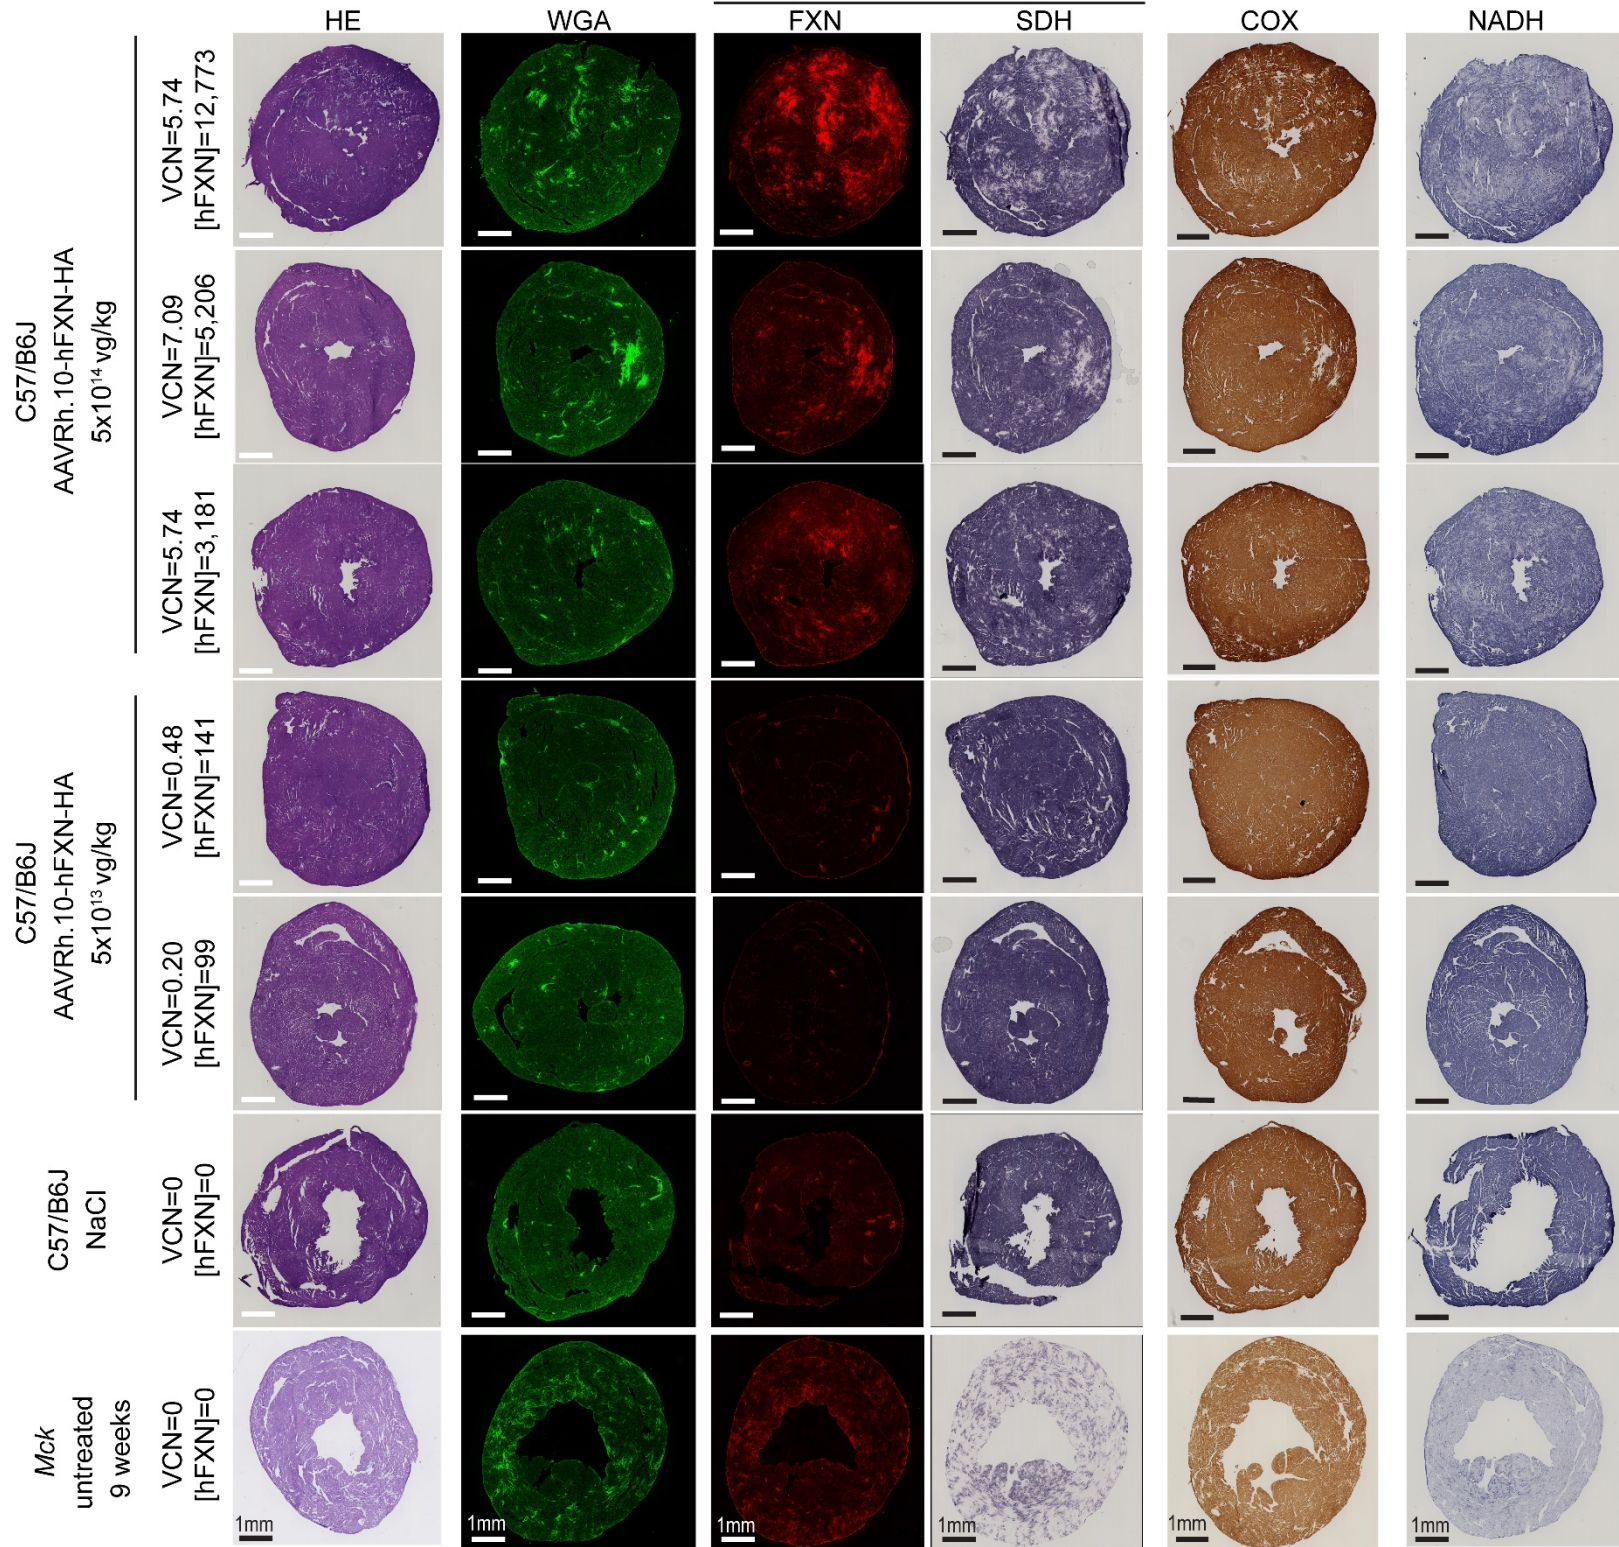



**Figure S3. Extended histological analysis and observation at low-magnification of heart tissue section from wild-type C57/B6J mice treated with AAVRh.10-CAG-FXN-HA vector.** See also figures 2 and 3. Representative images from the histological analysis of adjacent heart tissue section collected from WT C57/B6J mice treated at 7-weeks of age with vehicle (n=1) or AAVRh.10-CAG-hFXN-HA vector at the dose of  $5 \times 10^{14}$  (n=4) or  $5 \times 10^{13}$  (n=3) vg/kg, and then sacrificed at 21 weeks of age. For control, we analyzed heart tissue sections from untreated *Mck* mice collected at 9 weeks of age (Table S1). The two left columns correspond to histological analysis of heart fibrosis following staining with hematoxylin-eosin (HE) or wheat germ agglutinin conjugated to Alexa488nm (WGA). The two middle columns represent single tissue section and microscopy field, after co-staining of FXN-HA by immunofluorescence and succinate dehydrogenase (SDH) activity by *in-situ* histoenzymatic assay, in order to assess the colocalization of FXN overexpression hotspots and the impairment of SDH enzymatic activity. The two-right columns correspond to *in-situ* histoenzymatic activity assay for cytochrome c oxidase (COX) and NADH-ubiquinone oxidoreductase (NADH). The corresponding dose, VCN and [hFXN] are reported next to each image series. Scale bar, 1mm. Same time exposure used for each labelling series.

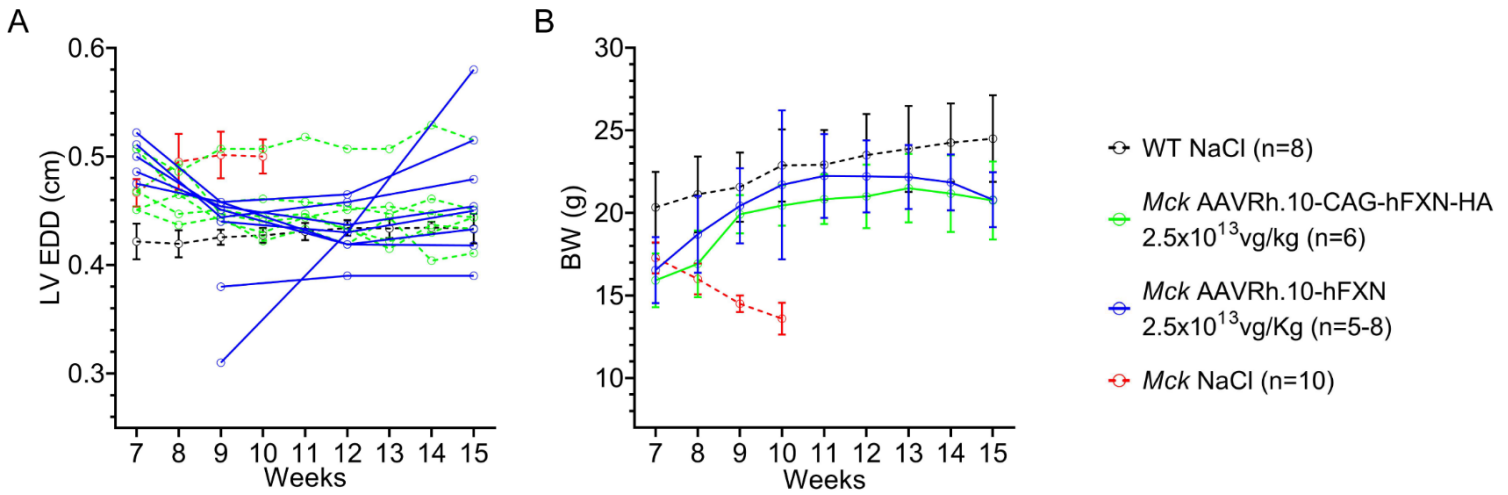

**Figure S4. Supplementary longitudinal echocardiography analysis of *Mck* mice treated at 7 weeks of age with AAVRh.10-CAG-hFXN-HA or AAVRh.10-hFXN vector at  $2.5 \times 10^{13}$  vg/kg.** See also figure 5. **(A)** Left ventricle (LV) end-diastole diameter (LV EDD). Data are represented as individual kinetics for treated *Mck* mice with AAVRh.10-CAG-hFXN-HA (n=6) or with AAVRh.10-hFXN (n=8) vector. Control NaCl-injected WT (n=8) and *Mck* mice (n=10) are reported as mean  $\pm$  SD. Statistical analysis is reported in Table S4. **(B)** Body weight (BW) are reported as mean  $\pm$  SD. For untreated *Mck* mice, historical data were plotted.

A

WT AAVRh.10-hFXN  
VCN=0.08; [hFXN]=355WT NaCl  
VCN=0; [hFXN]=0Untreated *Mck*  
9 weeks of age

Untreated WT spleen

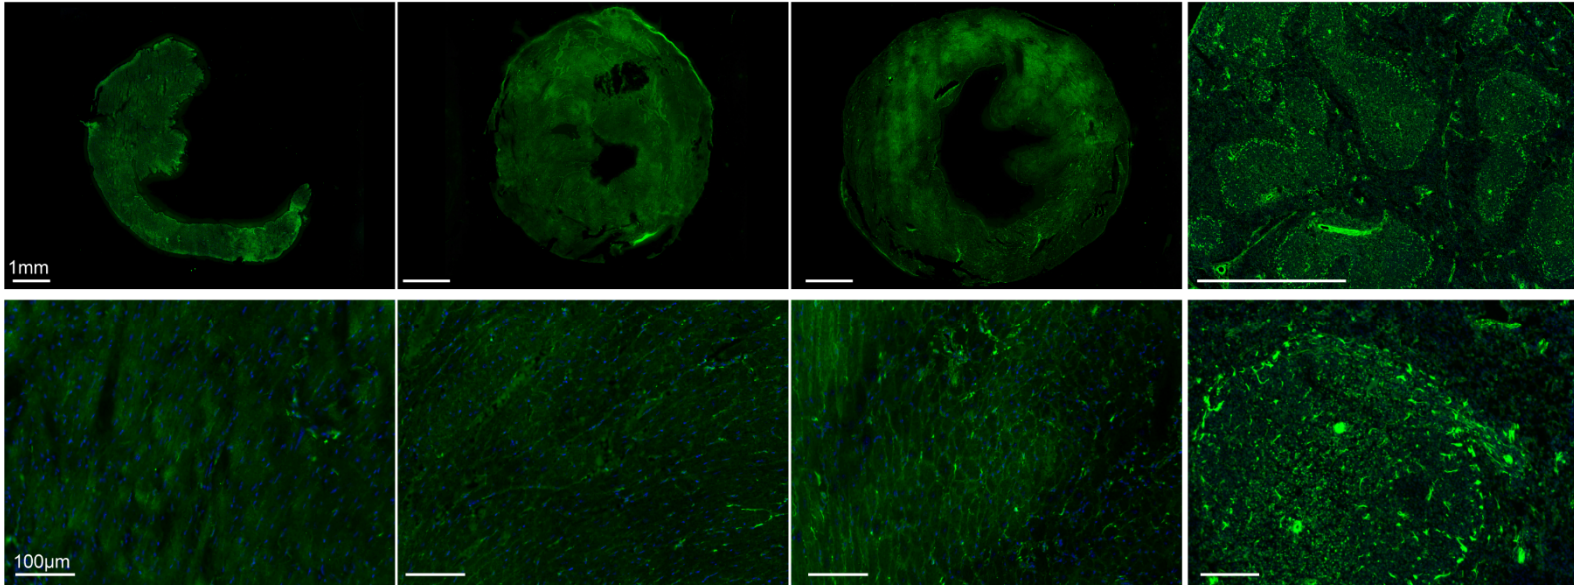

B

*Mck* AAVRh.10-hFXN  $2.5 \times 10^{13}$ vg/kg*Mck* AAVRh.10-hFXN-HA  $2.5 \times 10^{13}$ vg/kg

VCN=0.87; [hFXN]=34,095

VCN=0.96; [hFXN]=37,969

VCN=1.04; [hFXN]=393

VCN=1.25; [hFXN]=924

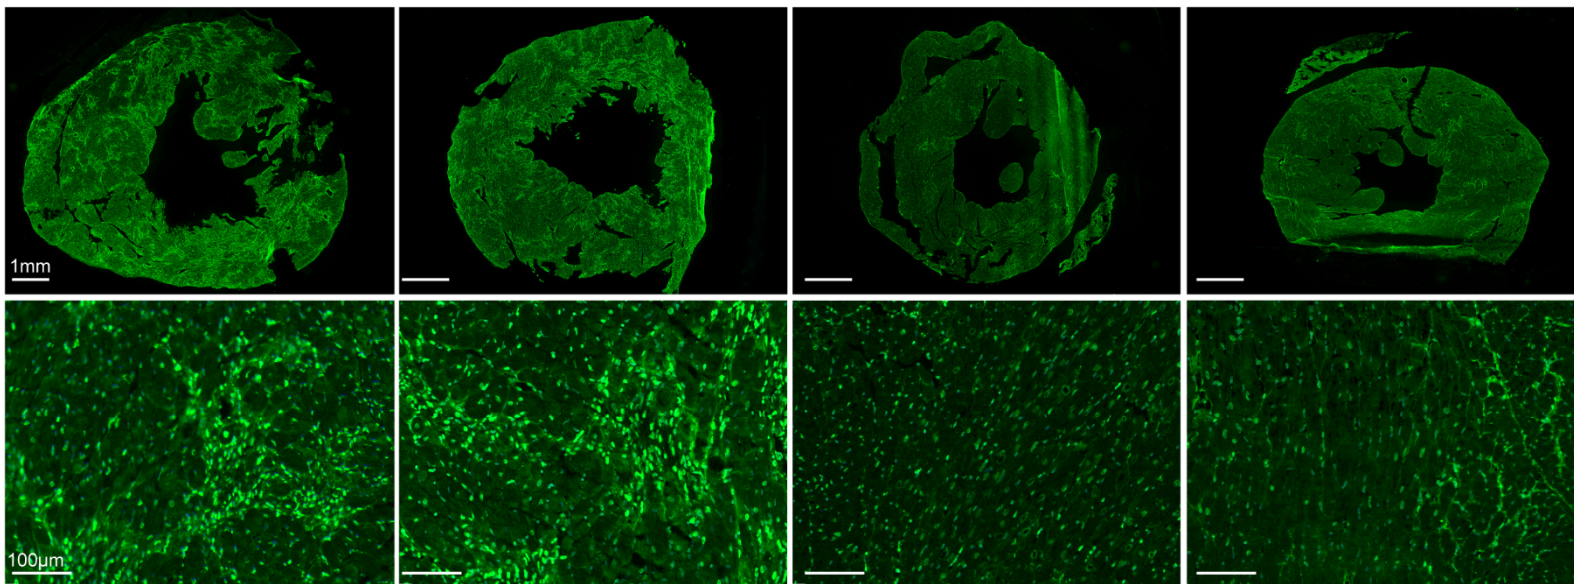WT AAVRh.10-hFXN  
VCN=0.08; [hFXN]=355WT NaCl  
VCN=0; [hFXN]=0Untreated *Mck*  
9 weeks of age

Untreated WT spleen

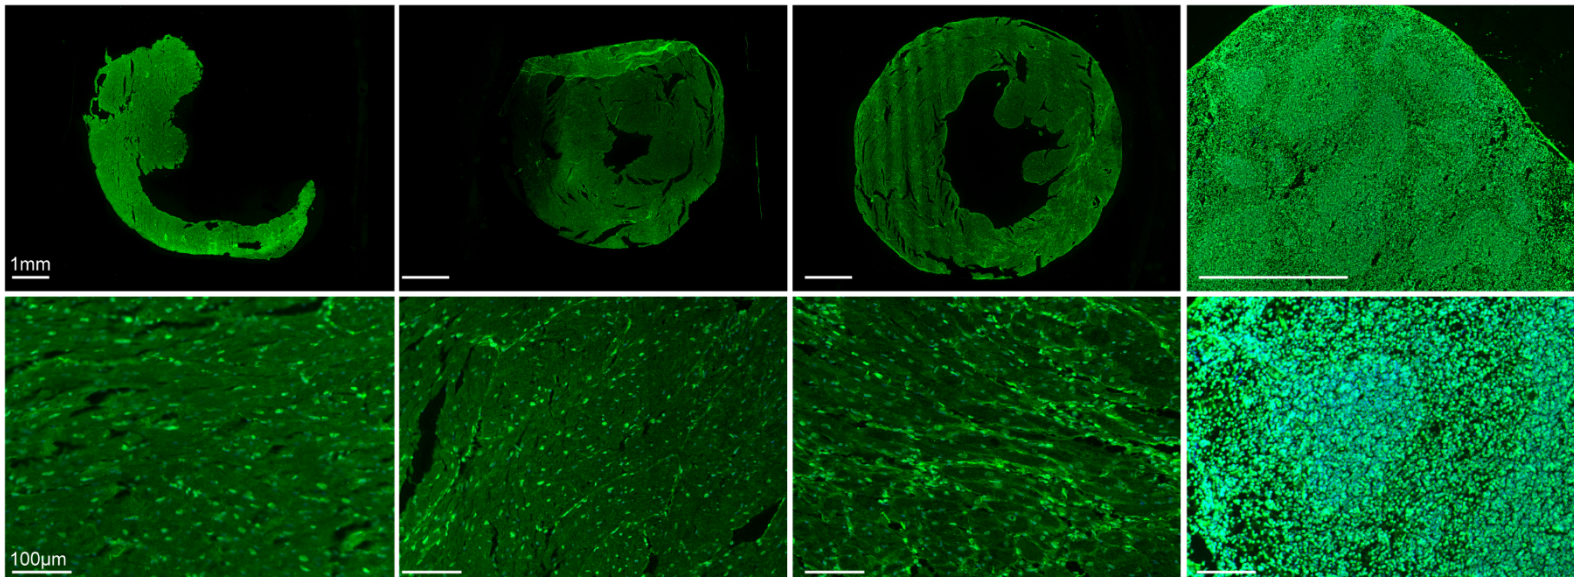

C

*Mck* AAVRh.10-hFXN  $2.5 \times 10^{13}$ vg/kg*Mck* AAVRh.10-hFXN-HA  $2.5 \times 10^{13}$ vg/kg

VCN=0.87; [hFXN]=34,095

VCN=0.96; [hFXN]=37,969

VCN=1.04; [hFXN]=393

VCN=1.25; [hFXN]=924

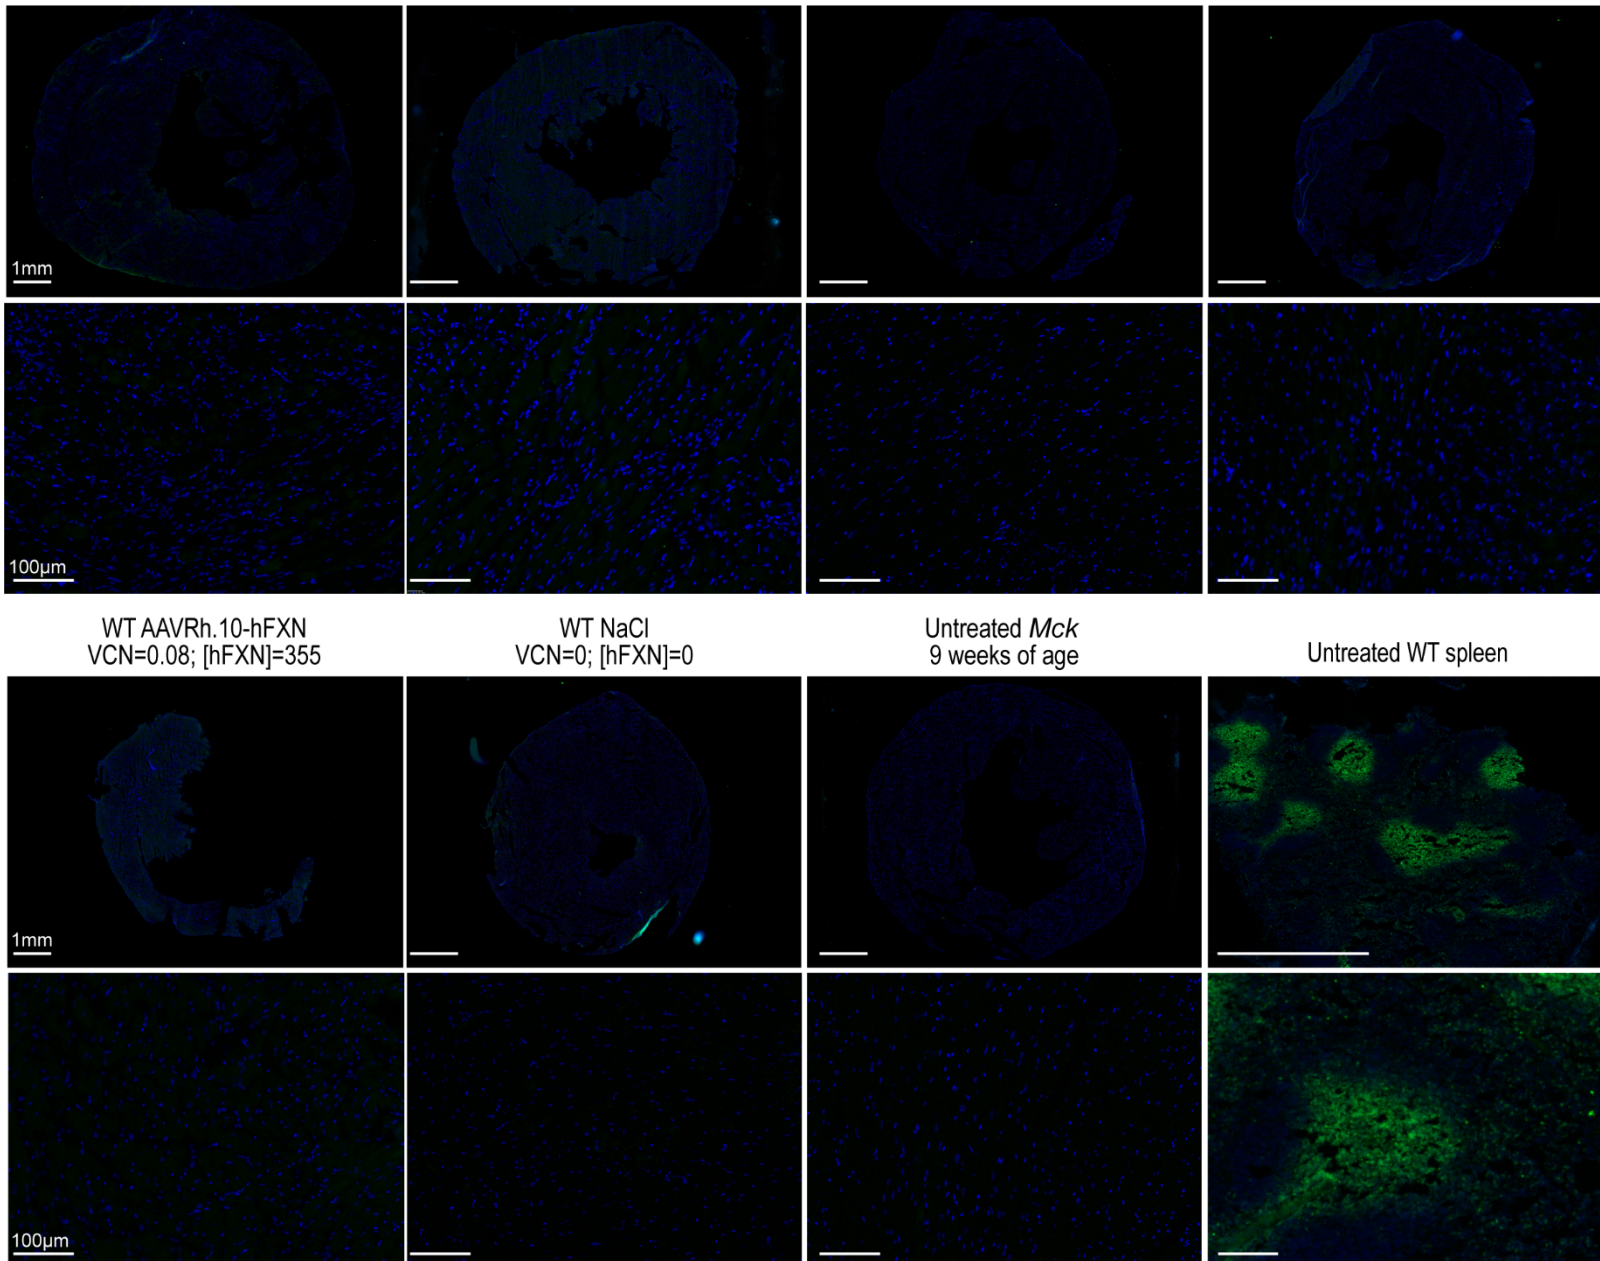

**Figure S5. Extended histological analysis of immune cells infiltration in the heart of *Mck* and wild-type mice treated at 7 weeks with AAVRh.10-hFXN or AAVRh.10-CAG-hFXN-HA vector and sacrificed at 15 weeks.** See also figure 6. Representative histological analysis on adjacent heart tissue sections from *Mck* mice treated with AAVRh.10-hFXN (n=3) or AAVRh.10-CAG-hFXN-HA (n=3) at  $2.5 \times 10^{13}$ vg/kg, WT mouse injected with AAVRh.10-hFXN (n=1) at  $5 \times 10^{12}$ vg/kg, NaCl-injected WT mice (n=3). For control, 9-weeks old untreated *Mck* mice heart and WT mouse spleen (n=1) were also analyzed. **(A)** Immunofluorescence labelling of the monocyte cells marker CD14. **(B)** Immunofluorescence labelling of the leukocyte cells marker CD45. **(C)** Immunofluorescence labelling of the lymphocyte cells marker CD3.

A

## Colocalization analysis - low magnification

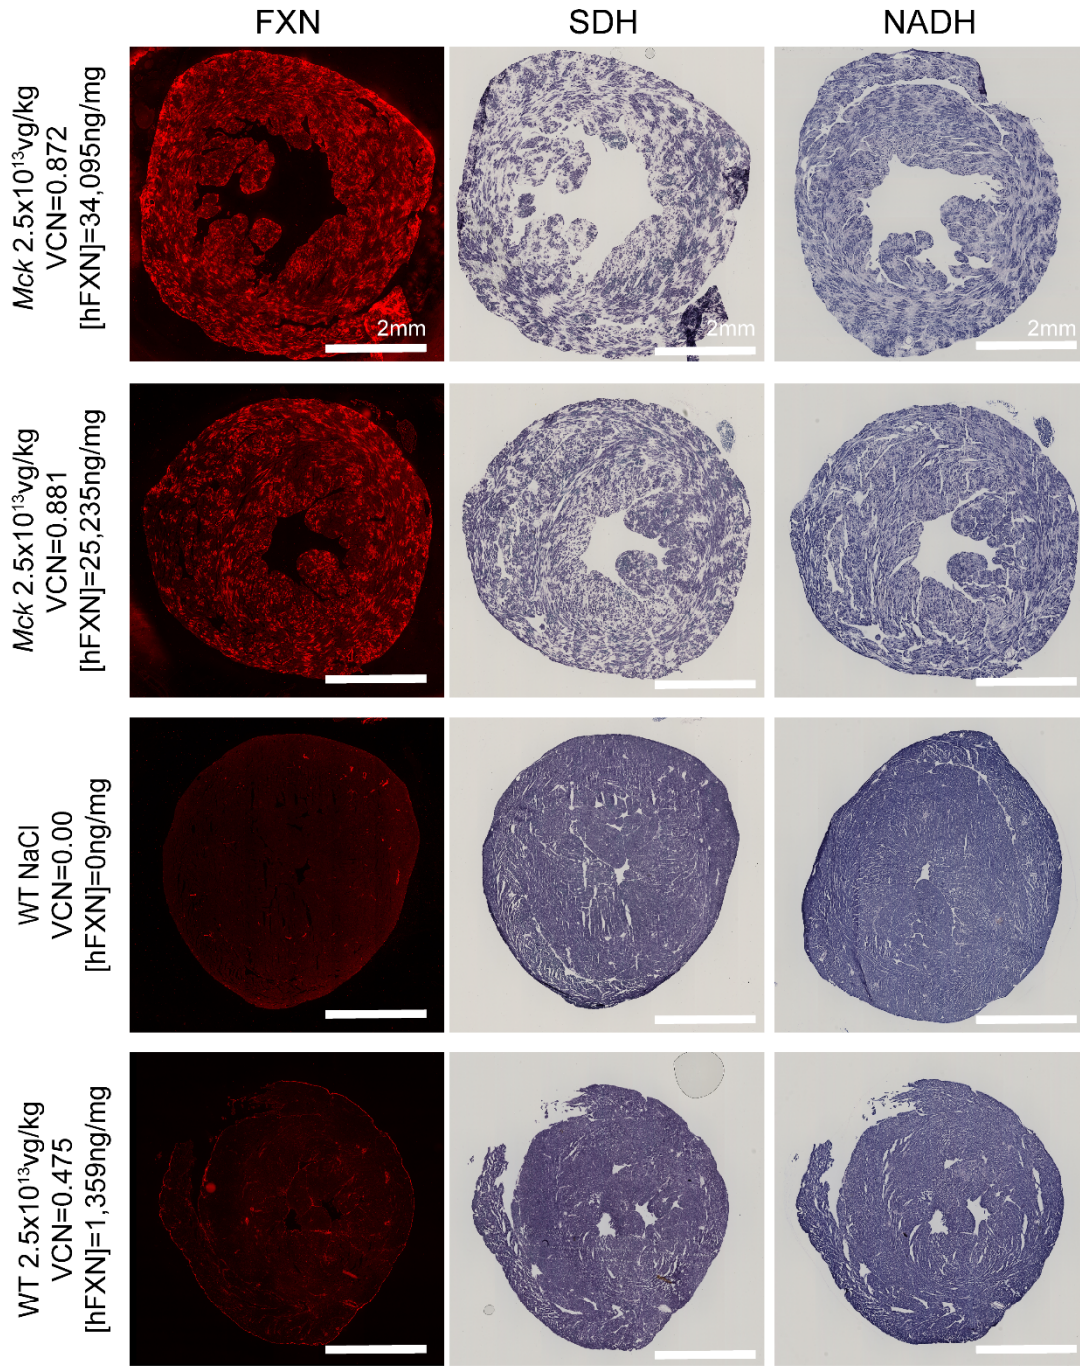

B

## SDH

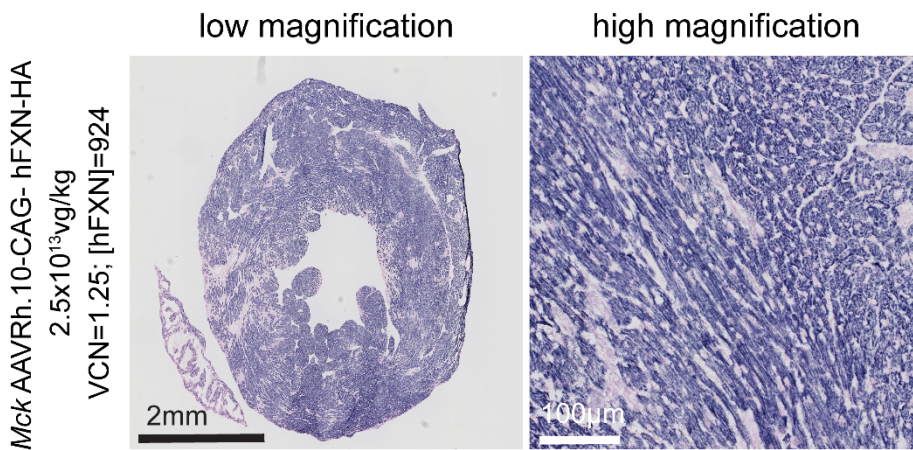

**Figure S6. Extended histological analysis of mitochondrial enzymatic activity and observation at low-magnification of heart tissue sections from wild-type and *Mck* mice treated at 7 weeks with AAVRh.10-hFXN or AAVRh.10-CAG-hFXN-HA vector at  $2.5 \times 10^{13}$  vg/kg and sacrificed at 15 weeks. See also figure 7.**

**(A)** Representative image and histological analysis of adjacent heart tissue sections from *Mck* mice (n=3) and WT mice (n=2) treated with AAVRh.10-hFXN vector and NaCl-injected WT mice (n=2). Left and middle columns represent the single tissue sections and microscopy fields, after co-staining of FXN by immunofluorescence and succinate dehydrogenase (SDH) activity by *in-situ* histoenzymatic assay, in order to assess the colocalization of FXN overexpression hotspots and the impairment of SDH enzymatic activity. Right-column corresponds to *in-situ* histoenzymatic activity assay for NADH-ubiquinone oxidoreductase (NADH). **(B)** *In situ* histoenzymatic assay performed on heart tissue section from a *Mck* mouse treated with AAVRh.10-CAG-hFXN-HA vector and imaged at low and high magnifications. The respective dose, VCN and [hFXN] are reported above each image series. Same time exposure for each labelling series.

**Video S1. Echocardiography parasternal short-axis imaging of the left ventricle performed at 21 weeks of age, in wild-type C57/B6J mice treated with AAVRh.10-CAG-FXN-HA vector at 7 weeks of age.**

**Table S1.** Experimental design: summary of mice age of injection, vector and dose administered, effective and bioanalytical.

| Age of treatment in weeks | Animal groups | Genotype        | Treatment/vector     | Dose (vg/kg)         | Effective             | Age of sacrifice in weeks | Bioanalytical                                                                                                            |
|---------------------------|---------------|-----------------|----------------------|----------------------|-----------------------|---------------------------|--------------------------------------------------------------------------------------------------------------------------|
| Untreated                 | A             | <i>Mck</i> mice | None                 | N/A                  | 6                     | 9*                        | Histological analysis                                                                                                    |
|                           | B             |                 |                      |                      | 4                     | 8*                        | Electron microscopy                                                                                                      |
|                           | C             |                 |                      |                      | 10 - historical data† | spontaneous death         | Echocardiography<br>Survival                                                                                             |
| 5 weeks of age            | 1             | <i>Mck</i> mice | AAVRh.10-CAG-hFXN-HA | 5x10 <sup>13</sup>   | 3                     | 12§                       | Echocardiography<br>Vector biodistribution/expression<br>Histological analysis                                           |
|                           | 2             |                 |                      | 2.5x10 <sup>13</sup> | 2                     |                           |                                                                                                                          |
|                           | 3             |                 |                      | 5x10 <sup>13</sup>   | 5                     | 25‡                       | Echocardiography                                                                                                         |
|                           | 4             | NaCl            | N/A                  | 3                    |                       |                           |                                                                                                                          |
|                           | 5             | WT mice         | NaCl                 | N/A                  | 7                     |                           |                                                                                                                          |
|                           | 6             |                 |                      | N/A                  | 4                     | 25‡                       | Echocardiography                                                                                                         |
| 7 weeks of age            | 7             | <i>Mck</i> mice | AAVRh.10-CAG-hFXN-HA | 2.5x10 <sup>13</sup> | 6                     | 22¶                       | Echocardiography<br>vector biodistribution/expression<br>Histology analysis<br>Molecular analysis<br>Electron microscopy |
|                           | 8             |                 | AAVRh.10-hFXN        | 2.5x10 <sup>13</sup> | 8                     | 22¶                       |                                                                                                                          |
|                           | 9             | WT mice         | AAVRh.10-CAG-hFXN-HA | 5x10 <sup>14</sup>   | 4                     | 15**                      |                                                                                                                          |
|                           | 10            |                 | AAVRh.10-CAG-hFXN-HA | 5x10 <sup>13</sup>   | 3                     | 15**                      |                                                                                                                          |
|                           | 11            |                 | AAVRh.10-hFXN        | 2.5x10 <sup>13</sup> | 2                     | 15**                      |                                                                                                                          |
|                           | 12            |                 | AAVRh.10-hFXN        | 5x10 <sup>12</sup>   | 1                     | 15**                      |                                                                                                                          |
|                           | 13            |                 | NaCl                 | N/A                  | 11                    | 15** or 22¶               |                                                                                                                          |

Note: *Mck* and WT mice are on 100% C57/B6J genetic background.

Groups A, B and C correspond to untreated *Mck* mice which were used as controls across the different mice studies.

\* untreated *Mck* mice median survival is around 10 weeks of age, so groups A and B were sacrifice at 8 and 9 weeks of age to generate control tissues.

† *Mck* knock-out mice display a very robust and reproducible phenotype as demonstrated previously across several studies, such as Puccio et al 2001 Nature genetics, Seznec et al 2004 Human Molecular Genetics and Perdomini et al 2014 Nature Medicine. To reduce the number of mice used to follow the three-R ethical rules, historical echocardiography *Mck* mice data were used here.

Groups 1, 2 and 5 corresponds to mice originating from our previous dose response study, where mice were treated at 5 or 7 weeks of age, with doses ranging from 5x10<sup>13</sup> down to 1x10<sup>12</sup> vg/kg, see Belbellaa et al 2019 Human Molecular Genetic.

§ Mice sacrificed at 12 weeks of age for histological and molecular analysis. ‡ Mice sacrificed at 25 weeks of age for long term echocardiography follow-up.

\*\* Mice sacrificed at 15 weeks or at 22 weeks of age for histological and molecular analysis.



**Table S2. Statistical analysis of echocardiography measurements presented in Figures 1D-F and S1A-C.**

*Mck* mice treated at 5 weeks of age with AAVRh.10-CAG-hFXN-HA vector at  $5 \times 10^{13}$  or  $2.5 \times 10^{13}$  vg/kg and sacrificed at 12 weeks of age. One-way ANOVA analysis, Mixed-effects model (REML), no assumption of sphericity,  $\alpha = 0.05$ .

| <b>Left ventricle shortening fraction</b>                                                 |                                       |                                       |                  |
|-------------------------------------------------------------------------------------------|---------------------------------------|---------------------------------------|------------------|
| Fixed effect (type III) <0.0001                                                           | F (DFn, DFd) F (1.135, 9.079) = 49.42 | Geisser-Greenhouse's epsilon = 0.3783 |                  |
| Tukey's multiple comparisons test                                                         | Mean Diff.                            | 95.00% CI of diff.                    | Adjusted P Value |
| WT NaCl (n=7) vs. <i>Mck</i> $5 \times 10^{13}$ vg/kg (n=3)                               | 4.250                                 | 1.743 to 6.757                        | <b>0.0044</b>    |
| WT NaCl (n=7) vs. <i>Mck</i> $2.5 \times 10^{13}$ vg/kg (n=2)                             | 1.869                                 | 0.02753 to 3.711                      | <b>0.0471</b>    |
| WT NaCl (n=7) vs. <i>Mck</i> untreated (n=10)                                             | 18.82                                 | 10.45 to 27.19                        | <b>0.0016</b>    |
| <i>Mck</i> $5 \times 10^{13}$ vg/kg (n=3) vs. <i>Mck</i> $2.5 \times 10^{13}$ vg/kg (n=2) | -2.381                                | -4.643 to -0.1192                     | <b>0.0406</b>    |
| <i>Mck</i> $5 \times 10^{13}$ vg/kg (n=3) vs. <i>Mck</i> untreated (n=10)                 | 14.57                                 | 4.878 to 24.26                        | <b>0.0123</b>    |
| <i>Mck</i> $2.5 \times 10^{13}$ vg/kg (n=2) vs. <i>Mck</i> untreated (n=10)               | 16.95                                 | 7.139 to 26.76                        | <b>0.0074</b>    |
| <b>Cardiac output normalized to body weight</b>                                           |                                       |                                       |                  |
| Fixed effect (type III) <0.0001                                                           | F (DFn, DFd) F (1.590, 12.72) = 90.72 | Geisser-Greenhouse's epsilon = 0.5299 |                  |
| Tukey's multiple comparisons test                                                         | Mean Diff.                            | 95.00% CI of diff.                    | Adjusted P Value |
| WT NaCl (n=7) vs. <i>Mck</i> $5 \times 10^{13}$ vg/kg (n=3)                               | 0.09299                               | -0.4230 to 0.6090                     | 0.9207           |
| WT NaCl (n=7) vs. <i>Mck</i> $2.5 \times 10^{13}$ vg/kg (n=2)                             | 0.2953                                | -0.2019 to 0.7926                     | 0.2669           |
| WT NaCl (n=7) vs. <i>Mck</i> untreated (n=10)                                             | 2.727                                 | 1.868 to 3.586                        | <b>0.0003</b>    |
| <i>Mck</i> $5 \times 10^{13}$ vg/kg (n=3) vs. <i>Mck</i> $2.5 \times 10^{13}$ vg/kg (n=2) | 0.2024                                | -0.08695 to 0.4917                    | 0.1728           |
| <i>Mck</i> $5 \times 10^{13}$ vg/kg (n=3) vs. <i>Mck</i> untreated (n=10)                 | 2.634                                 | 1.374 to 3.894                        | <b>0.0036</b>    |
| <i>Mck</i> $2.5 \times 10^{13}$ vg/kg (n=2) vs. <i>Mck</i> untreated (n=10)               | 2.432                                 | 1.454 to 3.410                        | <b>0.0019</b>    |
| <b>Left ventricle mass normalized to body</b>                                             |                                       |                                       |                  |
| Fixed effect (type III) = 0.0014                                                          | F (DFn, DFd) F (1.015, 8.123) = 22.10 | Geisser-Greenhouse's epsilon = 0.3385 |                  |
| Tukey's multiple comparisons test                                                         | Mean Diff.                            | 95.00% CI of diff.                    | Adjusted P Value |
| WT NaCl (n=7) vs. <i>Mck</i> $5 \times 10^{13}$ vg/kg (n=3)                               | 7.256e-005                            | -2.800e-005 to 0.0001731              | 0.1575           |
| WT NaCl (n=7) vs. <i>Mck</i> $2.5 \times 10^{13}$ vg/kg (n=2)                             | 8.208e-005                            | -2.791e-006 to 0.0001670              | 0.0571           |
| WT NaCl (n=7) vs. <i>Mck</i> untreated (n=10)                                             | -0.001551                             | -0.003006 to -9.562e-005              | 0.0395           |
| <i>Mck</i> $5 \times 10^{13}$ vg/kg (n=3) vs. <i>Mck</i> $2.5 \times 10^{13}$ vg/kg (n=2) | 9.524e-006                            | -9.986e-005 to 0.0001189              | 0.9895           |
| <i>Mck</i> $5 \times 10^{13}$ vg/kg (n=3) vs. <i>Mck</i> untreated (n=10)                 | -0.001624                             | -0.002941 to -0.0003064               | <b>0.0249</b>    |
| <i>Mck</i> $2.5 \times 10^{13}$ vg/kg (n=2) vs. <i>Mck</i> untreated (n=10)               | -0.001633                             | -0.003034 to -0.0002318               | <b>0.0302</b>    |
| <b>Left ventricle end diastole diameter</b>                                               |                                       |                                       |                  |
| Fixed effect (type III) = 0.0023                                                          | F (DFn, DFd) F (1.074, 6.086) = 24.40 | Geisser-Greenhouse's epsilon = 0.3580 |                  |
| Tukey's multiple comparisons test                                                         | Mean Diff.                            | 95.00% CI of diff.                    | Adjusted P Value |
| WT NaCl (n=7) vs. <i>Mck</i> $5 \times 10^{13}$ vg/kg (n=3)                               | 0.000                                 | -0.01115 to 0.01115                   | >0.9999          |
| WT NaCl (n=7) vs. <i>Mck</i> $2.5 \times 10^{13}$ vg/kg (n=2)                             | 0.01476                               | 0.005639 to 0.02388                   | <b>0.0056</b>    |
| WT NaCl (n=7) vs. <i>Mck</i> untreated (n=10)                                             | -0.05041                              | -0.09929 to -0.001542                 | <b>0.0446</b>    |
| <i>Mck</i> $5 \times 10^{13}$ vg/kg (n=3) vs. <i>Mck</i> $2.5 \times 10^{13}$ vg/kg (n=2) | 0.01476                               | -0.0006284 to 0.03015                 | 0.0589           |
| <i>Mck</i> $5 \times 10^{13}$ vg/kg (n=3) vs. <i>Mck</i> untreated (n=10)                 | -0.05041                              | -0.09703 to -0.003798                 | <b>0.0387</b>    |
| <i>Mck</i> $2.5 \times 10^{13}$ vg/kg (n=2) vs. <i>Mck</i> untreated (n=10)               | -0.06518                              | -0.1239 to -0.006452                  | <b>0.0355</b>    |
| <b>Left ventricle end systole diameter</b>                                                |                                       |                                       |                  |
| Fixed effect (type III) = 0.0016                                                          | F (DFn, DFd) F (1.010, 5.721) = 31.31 | Geisser-Greenhouse's epsilon = 0.3365 |                  |
| Tukey's multiple comparisons test                                                         | Mean Diff.                            | 95.00% CI of diff.                    | Adjusted P Value |
| WT NaCl (n=7) vs. <i>Mck</i> $5 \times 10^{13}$ vg/kg (n=3)                               | -0.01839                              | -0.02474 to -0.01205                  | <b>0.0002</b>    |
| WT NaCl (n=7) vs. <i>Mck</i> $2.5 \times 10^{13}$ vg/kg (n=2)                             | 0.001131                              | -0.008187 to 0.01045                  | 0.9729           |
| WT NaCl (n=7) vs. <i>Mck</i> untreated (n=10)                                             | -0.1221                               | -0.2032 to -0.04113                   | <b>0.0097</b>    |
| <i>Mck</i> $5 \times 10^{13}$ vg/kg (n=3) vs. <i>Mck</i> $2.5 \times 10^{13}$ vg/kg (n=2) | 0.01952                               | 0.008714 to 0.03033                   | <b>0.0032</b>    |
| <i>Mck</i> $5 \times 10^{13}$ vg/kg (n=3) vs. <i>Mck</i> untreated (n=10)                 | -0.1037                               | -0.1842 to -0.02330                   | <b>0.0213</b>    |

**Table S3. Statistical analysis of echocardiography measurements presented in Figure S1D-H.**

*Mck* mice treated at 5 weeks of age with AAVRh.10-CAG-hFXN-HA vector at  $5 \times 10^{13}$ vg/kg and sacrificed at 25 weeks of age. One-way ANOVA analysis, Mixed-effects model (REML), no assumption of sphericity,  $\alpha = 0.05$ .

| <b>Left ventricle shortening fraction</b>                               |                                       |                                       |                   |
|-------------------------------------------------------------------------|---------------------------------------|---------------------------------------|-------------------|
| Fixed effect (type III) <b>&lt;0.0001</b>                               | F (1.122, 16.28) = 1093               | Geisser-Greenhouse's epsilon = 0.5612 |                   |
| Tukey's multiple comparisons test                                       | Mean Diff.                            | 95.00% CI of diff.                    | Adjusted P Value  |
| WT NaCl (n=4) vs. <i>Mck</i> AAV $5 \times 10^{13}$ vg/kg (n=5)         | 0.5254                                | 0.06266 to 0.9881                     | <b>0.0263</b>     |
| WT NaCl (n=4) vs. <i>Mck</i> NaCl (n=3)                                 | 21.00                                 | 18.49 to 23.50                        | <b>&lt;0.0001</b> |
| <i>Mck</i> AAV $5 \times 10^{13}$ vg/kg (n=5) vs. <i>Mck</i> NaCl (n=3) | 20.47                                 | 17.76 to 23.18                        | <b>&lt;0.0001</b> |
| <b>Cardiac output normalized to body weight</b>                         |                                       |                                       |                   |
| Fixed effect (type III) <b>&lt;0.0001</b>                               | F (0.9670, 14.02) = 107.1             | Geisser-Greenhouse's epsilon = 0.4835 |                   |
| Tukey's multiple comparisons test                                       | Mean Diff.                            | 95.00% CI of diff.                    | Adjusted P Value  |
| WT NaCl (n=4) vs. <i>Mck</i> AAV $5 \times 10^{13}$ vg/kg (n=5)         | 0.01580                               | -0.2946 to 0.3262                     | 0.9899            |
| WT NaCl (n=4) vs. <i>Mck</i> NaCl (n=3)                                 | 2.435                                 | 1.925 to 2.945                        | <b>&lt;0.0001</b> |
| <i>Mck</i> AAV $5 \times 10^{13}$ vg/kg (n=5) vs. <i>Mck</i> NaCl (n=3) | 2.419                                 | 1.411 to 3.427                        | <b>0.0013</b>     |
| <b>Left ventricle mass normalized to body</b>                           |                                       |                                       |                   |
| Fixed effect (type III) <b>&lt;0.0001</b>                               | F (DFn, DFd) F (1.015, 8.123) = 22.10 | Geisser-Greenhouse's epsilon = 0.3385 |                   |
| Tukey's multiple comparisons test                                       | Mean Diff.                            | 95.00% CI of diff.                    | Adjusted P Value  |
| WT NaCl (n=4) vs. <i>Mck</i> AAV $5 \times 10^{13}$ vg/kg (n=5)         | -9.278e-005                           | -0.0001489 to -3.670e-005             | <b>0.0022</b>     |
| WT NaCl (n=4) vs. <i>Mck</i> NaCl (n=3)                                 | -0.002223                             | -0.003625 to -0.0008206               | <b>0.0083</b>     |
| <i>Mck</i> AAV $5 \times 10^{13}$ vg/kg (n=5) vs. <i>Mck</i> NaCl (n=3) | -0.002130                             | -0.003489 to -0.0007711               | <b>0.0087</b>     |
| <b>Body weight</b>                                                      |                                       |                                       |                   |
| Fixed effect (type III) = <b>0.0003</b>                                 | F (1.024, 8.700) = 33.02              | Geisser-Greenhouse's epsilon = 0.5118 |                   |
| Tukey's multiple comparisons test                                       | Mean Diff.                            | 95.00% CI of diff.                    | Adjusted P Value  |
| WT NaCl (n=4) vs. <i>Mck</i> AAV $5 \times 10^{13}$ vg/kg (n=5)         | 1.456                                 | 0.9015 to 2.010                       | <b>&lt;0.0001</b> |
| WT NaCl (n=4) vs. <i>Mck</i> NaCl (n=3)                                 | 8.899                                 | 3.487 to 14.31                        | <b>0.0071</b>     |
| <i>Mck</i> AAV $5 \times 10^{13}$ vg/kg (n=5) vs. <i>Mck</i> NaCl (n=3) | 7.443                                 | 2.839 to 12.05                        | <b>0.0076</b>     |

**Table S4. Statistical analysis of echocardiography measurements presented in Figures 5I-L and S4A-B.***Mck* mice treated at 7 weeks of age with AAVRh.10-CAG-hFXN-HA vector or AAVRh.10-hFXN vector at  $2.5 \times 10^{13}$ vg/kg.One-way ANOVA analysis, Mixed-effects model (REML), no assumption of sphericity,  $\alpha = 0.05$ .**Table S4. Statistical analysis of echocardiography measurements in *Mck* mice treated at 7 weeks of age with AAVRh.10-CAG-hFXN-HA vector or AAVRh.10-hFXN vector at  $2.5 \times 10^{13}$ vg/kg. One-way ANOVA analysis, Mixed-effects model (REML), no assumption of sphericity,  $\alpha = 0.05$** 

| <b>Left ventricle shortening fraction</b>                                |                                         |                                       |                  |
|--------------------------------------------------------------------------|-----------------------------------------|---------------------------------------|------------------|
| Fixed effect (type III) = <b>0.0112</b>                                  | F (DFn, DFd): F (0.7212, 3.366) = 27.54 | Geisser-Greenhouse's epsilon = 0.2404 |                  |
| Tukey's multiple comparisons test                                        | Mean Diff.                              | 95.00% CI of diff.                    | Adjusted P Value |
| <i>Mck</i> AAVRh.10-hFXN (n=8) vs. <i>Mck</i> AAVRh.10-CAG-hFXN-HA (n=6) | -1.992                                  | -9.261 to 5.278                       | 0.6098           |
| <i>Mck</i> AAVRh.10-hFXN (n=8) vs. <i>Mck</i> untreated (n=10)           | 14.00                                   | -125.7 to 153.7                       | 0.4786           |
| <i>Mck</i> AAVRh.10-hFXN (n=8) vs. WT NaCl (n=8)                         | -9.949                                  | -24.29 to 4.392                       | 0.1251           |
| <i>Mck</i> AAVRh.10-CAG-hFXN-HA (n=6) vs. <i>Mck</i> untreated (n=10)    | 16.00                                   | -4.653 to 36.64                       | 0.0960           |
| <i>Mck</i> AAVRh.10-CAG-hFXN-HA (n=6) vs. WT NaCl (n=8)                  | -7.957                                  | -14.23 to -1.683                      | <b>0.0153</b>    |
| <i>Mck</i> untreated (n=10) vs. WT NaCl (n=8)                            | -23.95                                  | -27.96 to -19.95                      | <b>0.0003</b>    |
| <b>Cardiac output normalized to body weight</b>                          |                                         |                                       |                  |
| Fixed effect (type III) = <b>0.0112</b>                                  | F (DFn, DFd): F (0.7212, 3.366) = 27.54 | Geisser-Greenhouse's epsilon = 0.2404 |                  |
| Tukey's multiple comparisons test                                        | Mean Diff.                              | 95.00% CI of diff.                    | Adjusted P Value |
| <i>Mck</i> AAVRh.10-hFXN (n=8) vs. <i>Mck</i> AAVRh.10-CAG-hFXN-HA (n=6) | -0.4267                                 | -1.736 to 0.8823                      | 0.5016           |
| <i>Mck</i> AAVRh.10-hFXN (n=8) vs. <i>Mck</i> untreated (n=10)           | 2.016                                   | -18.42 to 22.45                       | 0.4847           |
| <i>Mck</i> AAVRh.10-hFXN (n=8) vs. WT NaCl (n=8)                         | -0.6183                                 | -2.992 to 1.756                       | 0.6401           |
| <i>Mck</i> AAVRh.10-CAG-hFXN-HA (n=6) vs. <i>Mck</i> untreated (n=10)    | 2.443                                   | 0.3170 to 4.569                       | <b>0.0344</b>    |
| <i>Mck</i> AAVRh.10-CAG-hFXN-HA (n=6) vs. WT NaCl (n=8)                  | -0.1916                                 | -1.029 to 0.6456                      | 0.8813           |
| <i>Mck</i> untreated (n=10) vs. WT NaCl (n=8)                            | -2.635                                  | -3.164 to -2.105                      | <b>0.0006</b>    |
| <b>Left ventricle mass normalized to body</b>                            |                                         |                                       |                  |
| Fixed effect (type III) = <b>0.0138</b>                                  | F (DFn, DFd): F (0.7034, 3.282) = 24.91 | Geisser-Greenhouse's epsilon = 0.2345 |                  |
| Tukey's multiple comparisons test                                        | Mean Diff.                              | 95.00% CI of diff.                    | Adjusted P Value |
| <i>Mck</i> AAVRh.10-hFXN (n=8) vs. <i>Mck</i> AAVRh.10-CAG-hFXN-HA (n=6) | 0.0009792                               | 4.837e-005 to 0.001910                | <b>0.0437</b>    |
| <i>Mck</i> AAVRh.10-hFXN (n=8) vs. <i>Mck</i> untreated (n=10)           | 0.001687                                | -6.490e-006 to 0.003381               | <b>0.0505</b>    |
| <i>Mck</i> AAVRh.10-hFXN (n=8) vs. WT NaCl (n=8)                         | -0.0004650                              | -0.02119 to 0.02026                   | 0.9513           |
| <i>Mck</i> AAVRh.10-CAG-hFXN-HA (n=6) vs. <i>Mck</i> untreated (n=10)    | 0.0007082                               | 0.0002797 to 0.001137                 | <b>0.0033</b>    |
| <i>Mck</i> AAVRh.10-CAG-hFXN-HA (n=6) vs. WT NaCl (n=8)                  | -0.001444                               | -0.003638 to 0.0007495                | 0.1412           |
| <i>Mck</i> untreated (n=10) vs. WT NaCl (n=8)                            | -0.002152                               | -0.003301 to -0.001004                | <b>0.0087</b>    |
| <b>Left ventricle end diastole diameter</b>                              |                                         |                                       |                  |
| Fixed effect (type III) = <b>0.0132</b>                                  | F (DFn, DFd): F (0.7051, 5.170) = 15.30 | Geisser-Greenhouse's epsilon = 0.2350 |                  |
| Tukey's multiple comparisons test                                        | Mean Diff.                              | 95.00% CI of diff.                    | Adjusted P Value |
| <i>Mck</i> AAVRh.10-hFXN (n=8) vs. <i>Mck</i> AAVRh.10-CAG-hFXN-HA (n=6) | -0.001386                               | -0.05710 to 0.05433                   | 0.9992           |
| <i>Mck</i> AAVRh.10-hFXN (n=8) vs. <i>Mck</i> untreated (n=10)           | -0.03596                                | -0.9011 to 0.8292                     | 0.8200           |
| <i>Mck</i> AAVRh.10-hFXN (n=8) vs. WT NaCl (n=8)                         | 0.02581                                 | -0.05129 to 0.1029                    | 0.4848           |
| <i>Mck</i> AAVRh.10-CAG-hFXN-HA (n=6) vs. <i>Mck</i> untreated (n=10)    | -0.03457                                | -0.09014 to 0.02099                   | 0.1603           |
| <i>Mck</i> AAVRh.10-CAG-hFXN-HA (n=6) vs. WT NaCl (n=8)                  | 0.02720                                 | 0.01198 to 0.04241                    | <b>0.0020</b>    |
| <i>Mck</i> untreated (n=10) vs. WT NaCl (n=8)                            | -0.06177                                | -0.09496 to -0.02858                  | <b>0.0088</b>    |
| <b>Left ventricle end systole diameter</b>                               |                                         |                                       |                  |
| Fixed effect (type III) = <b>0.0132</b>                                  | F (DFn, DFd): F (0.7051, 5.170) = 15.30 | Geisser-Greenhouse's epsilon = 0.2350 |                  |
| Tukey's multiple comparisons test                                        | Mean Diff.                              | 95.00% CI of diff.                    | Adjusted P Value |
| <i>Mck</i> AAVRh.10-hFXN (n=8) vs. <i>Mck</i> AAVRh.10-CAG-hFXN-HA (n=6) | -0.001386                               | -0.05710 to 0.05433                   | 0.9992           |
| <i>Mck</i> AAVRh.10-hFXN (n=8) vs. <i>Mck</i> untreated (n=10)           | -0.03596                                | -0.9011 to 0.8292                     | 0.8200           |
| <i>Mck</i> AAVRh.10-hFXN (n=8) vs. WT NaCl (n=8)                         | 0.02581                                 | -0.05129 to 0.1029                    | 0.4848           |
| <i>Mck</i> AAVRh.10-CAG-hFXN-HA (n=6) vs. <i>Mck</i> untreated (n=10)    | -0.03457                                | -0.09014 to 0.02099                   | 0.1603           |
| <i>Mck</i> AAVRh.10-CAG-hFXN-HA (n=6) vs. WT NaCl (n=8)                  | 0.02720                                 | 0.01198 to 0.04241                    | <b>0.0020</b>    |
| <i>Mck</i> untreated (n=10) vs. WT NaCl (n=8)                            | -0.06177                                | -0.09496 to -0.02858                  | <b>0.0088</b>    |

**Table S5.** Primers sequence.

| <b>Gene</b>    | <b>Forward</b>          | <b>Reverse</b>            |
|----------------|-------------------------|---------------------------|
| <i>18s</i>     | ACCGCAGCTAGGAATAATGGAA  | CCTCCGACTTTCGTTCTTGATT    |
| <i>Hprt</i>    | GTAATGATCAGTCAACGGGGGAC | CCAGCAAGCTTGCAACCTTAACCA  |
| <i>Fxn</i>     | ATGGCGTGCTCACCATTAAG    | GGCCAATGAAGACAAGTCCA      |
| <i>FXN</i>     | AGAGGAAACGCTGGACTCTT    | ACGCTTAGGTCCACTGGATG      |
| <i>Col1a1</i>  | TCACCTACAGCACCCCTTGTG   | GTCCGAATTCTGGTCTGG        |
| <i>Col3a1</i>  | TCAAGGCTGAAGGAAACAGC    | GGGTAGTCTCATTGCCTTGC      |
| <i>Tgf · 1</i> | GGAGAGCCCTGGATACCAAC    | CAACCCAGGTCCTTCCTAAA      |
| <i>Il1b</i>    | AGCTATGGCAACTGTTCTCTGA  | CTGCCACAGCTTCTCCACA       |
| <i>Il6</i>     | GTGACAACCACGGCCTTC      | ACAACCTCTTTTCTCATTTCCACGA |
| <i>Tnf ·</i>   | TCAGTTCTATGGCCCAGACCC   | GTCTTTGAGATCCATGCCGTT     |
| <i>Nppa</i>    | TCGTCTTGGCCTTTTGGCT     | TCCAGGTGGTCTAGCAGGTTCT    |
| <i>Nppb</i>    | AAGTCCTAGCCAGTCTCCAGA   | GAGCTGTCTCTGGGCCATTTC     |
| <i>Asns</i>    | ATTACGACAGTTCGGGCATC    | TCTCAGTTCGAGACCGTGTC      |
| <i>Mthfd2</i>  | AATTTGGGCTTTGCAGTGAC    | AACTCCCAAAGAGCAGCTG       |
| <i>Ddit3</i>   | CCAGAATAACAGCCGGAACC    | ATCCTCATACCAGGCTTCCA      |
| <i>Trib3</i>   | CGCTTTGTCTTCAGCAACTGT   | TCATCTGATCCAGTCATCAG      |
| <i>Fgf21</i>   | ACCTCTACACAGATGACGACCA  | AGAAACCTAGAGGCTTTGACACC   |
| <i>Gdf15</i>   | GCTGCTACTCCGCGTCAACC    | CTACCCGTAAGCGCAGTTCC      |
